# Supplementary material for: New ruthenium(ii) complexes with quinone diimine and substituted bipyridine as inert ligands: synthesis, characterization, mechanism of action, DNA/HSA binding affinity and cytotoxic activity
Source: Royal Society of Chemistry journal article supplement (doi:10.1039/d2dt02993f), 2022-12-24
Supplement: d2dt02993f1.pdf [file d2dt02993f1.pdf]

**New ruthenium(II) complexes with quinone diimine and substituted bipyridine as inert ligands: Synthesis, characterization, mechanism of action, DNA/HSA binding affinity and cytotoxic activity**

Milica Međedović,<sup>a</sup> Ana Rilak Simović,<sup>\*b</sup> Dušan Čović,<sup>a</sup> Laura Senft,<sup>c</sup> Sanja Matic<sup>d</sup>, Danijela Todorović<sup>e</sup>, Suzana Popović<sup>f</sup>, Dejan Baskić<sup>f</sup> and Biljana Petrović<sup>\*a</sup>

<sup>a</sup>*University of Kragujevac, Faculty of Science, Department of Chemistry, Radoja Domanovića 12, 34000 Kragujevac, Serbia.*

<sup>b</sup>*University of Kragujevac, Institute for Information Technologies Kragujevac, Department of Natural Sciences, Jovana Cvijića bb, 34000 Kragujevac, Serbia.*

<sup>c</sup>*Department Chemie, Ludwig-Maximilians Universität (LMU) München, 81377 München, Germany.*

<sup>d</sup>*Department of Pharmacy, Faculty of Medical Sciences, University of Kragujevac, Svetozara Markovića 69, 34000 Kragujevac, Serbia.*

<sup>e</sup>*University of Kragujevac, Faculty of Medical Sciences, Department of Genetics, Svetozara Markovića 69, 34000 Kragujevac, Serbia.*

<sup>f</sup>*University of Kragujevac, Faculty of Medical Sciences, Centre for Molecular Medicine and Stem Cell Research, Svetozara Markovića 69, 34000 Kragujevac, Serbia.*

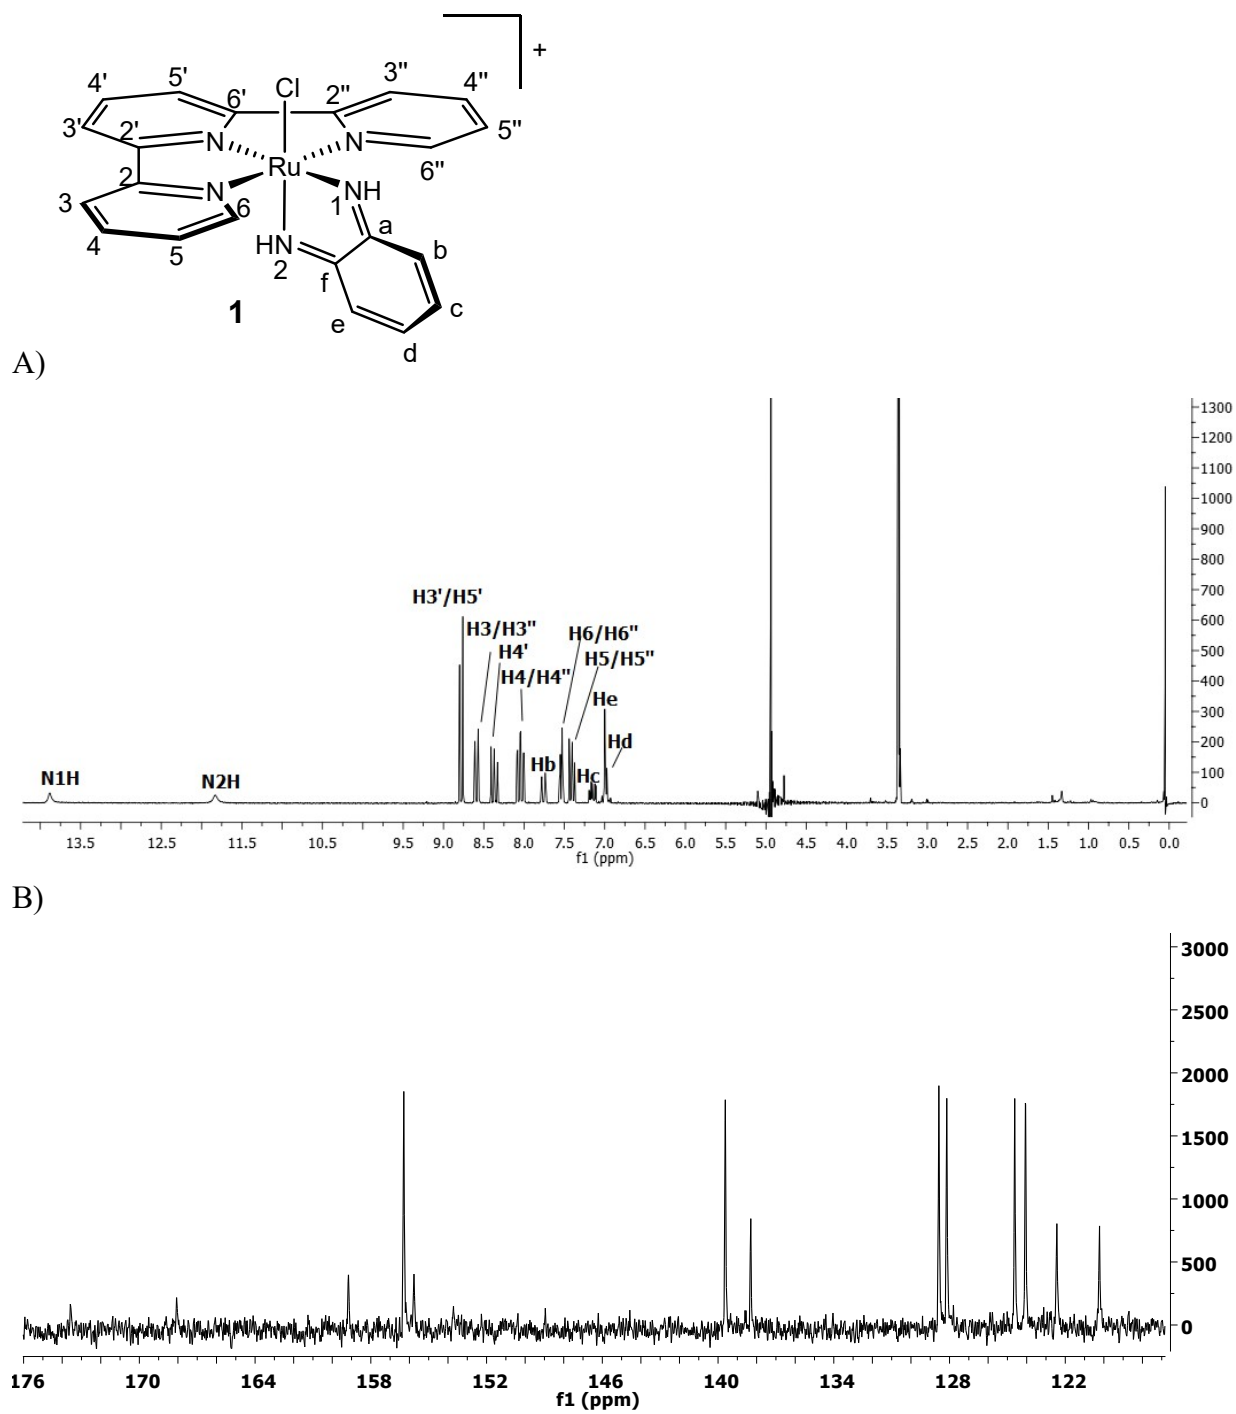

**Fig. S1.** A)  $^1\text{H}$  and B)  $^{13}\text{C}$  NMR spectrum of  $[\text{Ru}(\text{tpy})(o\text{-bqdi})\text{Cl}]\text{Cl}$  (**1**) in  $\text{CD}_3\text{OD}$  at 298 K.

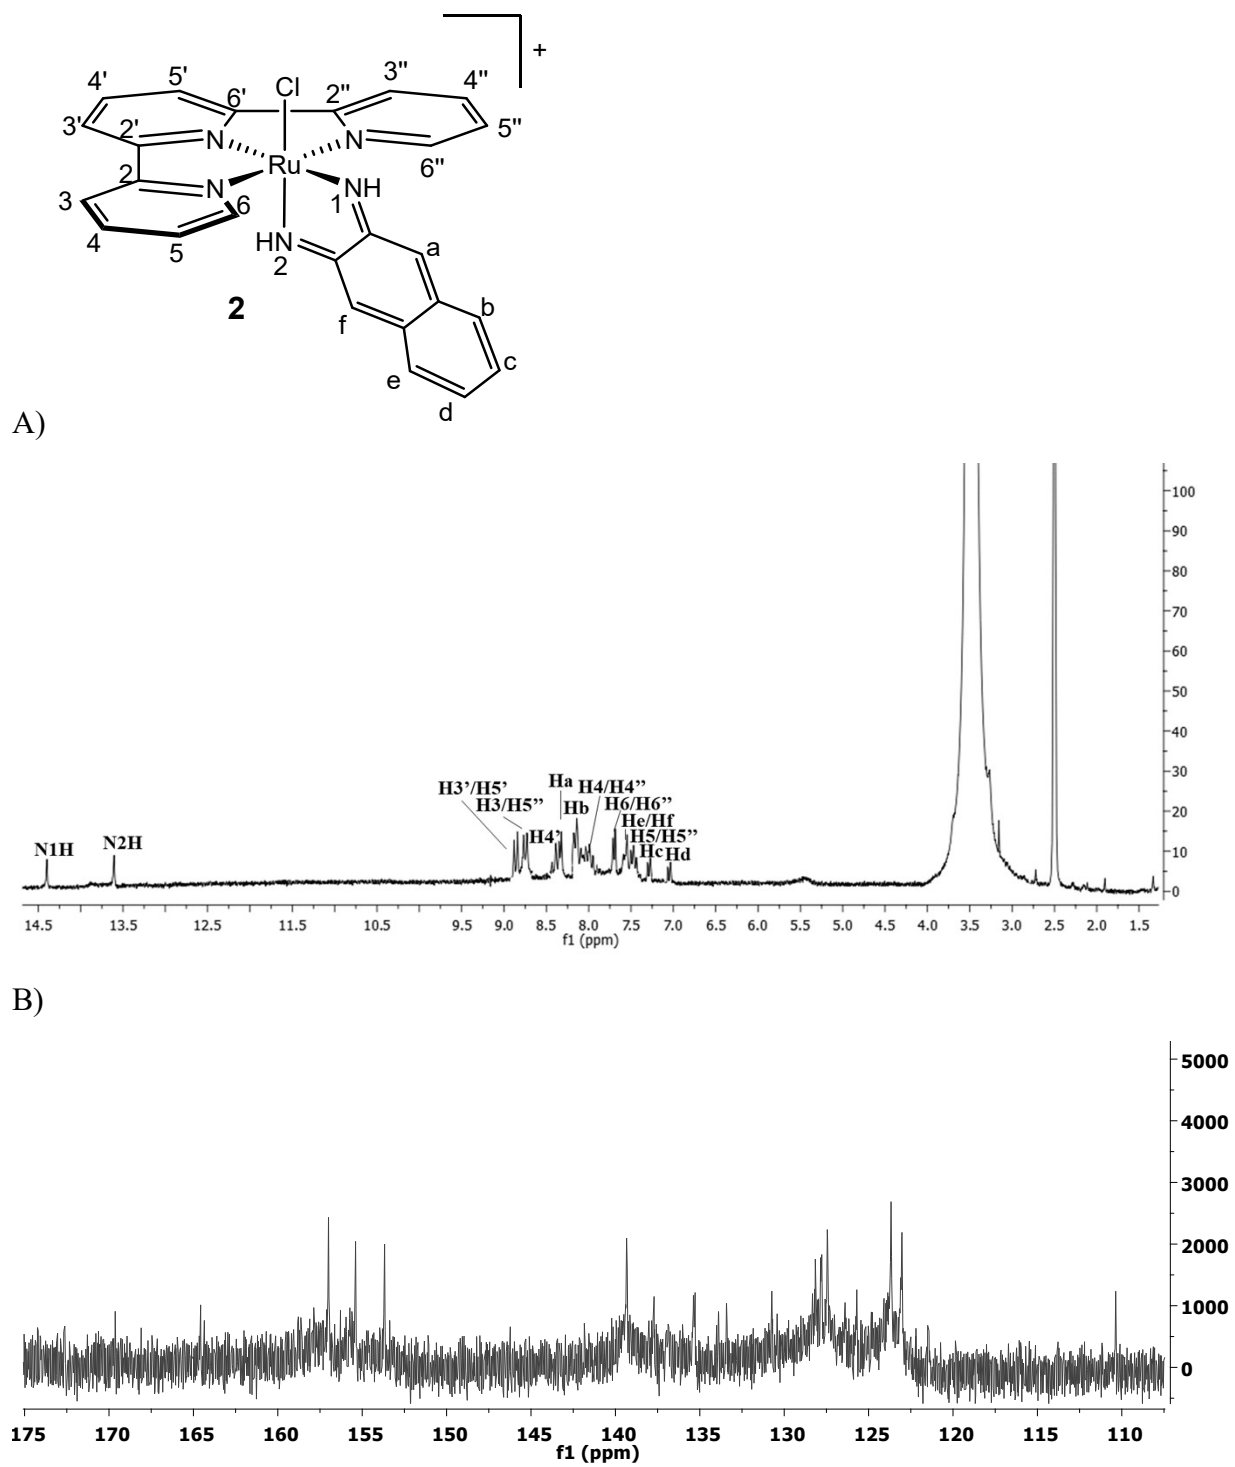

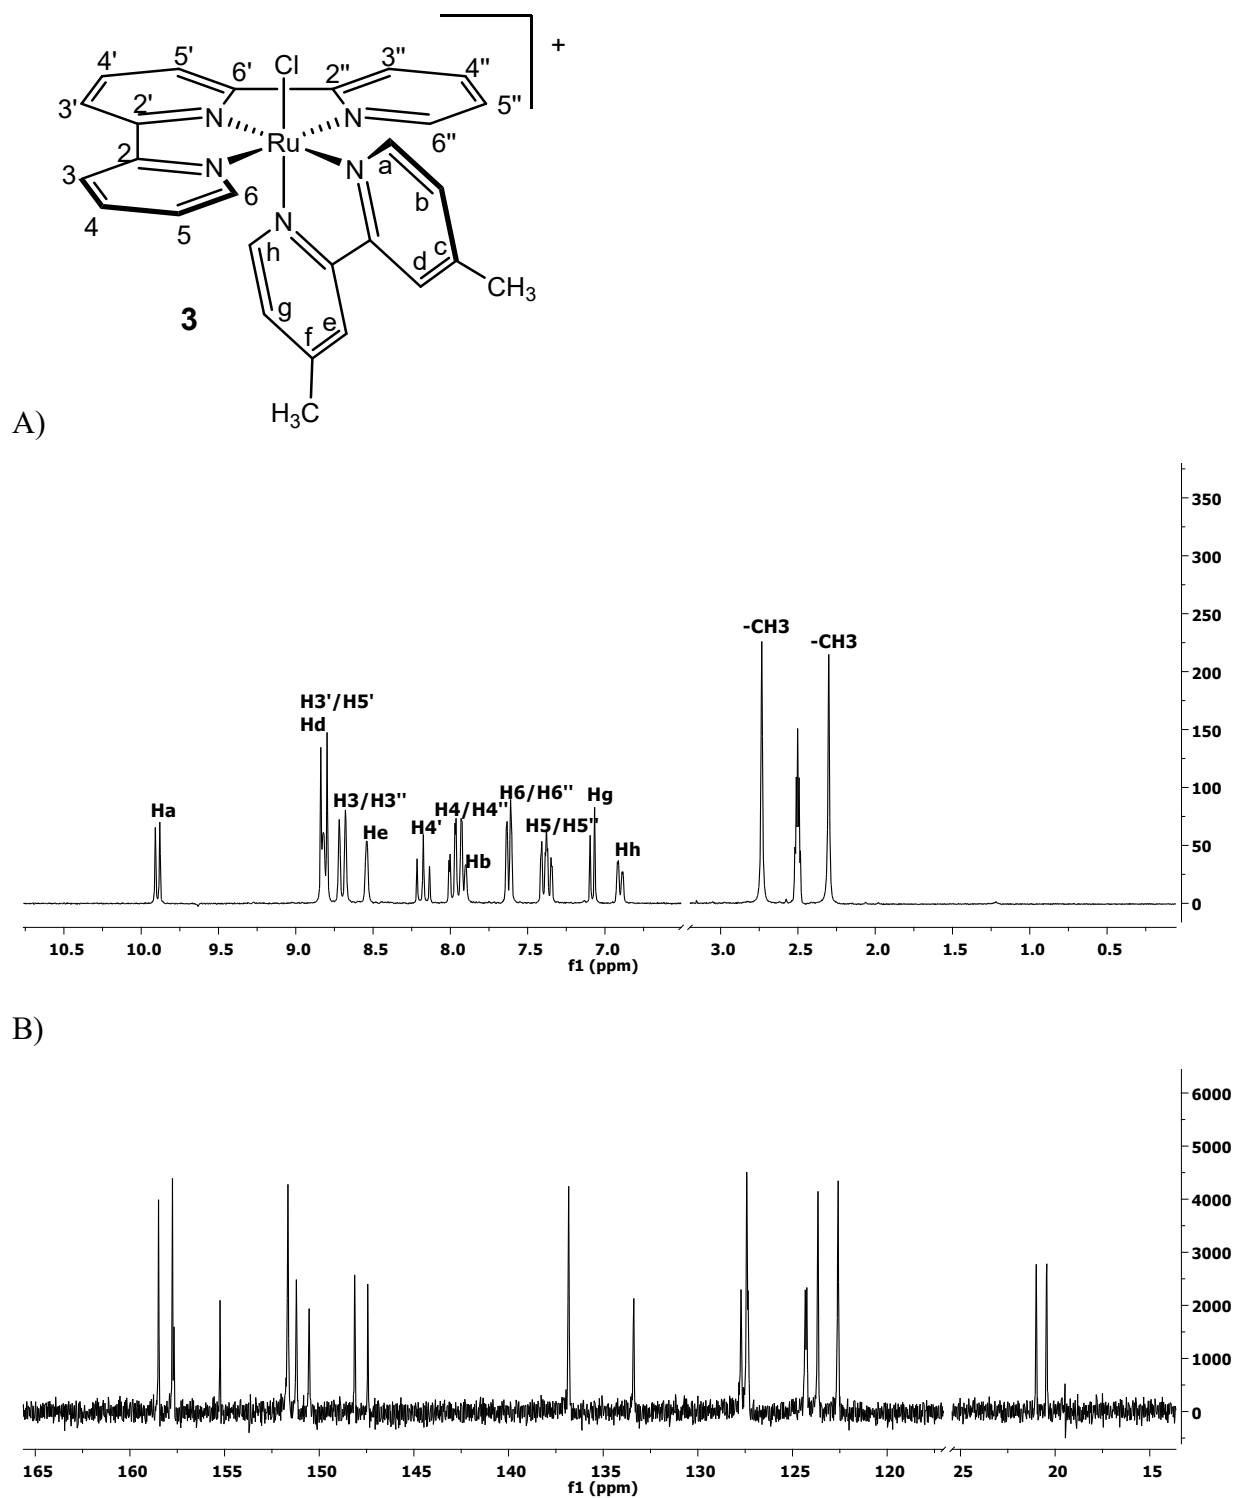

**Fig. S3.** A)  $^1\text{H}$  and B)  $^{13}\text{C}$  NMR spectrum of  $[\text{Ru}(\text{tpy})(\text{dmbpy})\text{Cl}]\text{Cl}$  (**3**) in  $\text{DMSO-}d_6$  at 298 K.

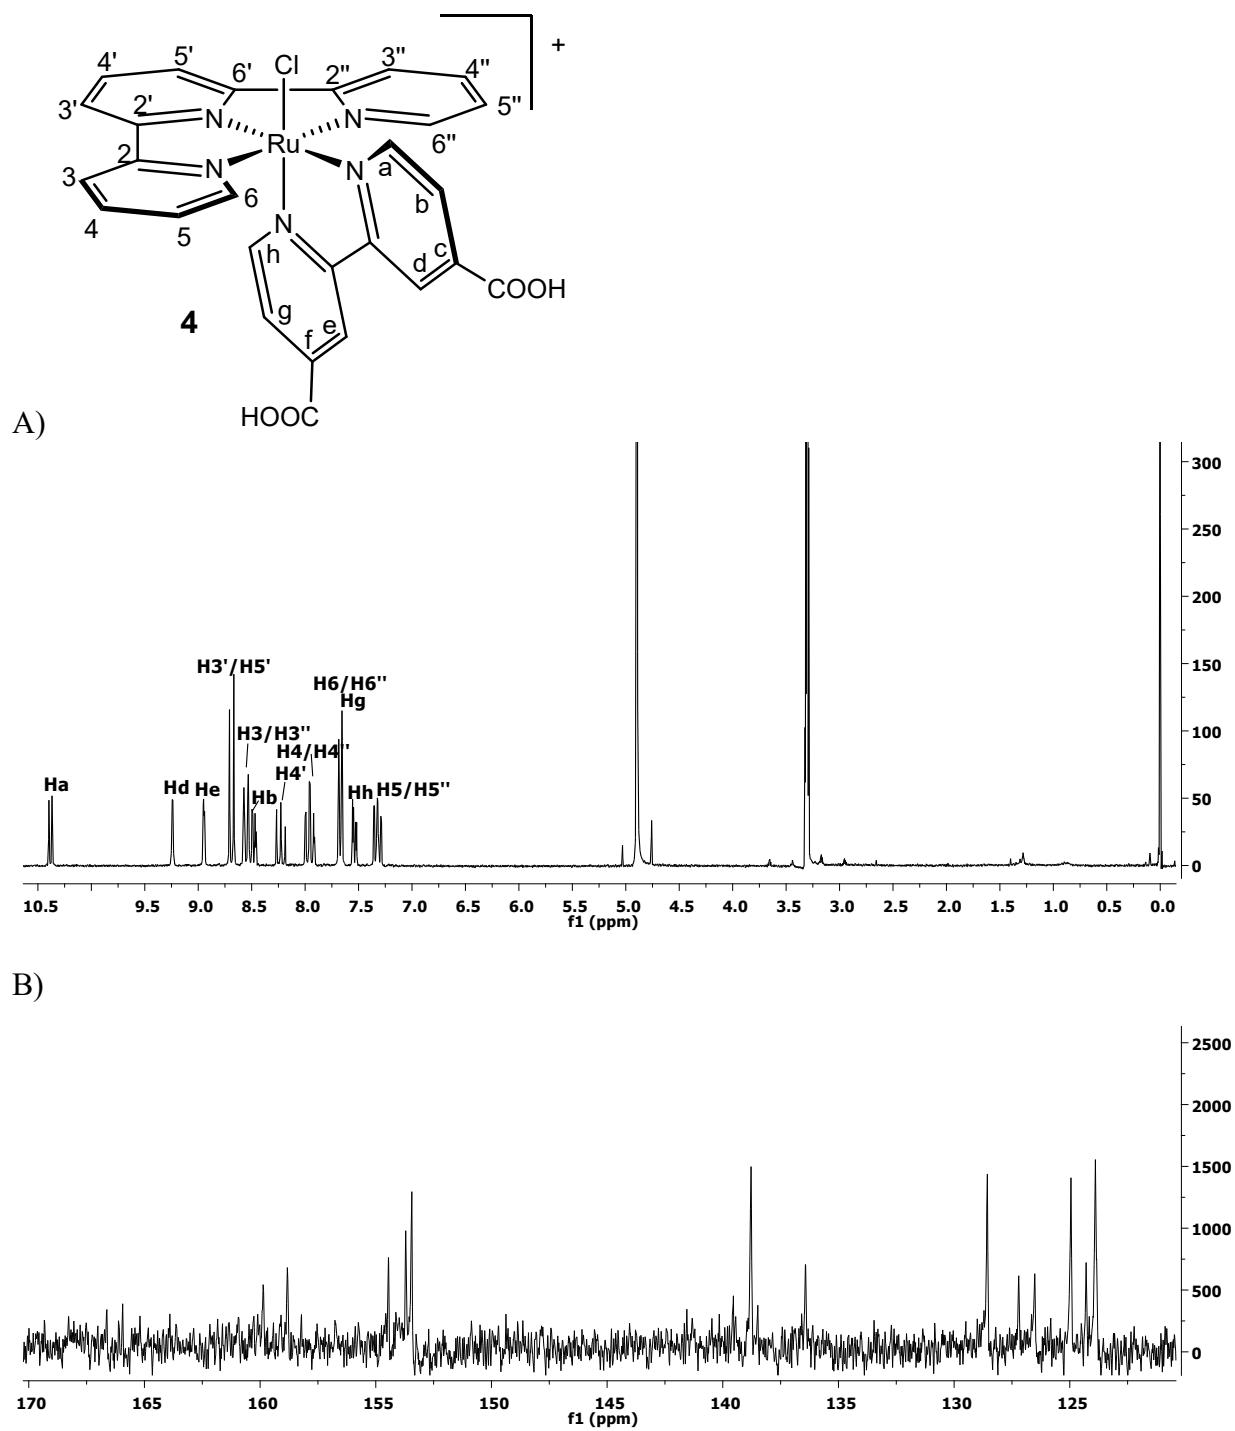

**Fig. S4.** A)  $^1\text{H}$  and B)  $^{13}\text{C}$  NMR spectrum of  $[\text{Ru}(\text{tpy})(\text{dcbpy})\text{Cl}]\text{Cl}$  (**4**) in  $\text{CD}_3\text{OD}$  at 298 K.

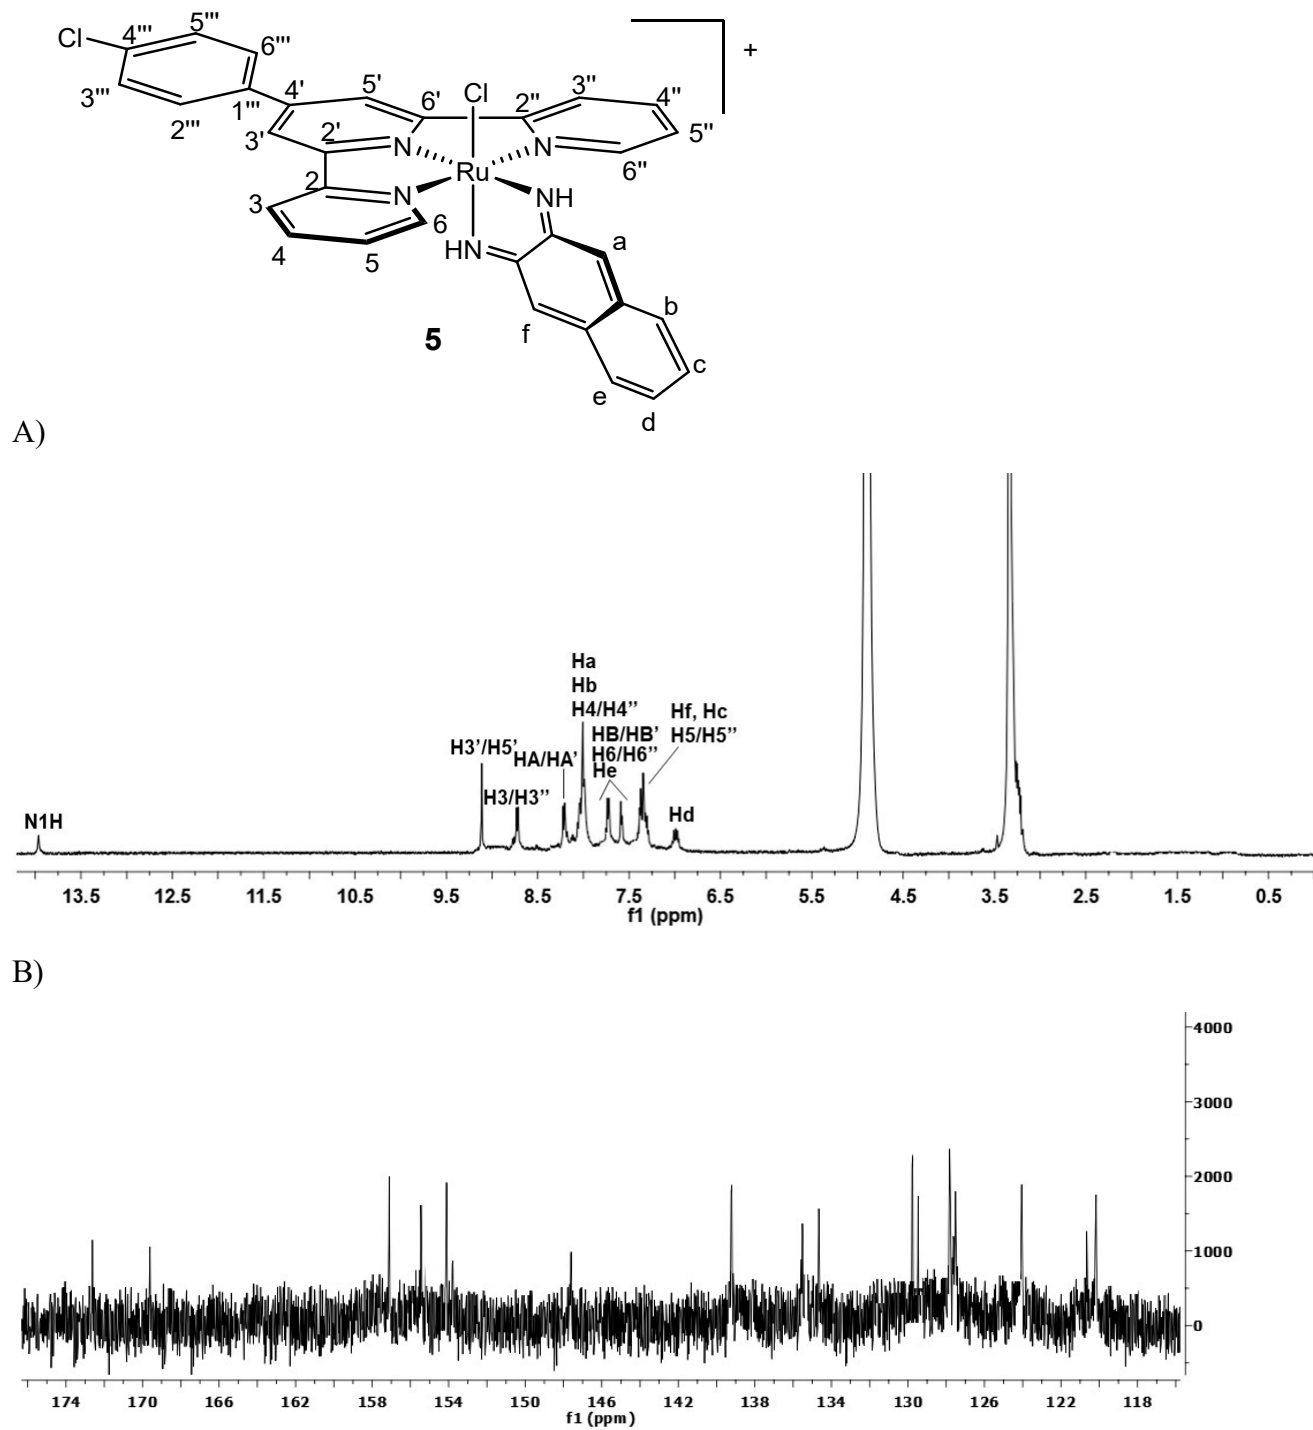

**Fig. S5.** A)  $^1\text{H}$  NMR spectrum in  $\text{CD}_3\text{OD}$  and B)  $^{13}\text{C}$  NMR spectrum in  $\text{DMSO-d}_6$  of  $[\text{Ru}(\text{Cl-Ph-tpy})(\text{nqdi})\text{Cl}]\text{Cl}$  (**5**) at 298 K.

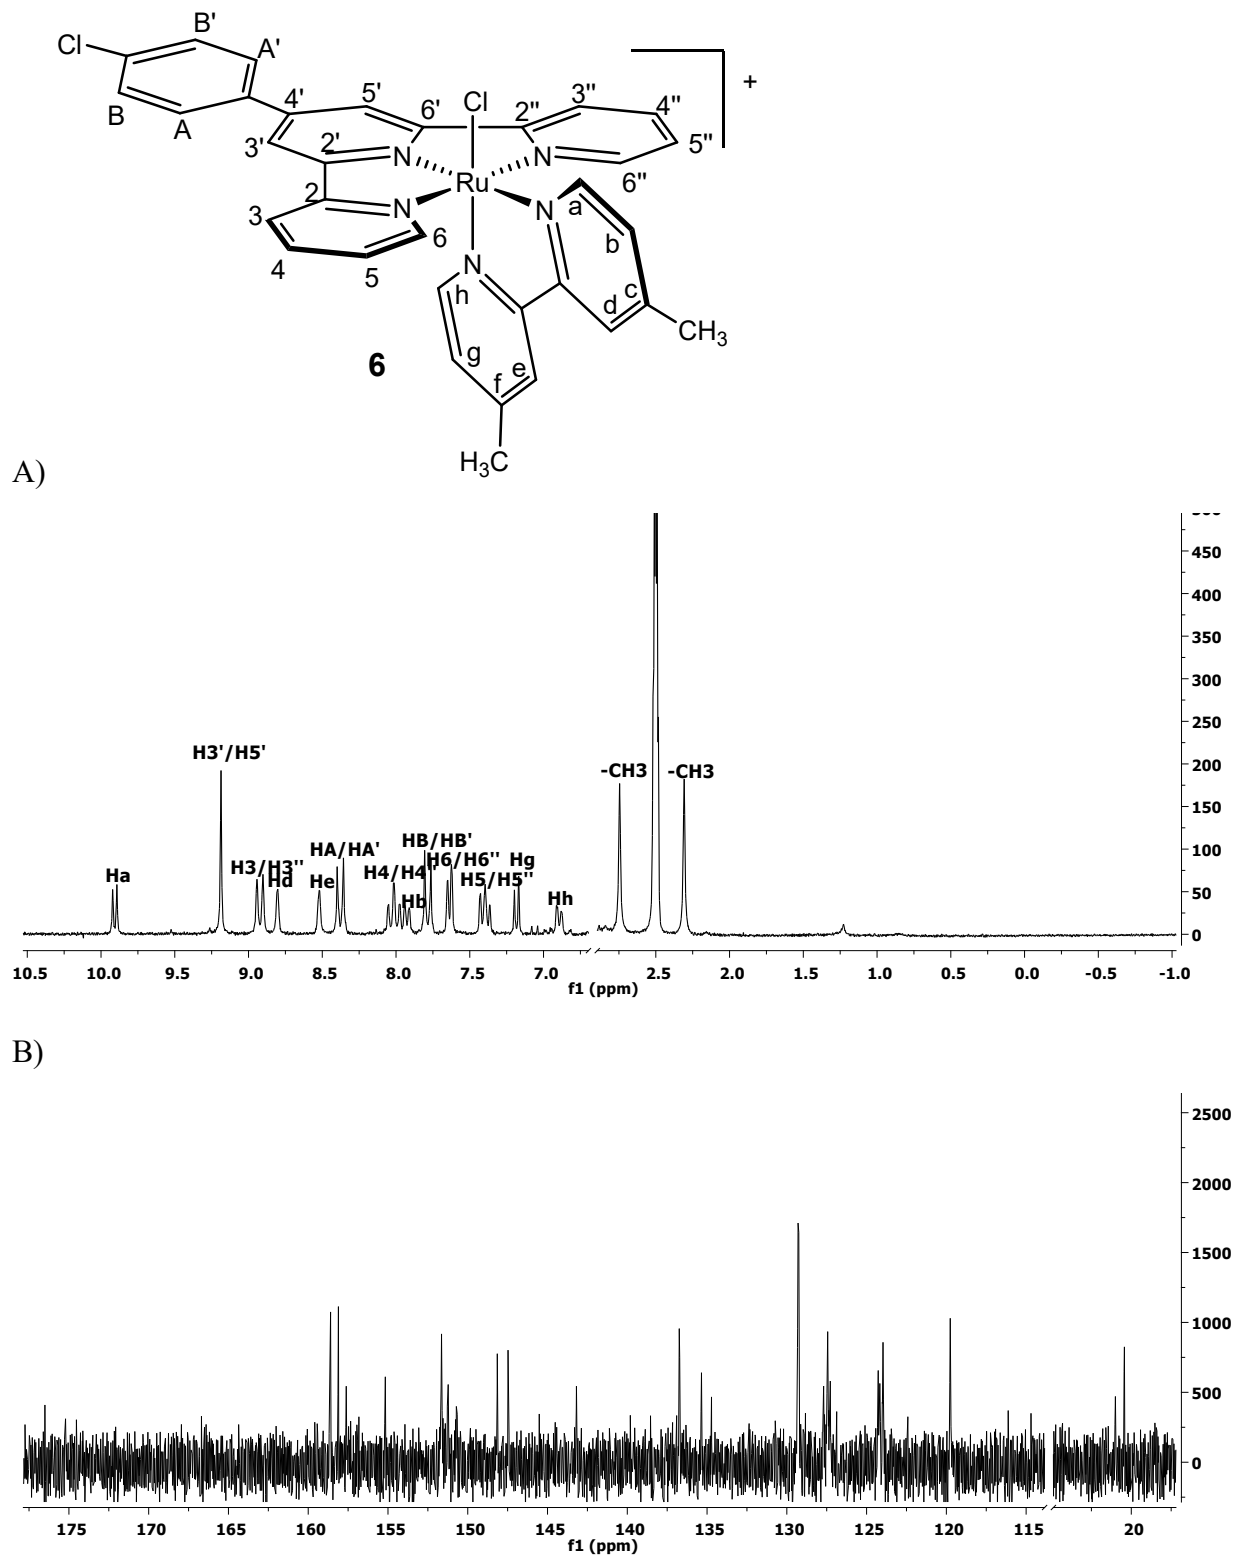

**Fig. S6.** A)  $^1\text{H}$  and B)  $^{13}\text{C}$  NMR spectrum of  $[\text{Ru}(\text{Cl-Ph-tpy})(\text{dmbpy})\text{Cl}]\text{Cl}$  (**6**) in  $\text{DMSO-d}_6$  at 298 K.

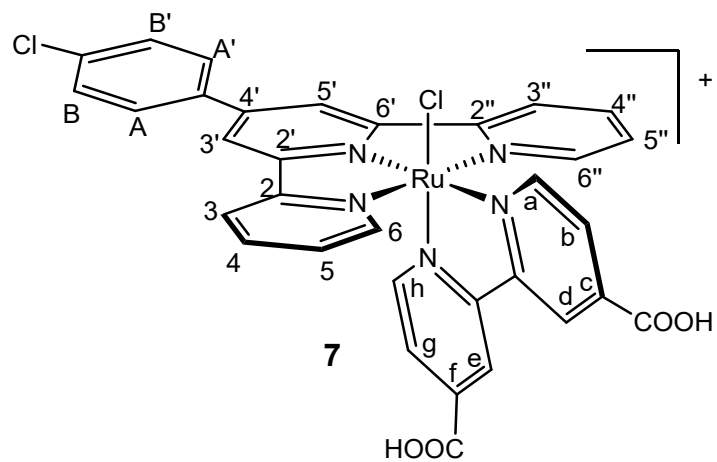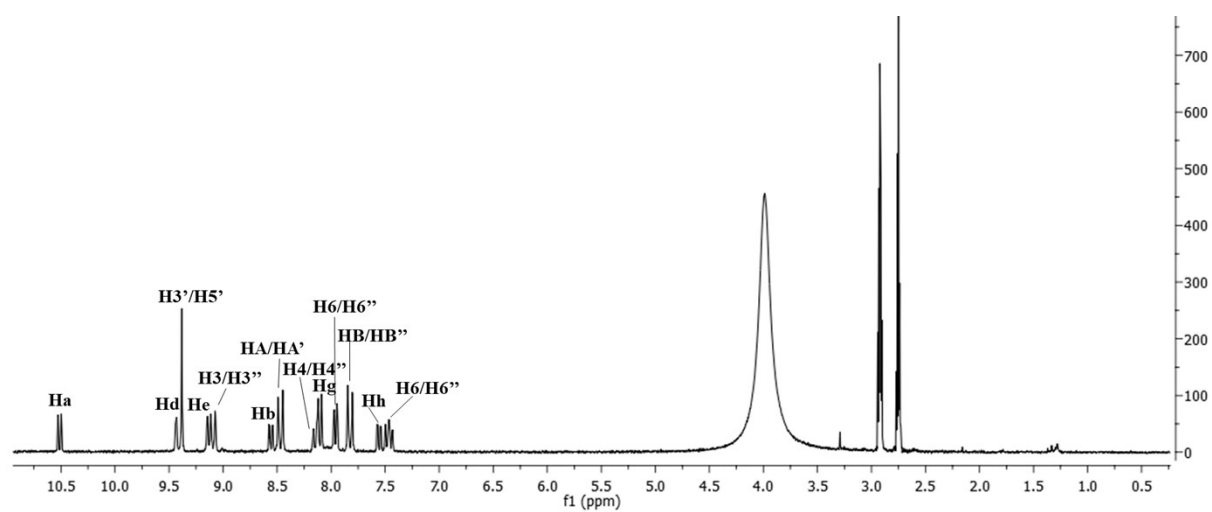

**Fig. S7.**  $^1\text{H}$  NMR spectrum of  $[\text{Ru}(\text{Cl-Ph-tpy})(\text{dcbpy})\text{Cl}]\text{Cl}$  (7) in  $\text{CD}_3\text{OD}$  at 298 K.



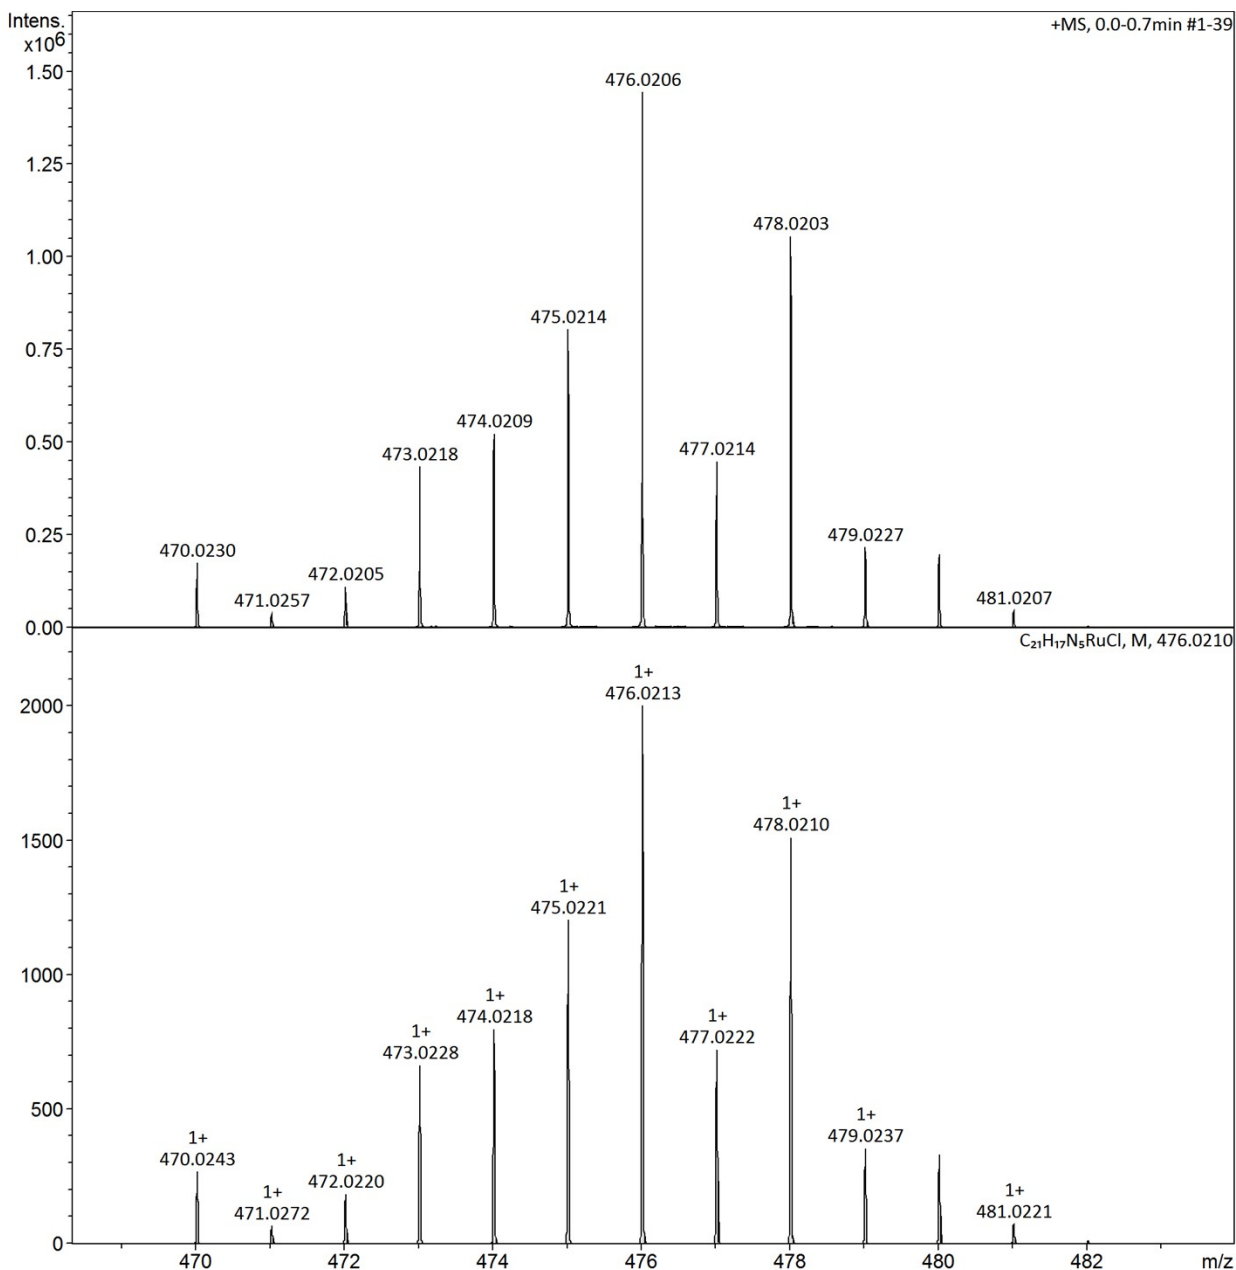

**Fig. S8.** ESI mass spectrum of complex **1** dissolved in acetonitrile. The spectrum was acquired in positive mode. Instrumental settings were: the source voltage was 3.5 kV, the flow rates were 180  $\mu$ L/hour, the drying gas ( $N_2$ ), to aid solvent removal, was held at 180  $^\circ$ C and the spray gas was held at 20  $^\circ$ C. The theoretical and experimentally obtained isotopic distributions are shown in parallel.

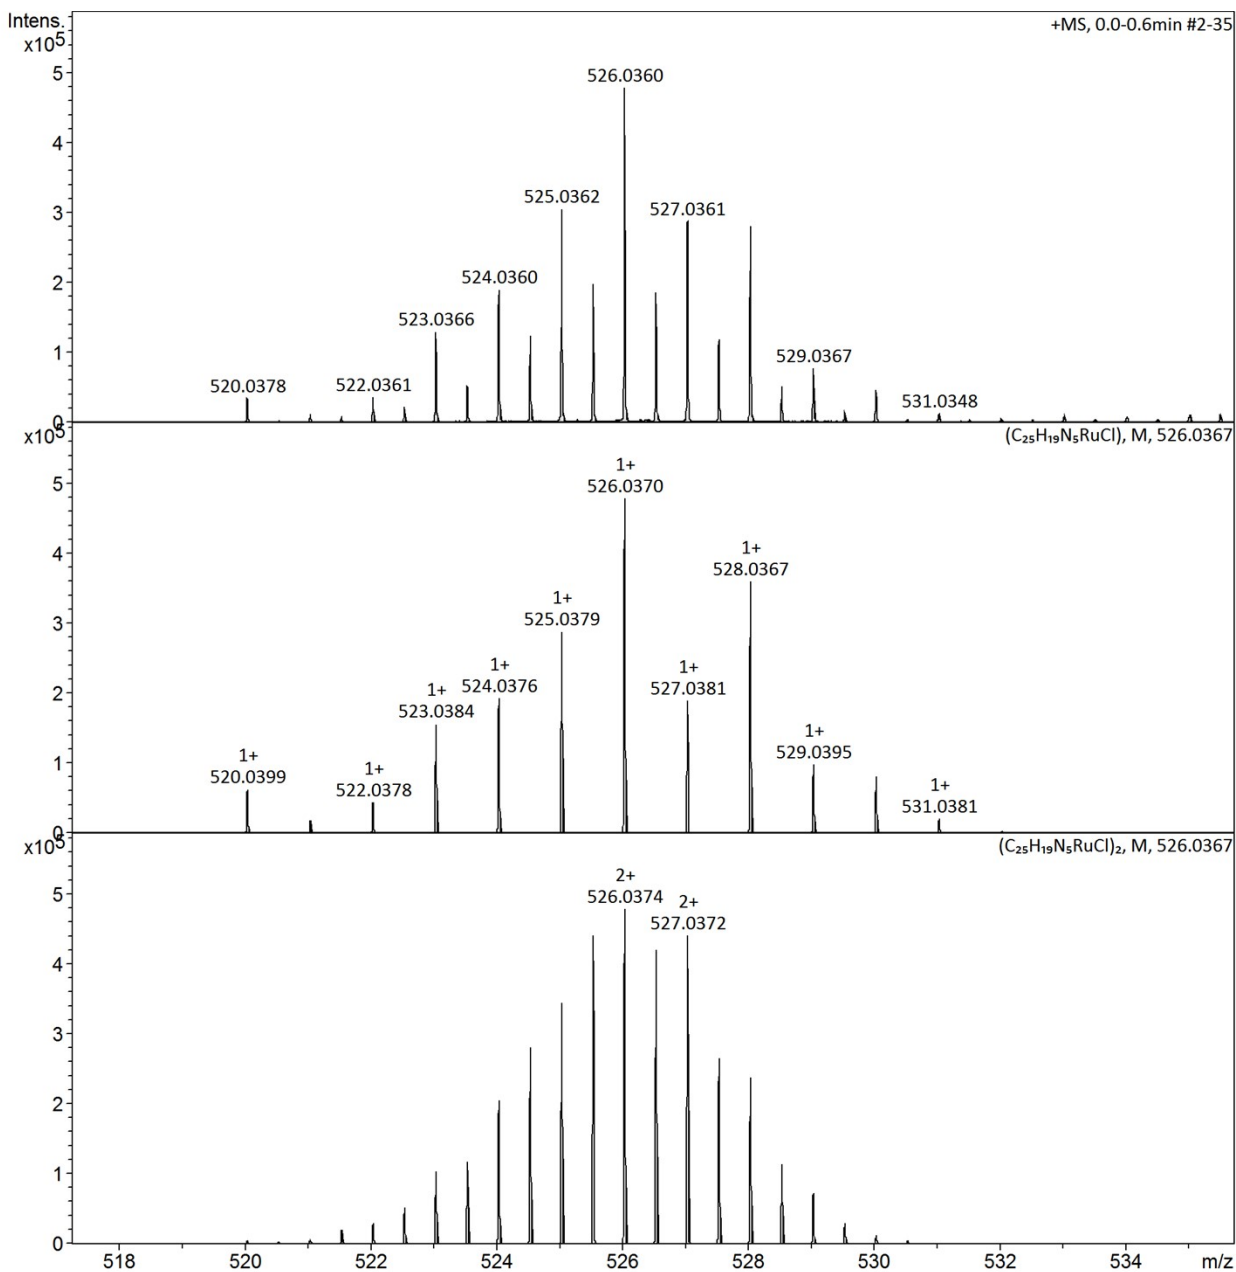

**Fig. S9.** ESI mass spectrum of complex **2** dissolved in acetonitrile. The spectrum was acquired in positive mode. Instrumental settings were: the source voltage was 3.5 kV, the flow rates were 180  $\mu$ L/hour, the drying gas (N<sub>2</sub>), to aid solvent removal, was held at 180 °C and the spray gas was held at 20 °C. The theoretical and experimentally obtained isotopic distributions are shown in parallel.

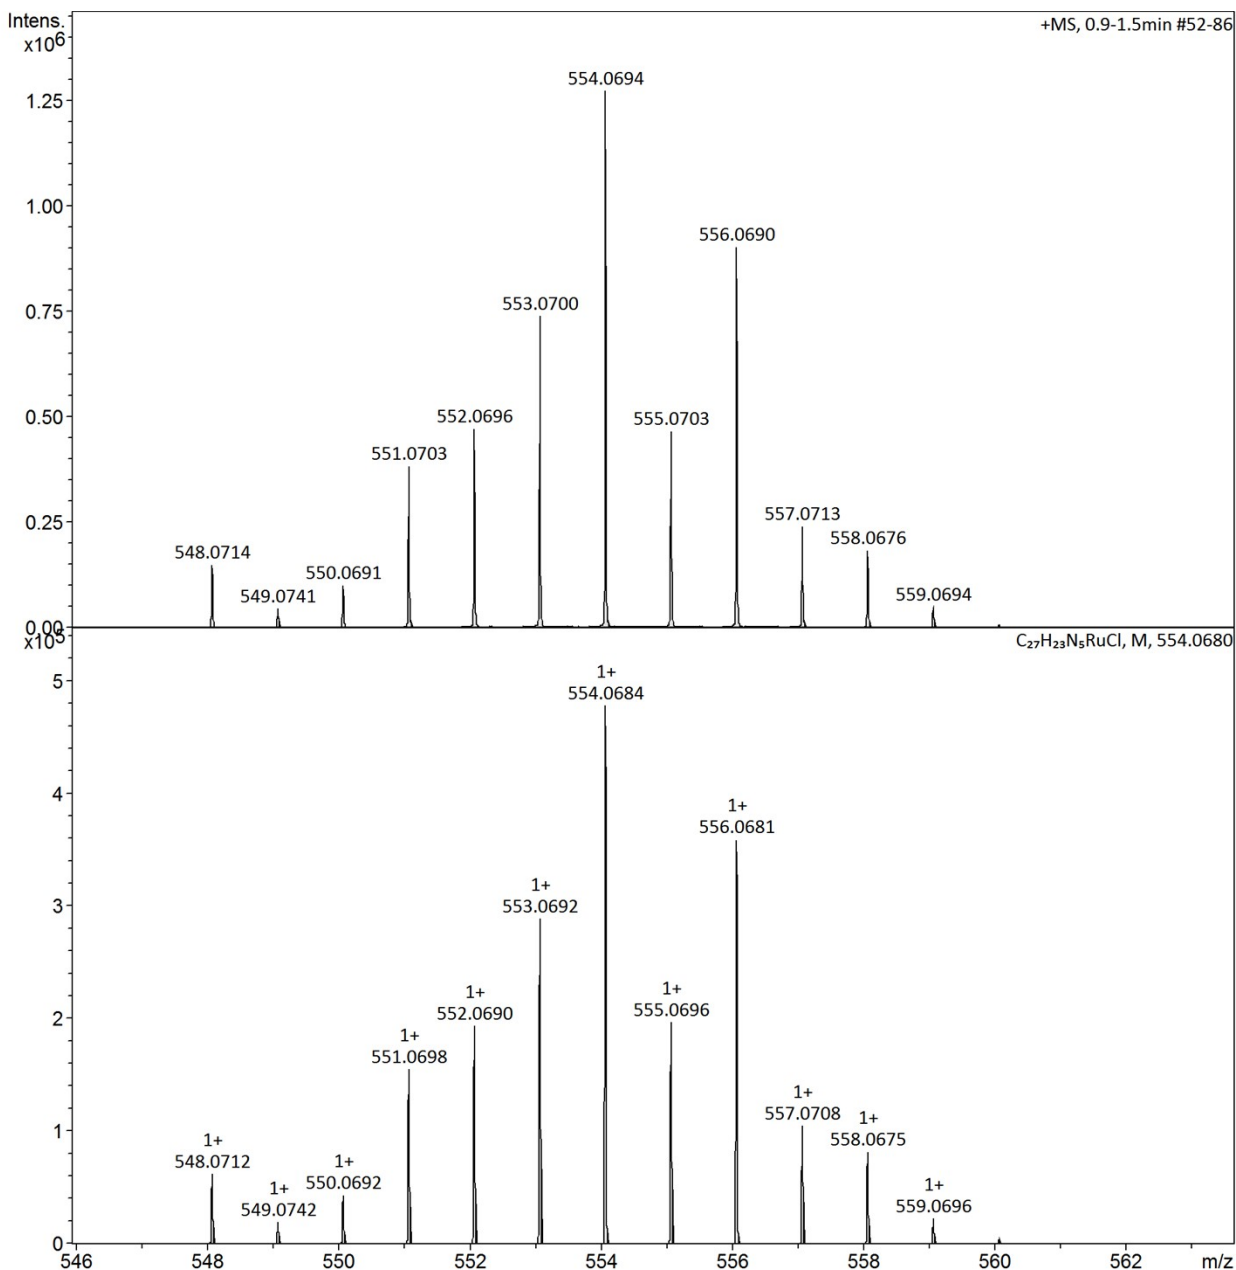

**Fig. S10.** ESI mass spectrum of complex **3** dissolved in acetonitrile. The spectrum was acquired in positive mode. Instrumental settings were: the source voltage was 3.5 kV, the flow rates were 180  $\mu$ L/hour, the drying gas ( $N_2$ ), to aid solvent removal, was held at 180  $^{\circ}C$  and the spray gas was held at 20  $^{\circ}C$ . The theoretical and experimentally obtained isotopic distributions are shown in parallel.

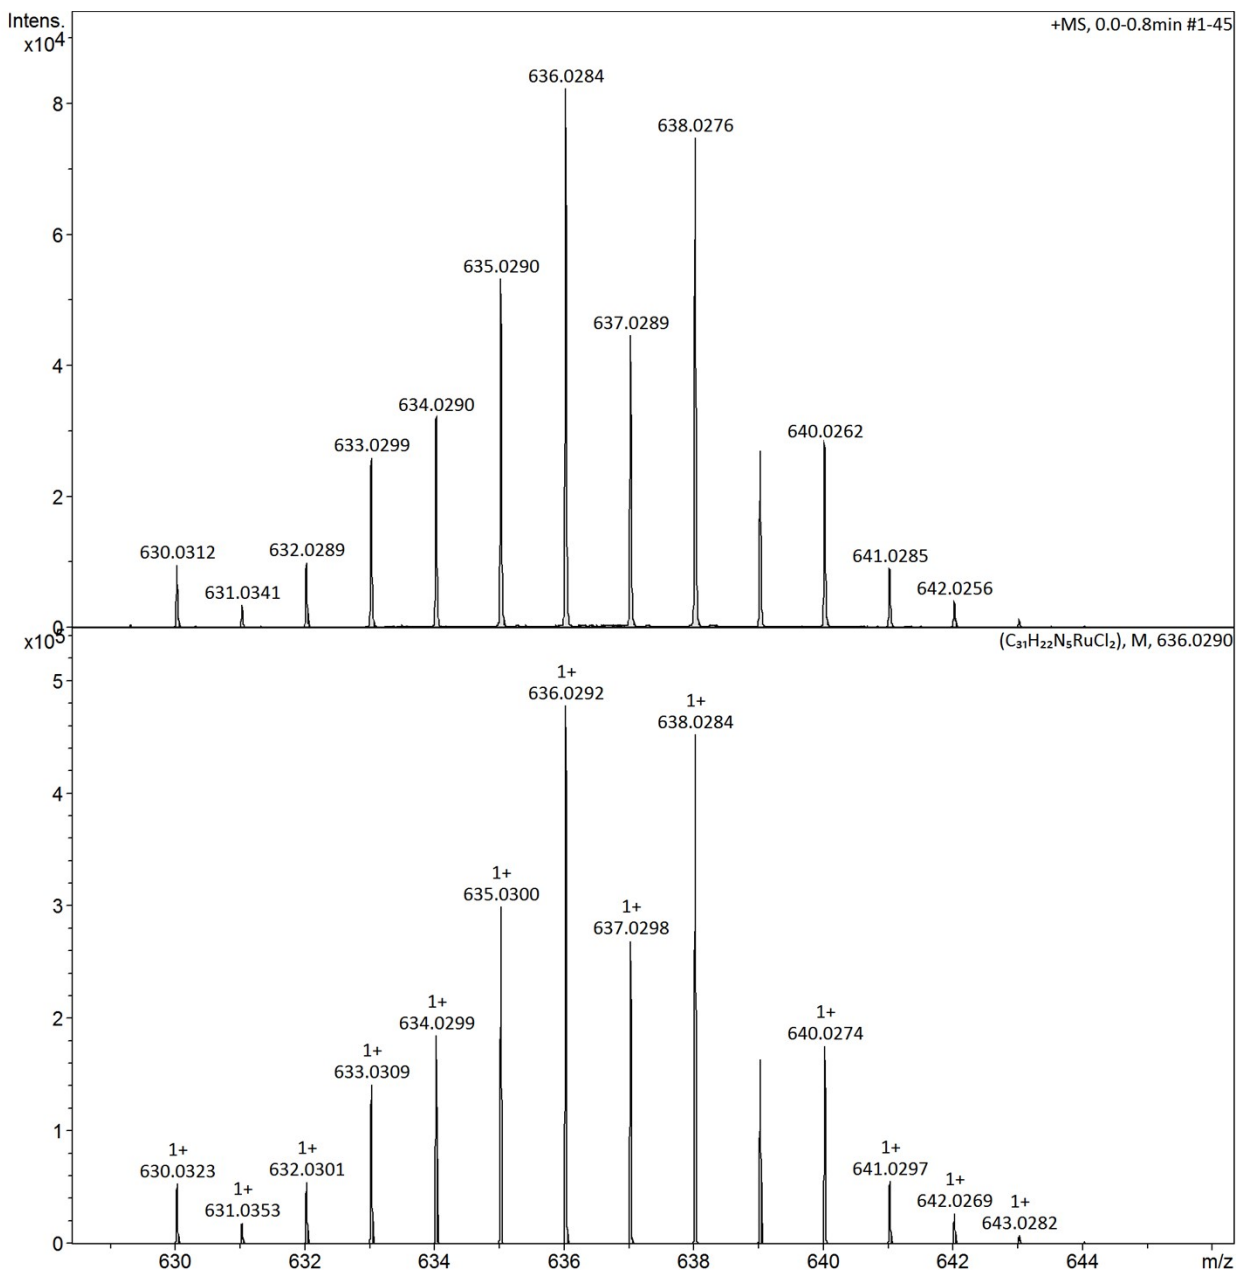

**Fig. S11.** ESI mass spectrum of complex **5** dissolved in acetonitrile. The spectrum was acquired in positive mode. Instrumental settings were: the source voltage was 3.5 kV, the flow rates were 180  $\mu$ L/hour, the drying gas (N<sub>2</sub>), to aid solvent removal, was held at 180 °C and the spray gas was held at 20 °C. The theoretical and experimentally obtained isotopic distributions are shown in parallel.

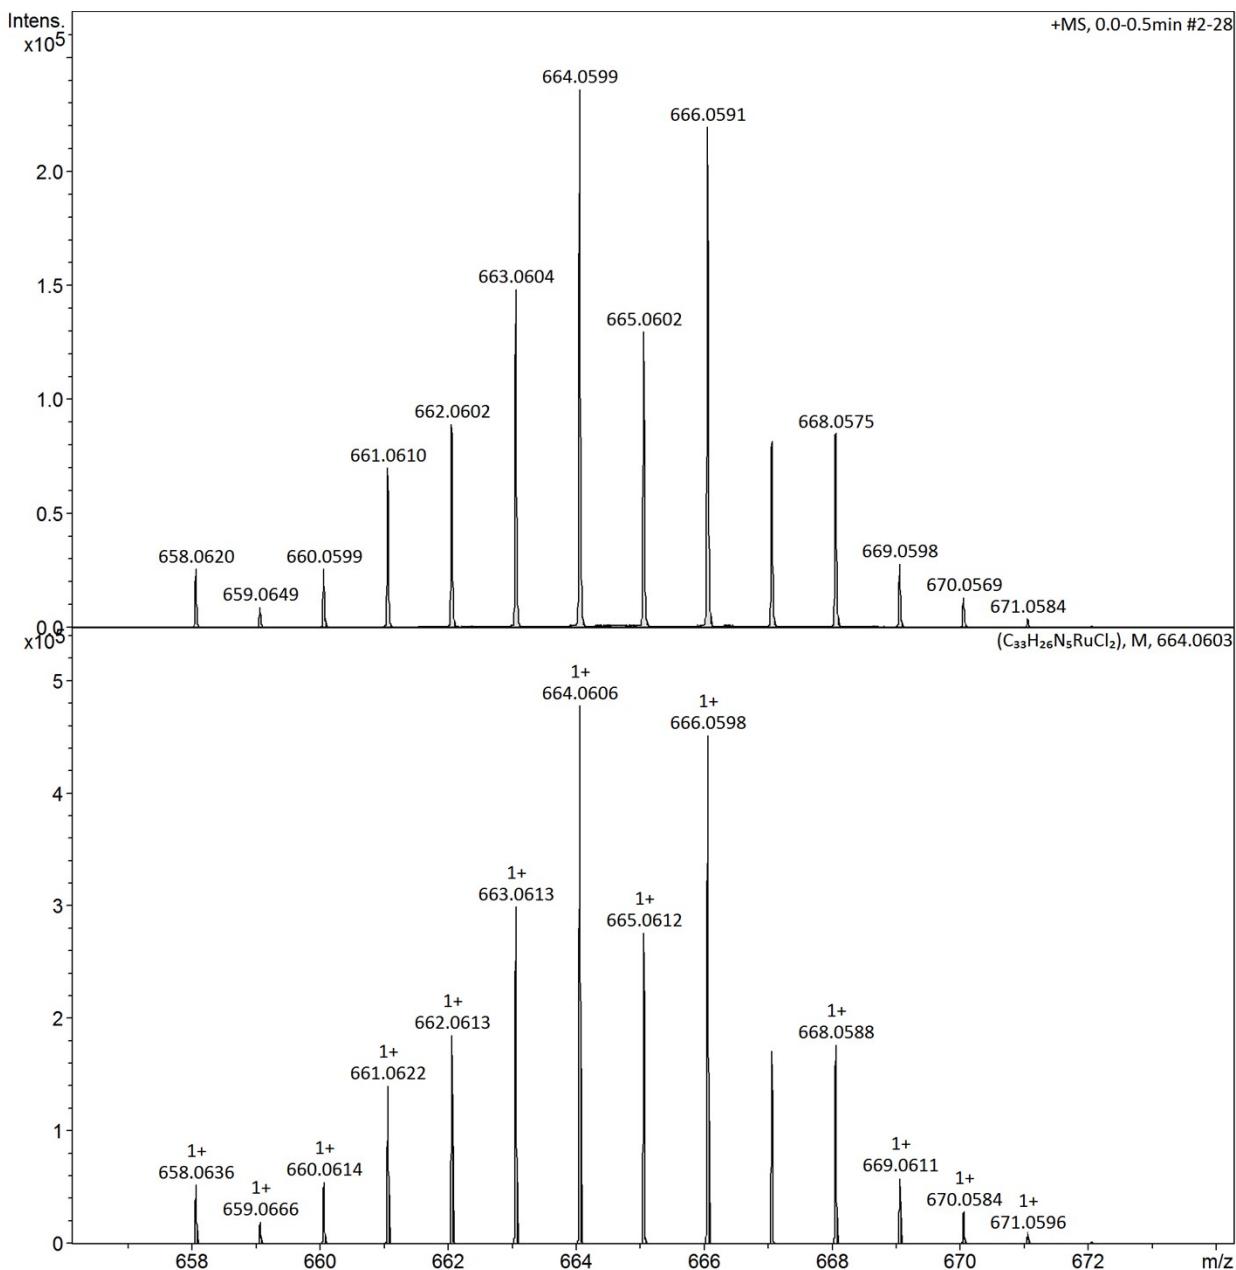

**Fig. S12.** ESI mass spectrum of complex **6** dissolved in acetonitrile. The spectrum was acquired in positive mode. Instrumental settings were: the source voltage was 3.5 kV, the flow rates were 180  $\mu$ L/hour, the drying gas ( $N_2$ ), to aid solvent removal, was held at 180  $^{\circ}C$  and the spray gas was held at 20  $^{\circ}C$ . The theoretical and experimentally obtained isotopic distributions are shown in parallel.

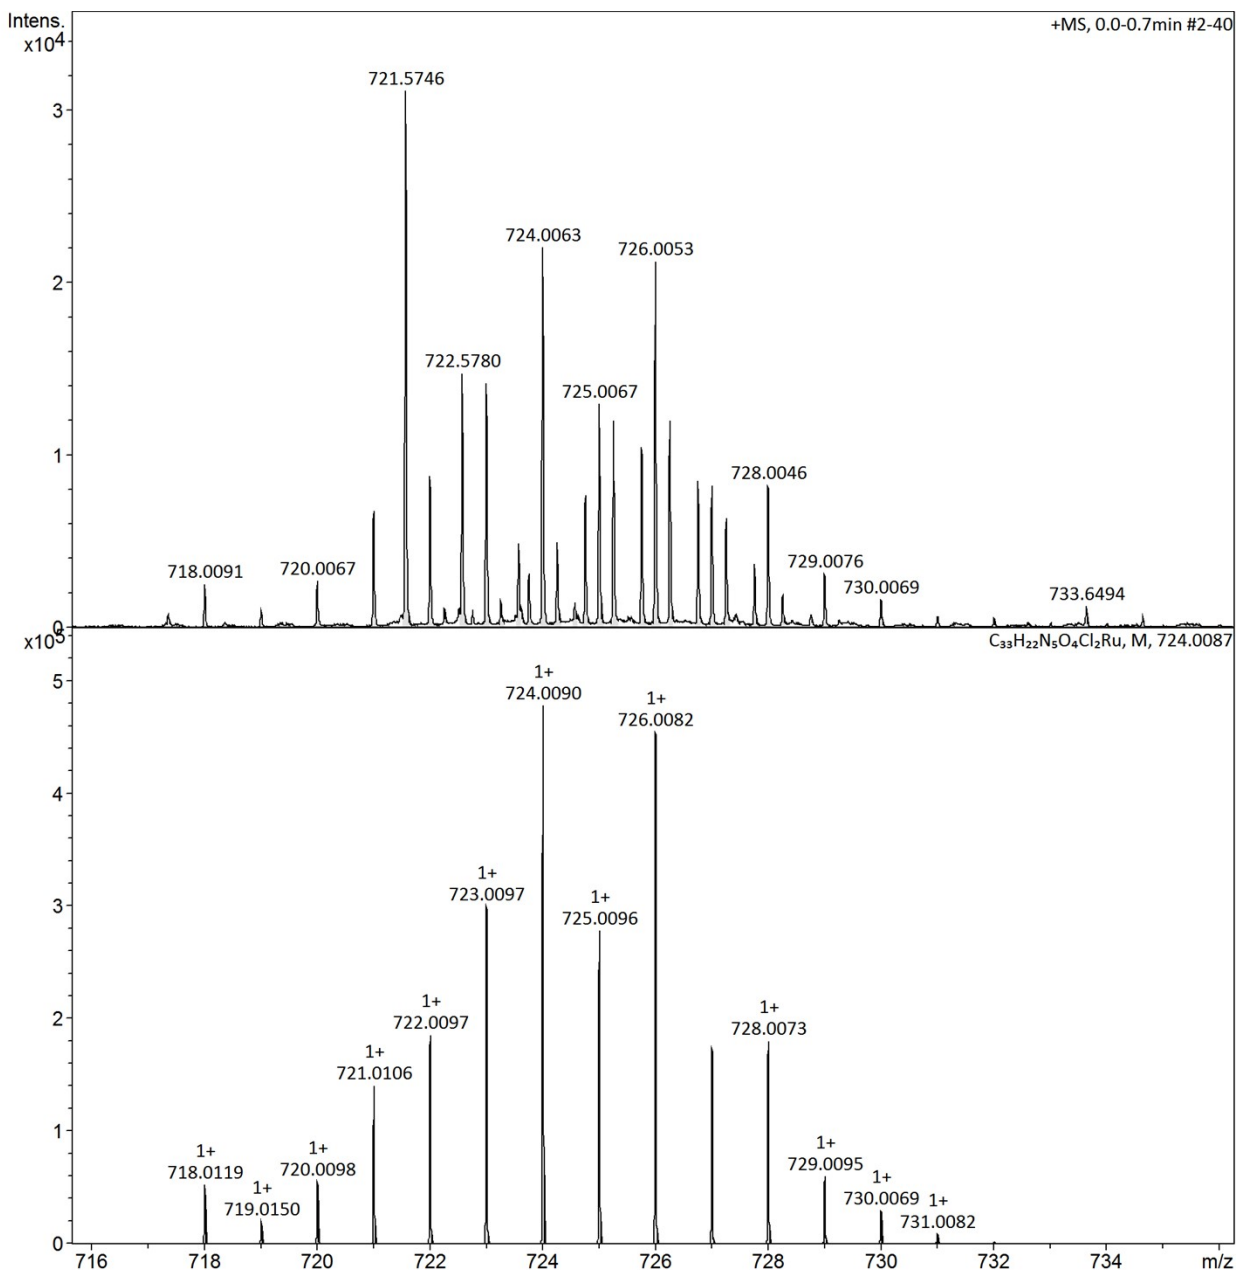

**Fig. S13.** ESI mass spectrum of complex **7** dissolved in acetonitrile. The spectrum was acquired in positive mode. Instrumental settings were: the source voltage was 3.5 kV, the flow rates were 180  $\mu$ L/hour, the drying gas ( $N_2$ ), to aid solvent removal, was held at 180  $^{\circ}C$  and the spray gas was held at 20  $^{\circ}C$ . The theoretical and experimentally obtained isotopic distributions are shown in parallel.

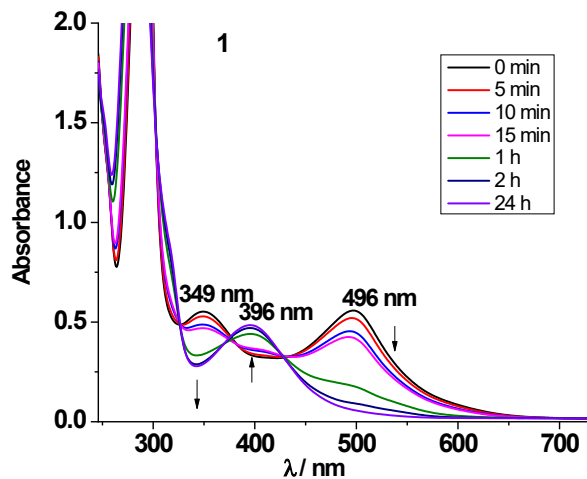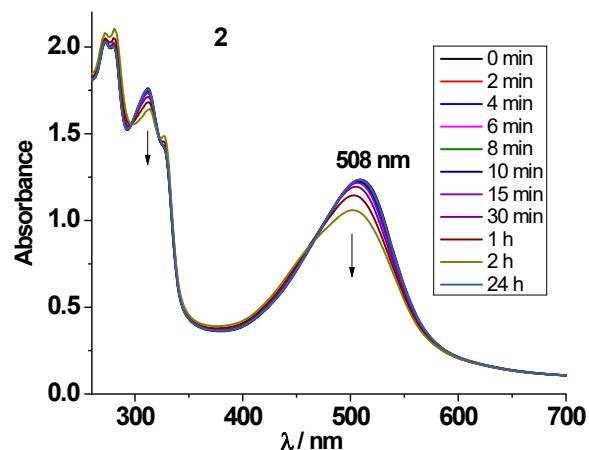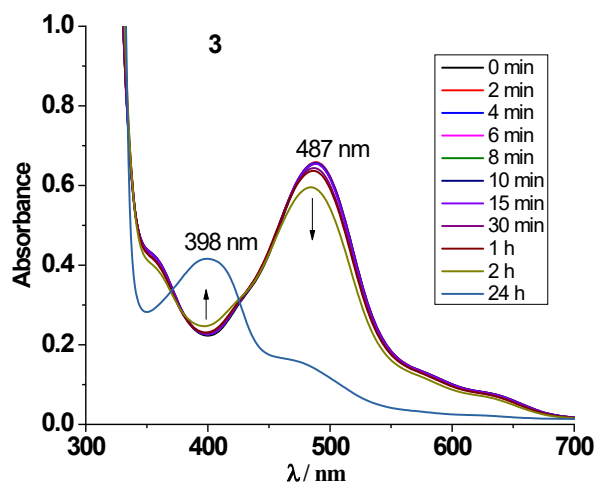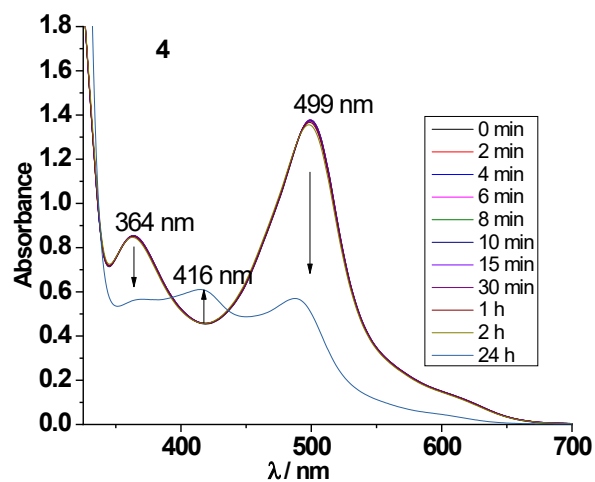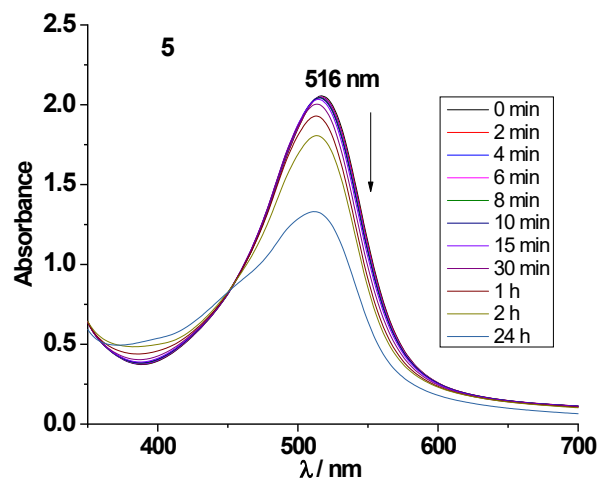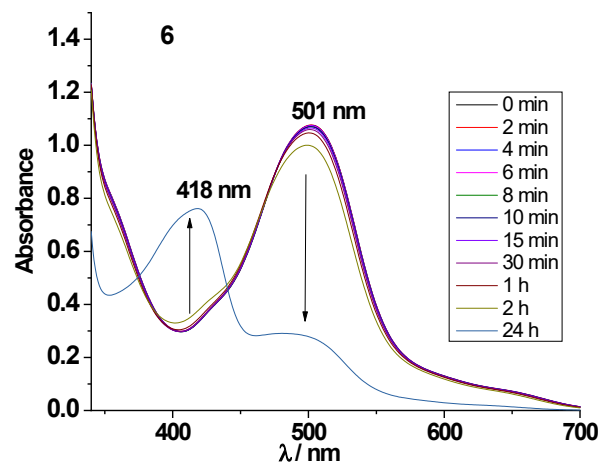

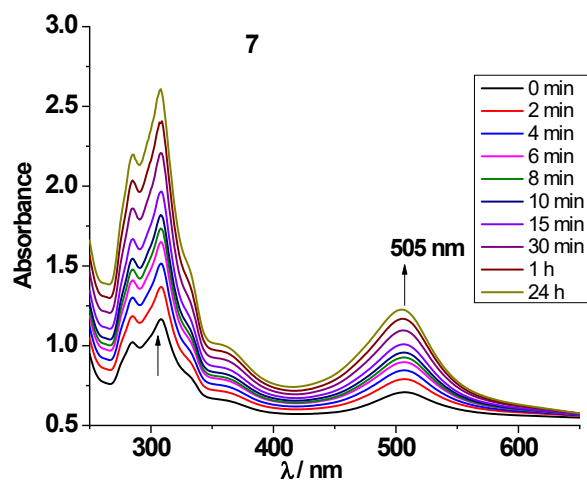

**Fig. S14.** UV-Vis spectra of complexes 1 – 7 in water over a 24 h period.  $[\text{Ru}(\text{II})] = 1 \times 10^{-4} \text{ M}$ ,  $T = 298 \text{ K}$ .

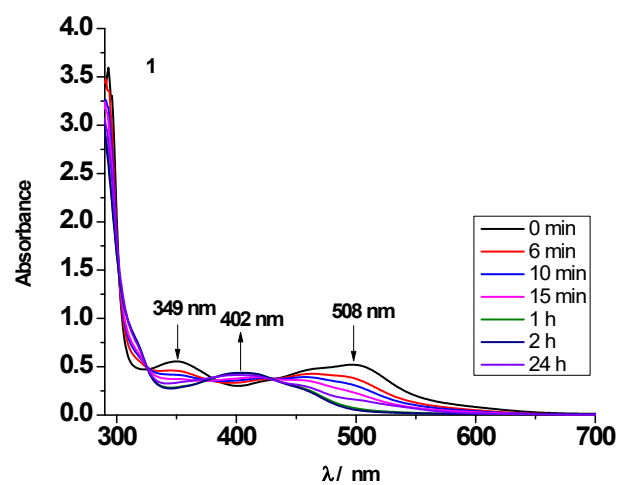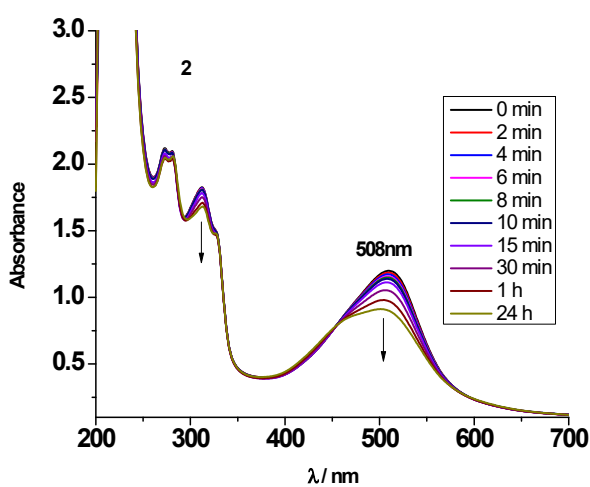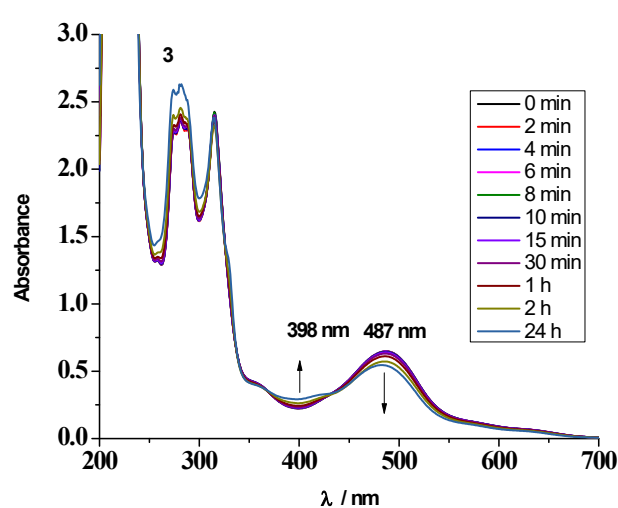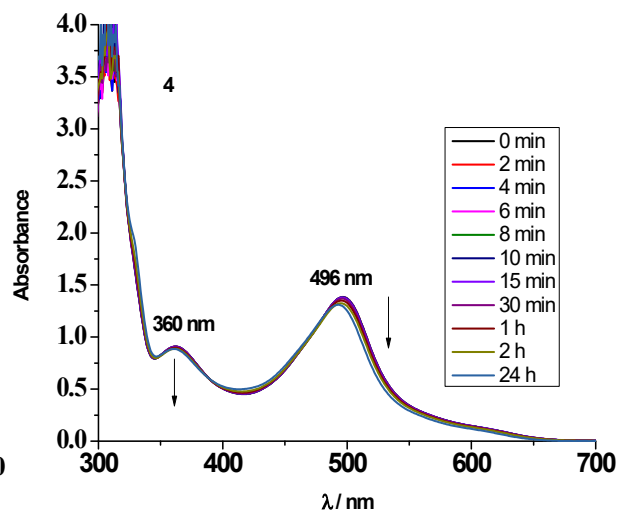



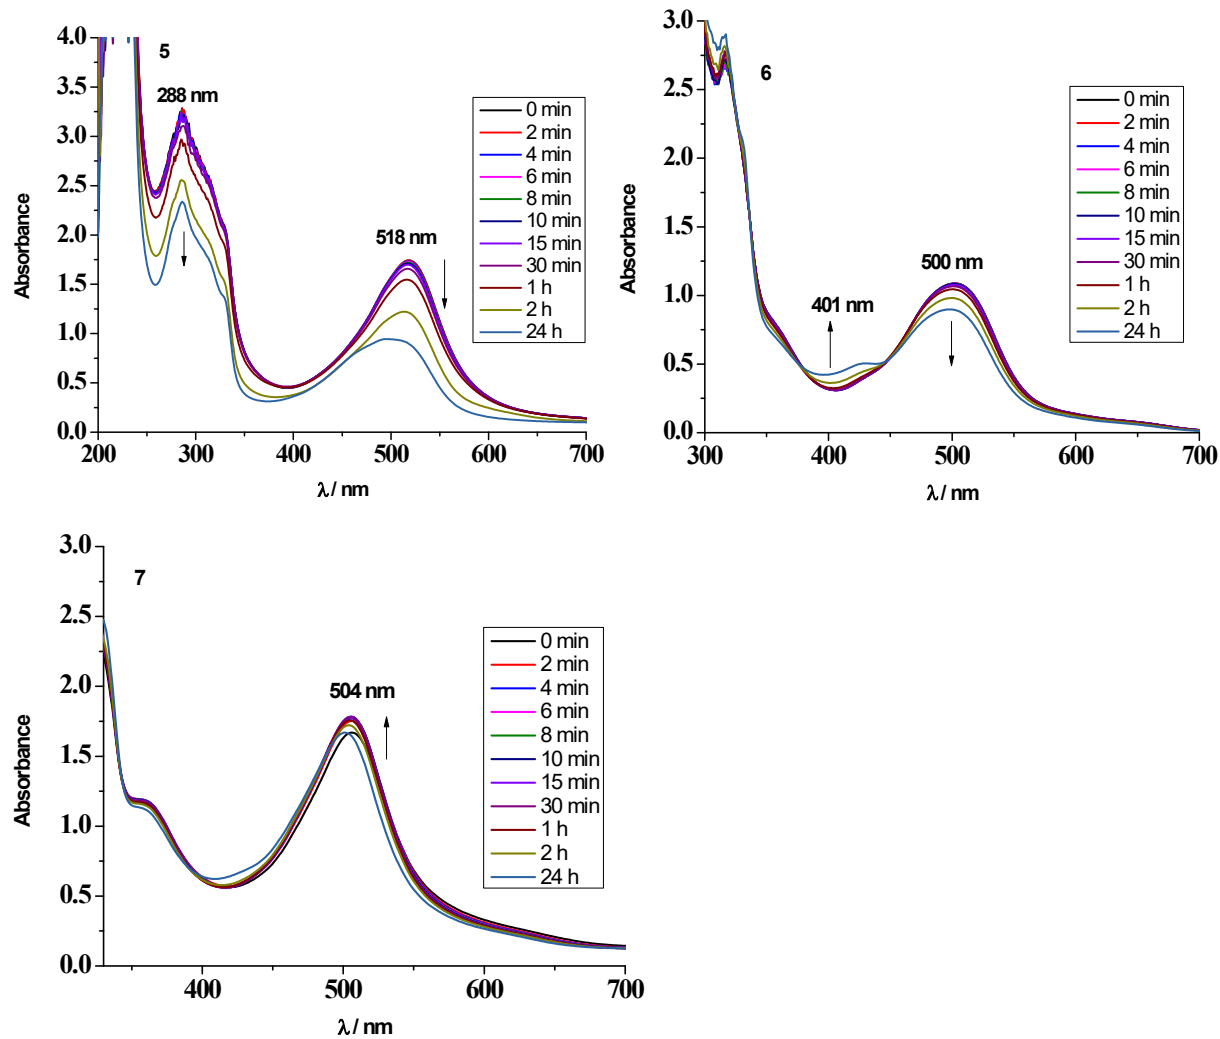

**Fig. S15.** UV-Vis spectra of complexes **1** – **7** in 10 mM PBS over a 24 h period.  $[\text{Ru(II)}] = 1 \times 10^{-4} \text{ M}$ ,  $T = 298 \text{ K}$ .

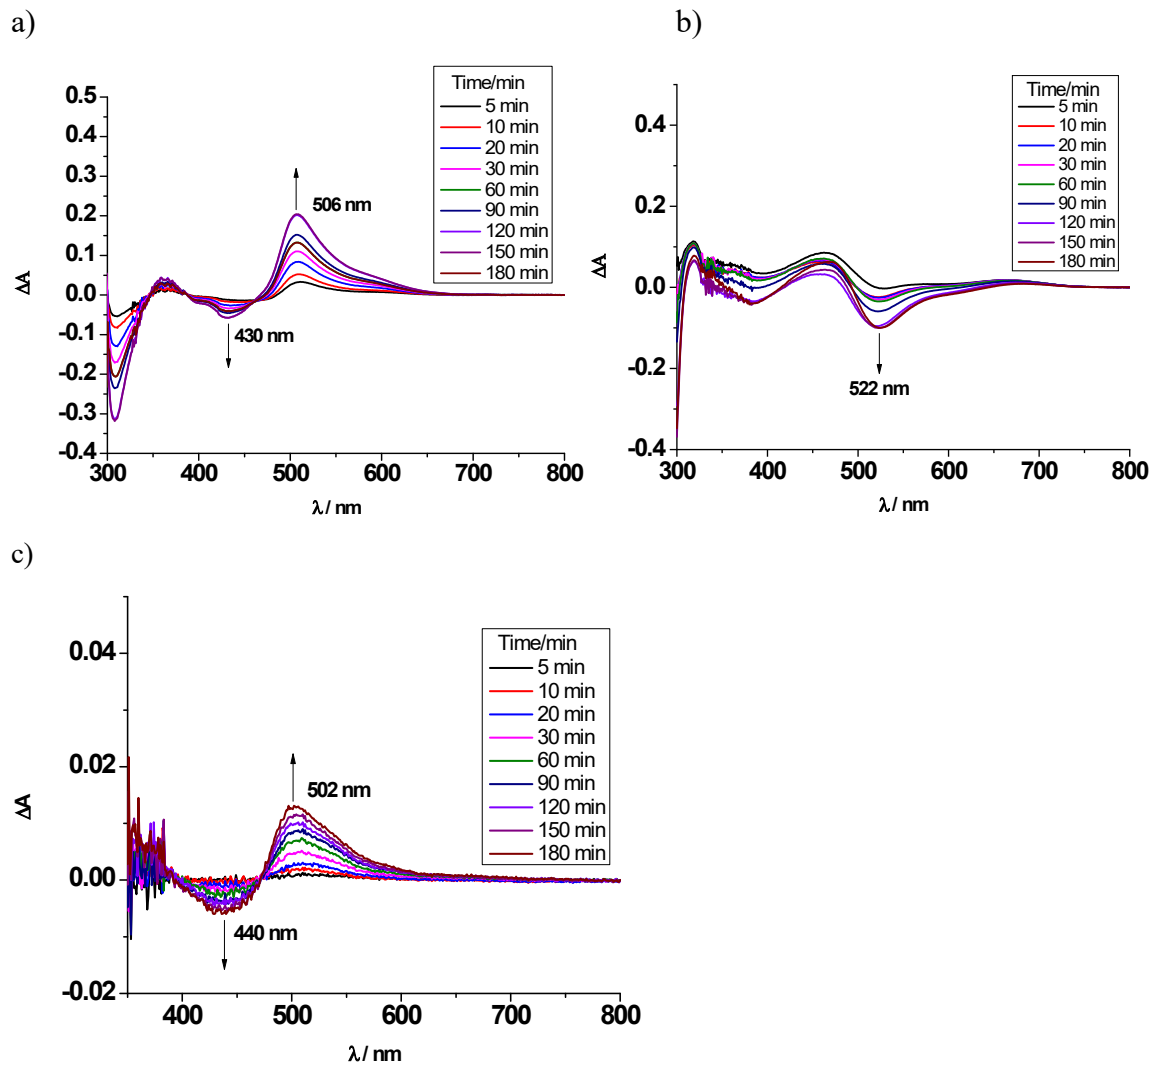

**Fig. S16.** Time evolution of UV-Vis difference spectra during the interaction of complex **1** with 5'-GMP (a), L-Cys (b) and L-Met (c).

a)

b)

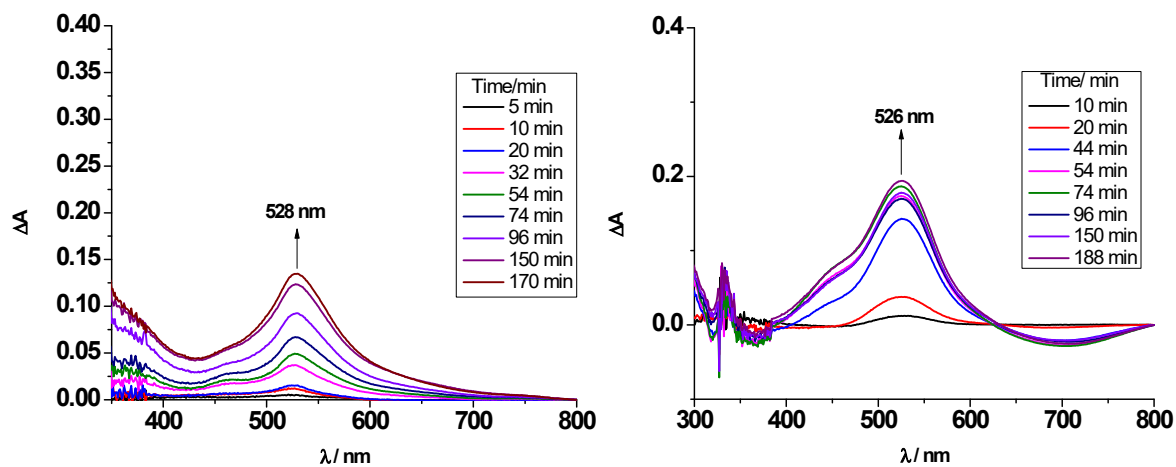

c)

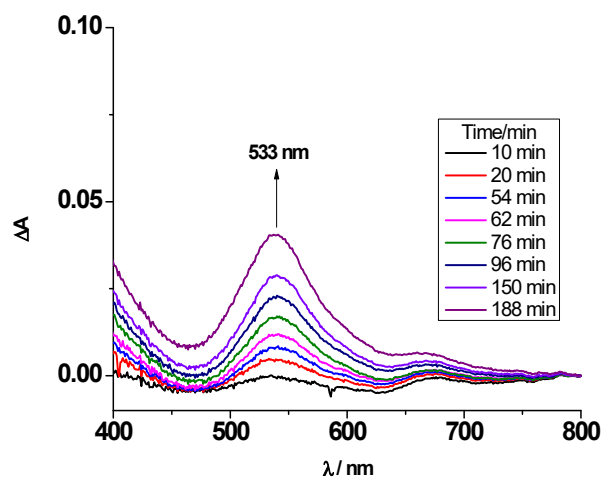

**Fig. S17.** Time evolution of UV-Vis difference spectra during the interaction of complex **2** with 5'-GMP (a), L-Cys (b) and L-Met (c).

a)

b)

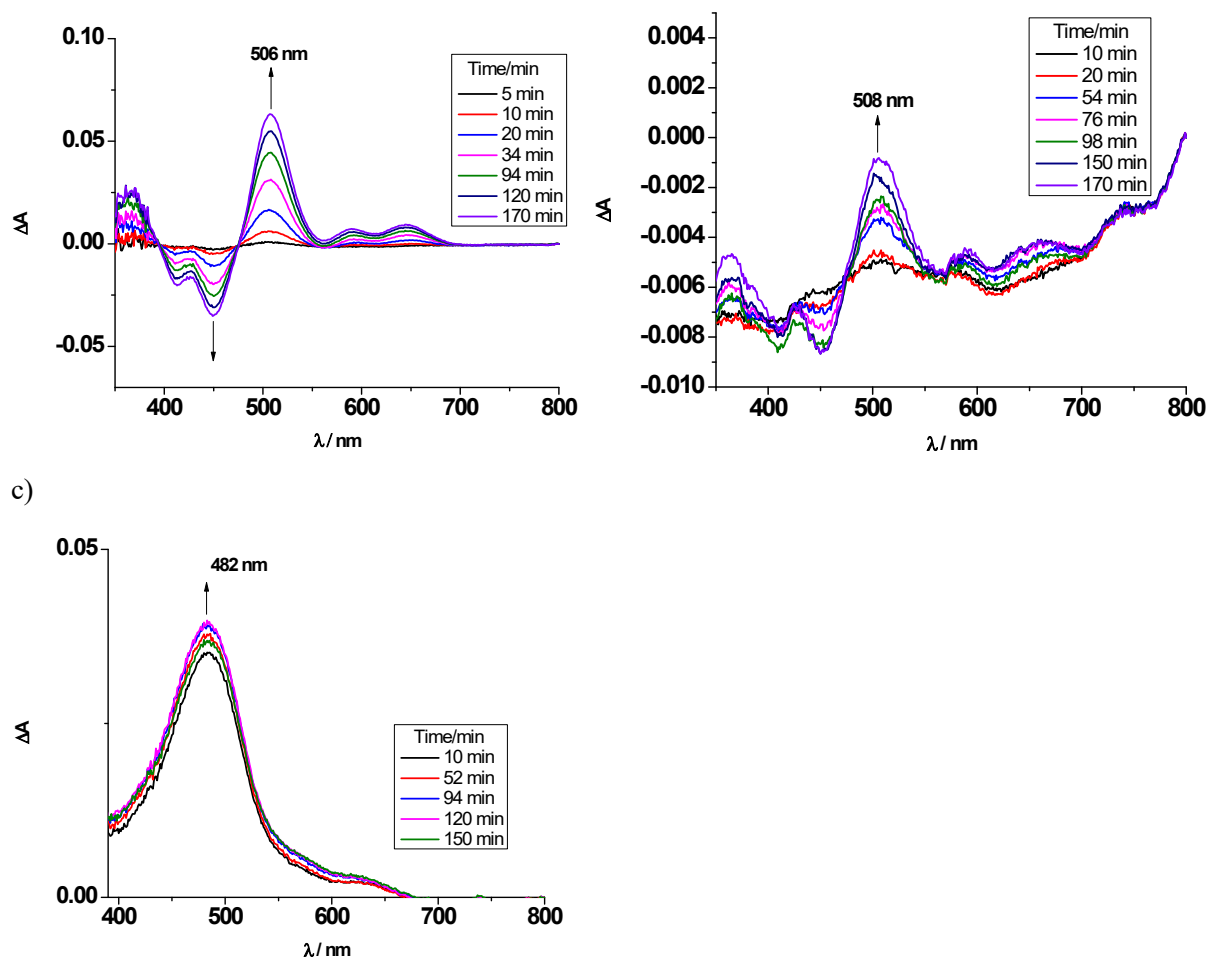

**Fig. S18.** Time evolution of UV-Vis difference spectra during the interaction of complex **3** with 5'-GMP (a), L-Cys (b) and L-Met (c).

a)

b)

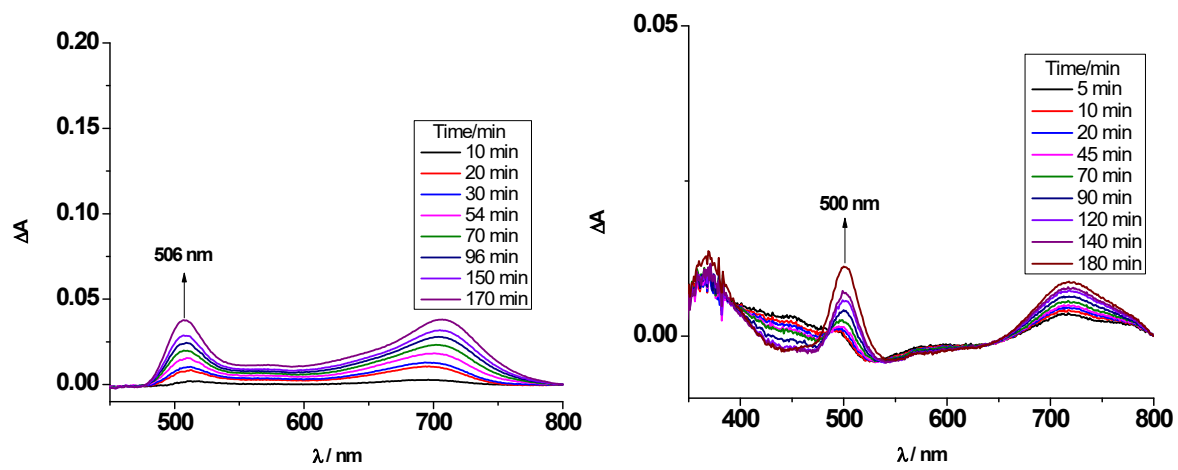

c)

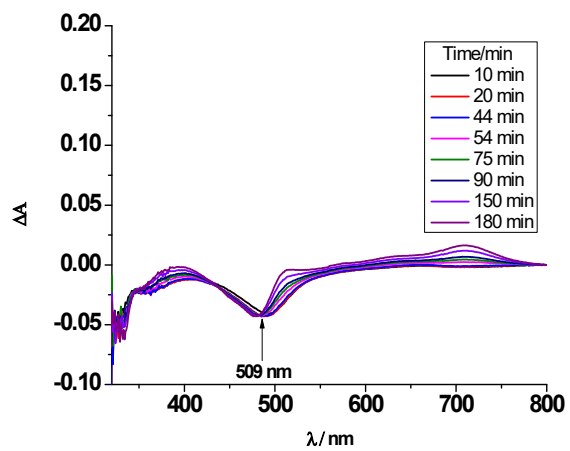

**Fig. S19.** Time evolution of UV-Vis difference spectra during the interaction of complex **4** with 5'-GMP (a), L-Cys (b) and L-Met (c).

a)

b)

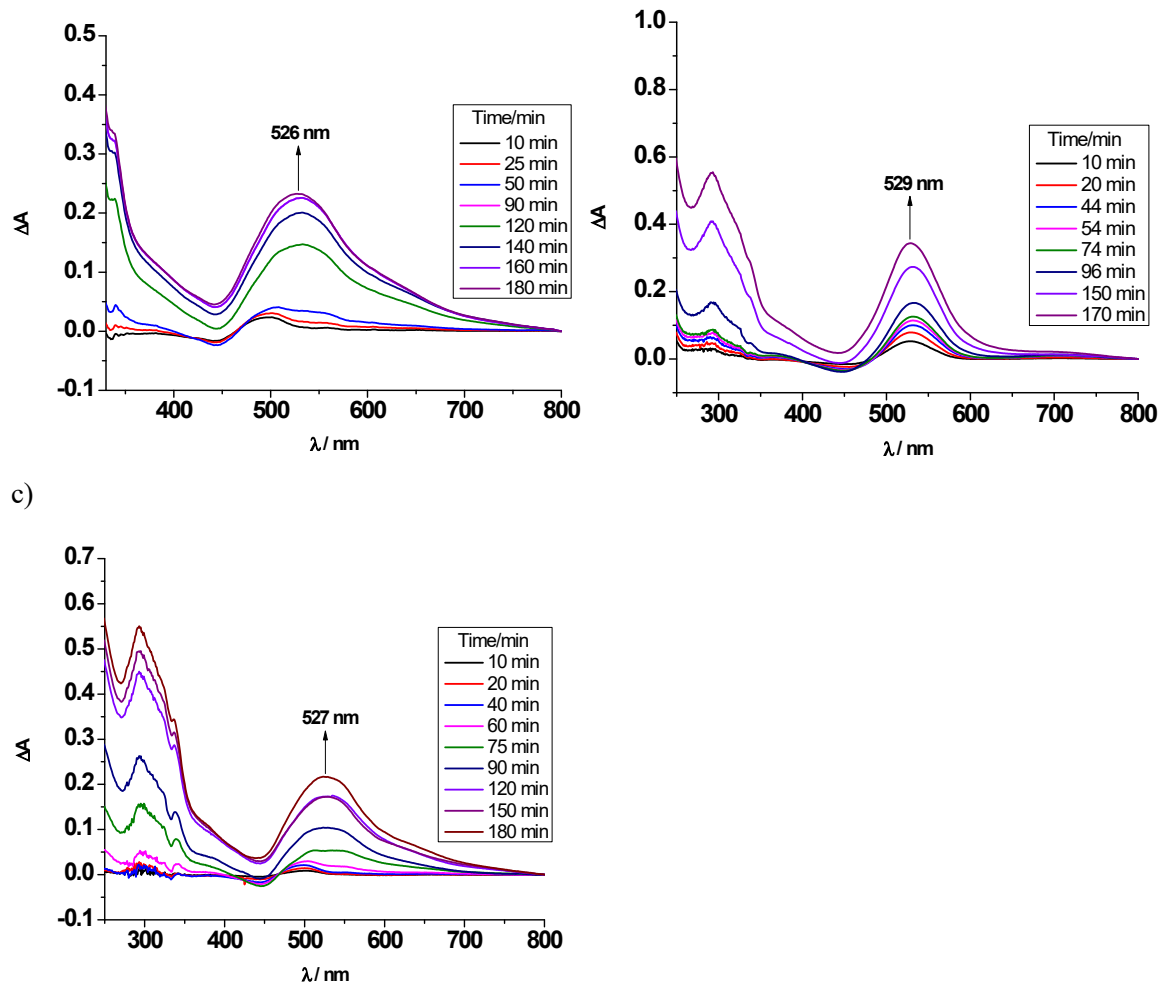

**Fig. S20.** Time evolution of UV-Vis difference spectra during the interaction of complex **5** with 5'-GMP (a), L-Cys (b) and L-Met (c).

a)

b)

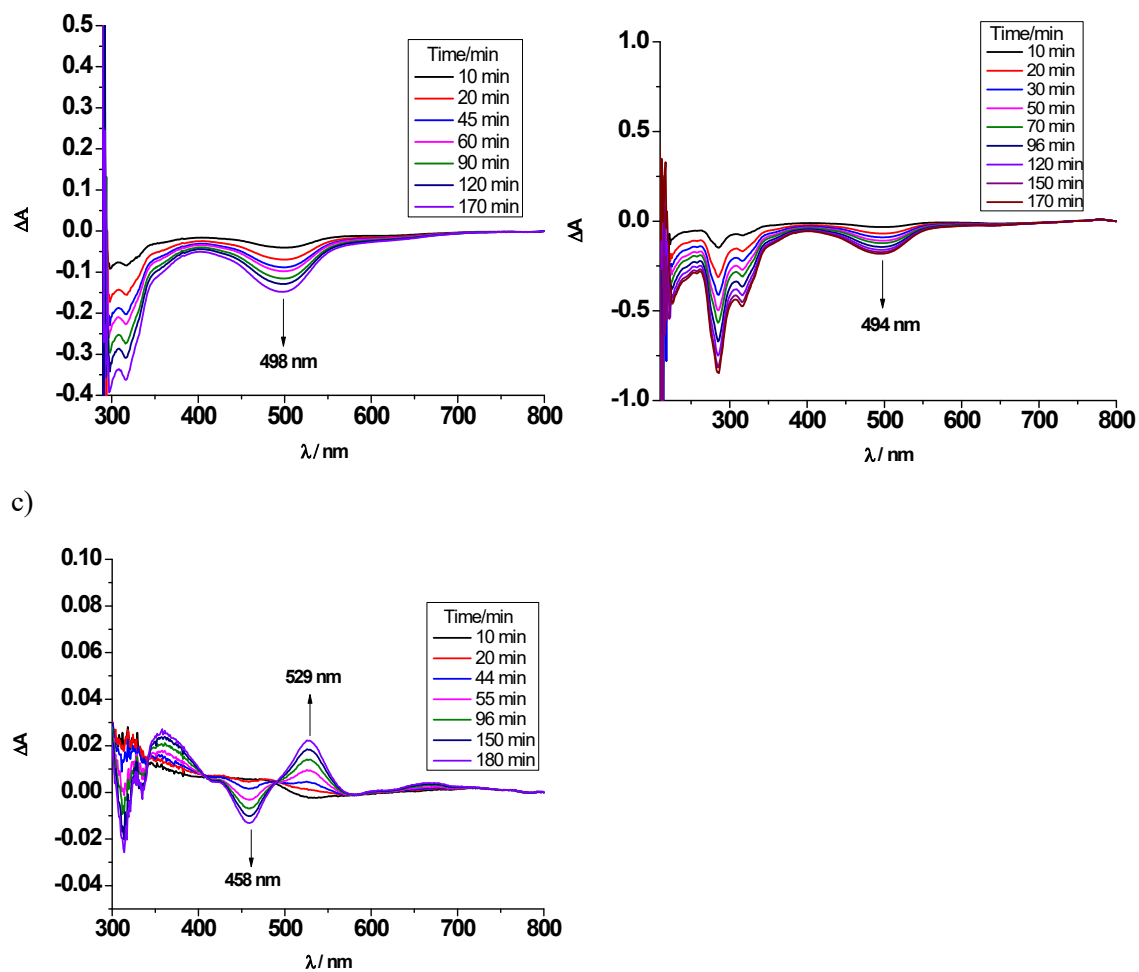

**Fig. S21.** Time evolution of UV-Vis difference spectra during the interaction of complex 6 with 5'-GMP (a), L-Cys (b) and L-Met (c).

a)

b)

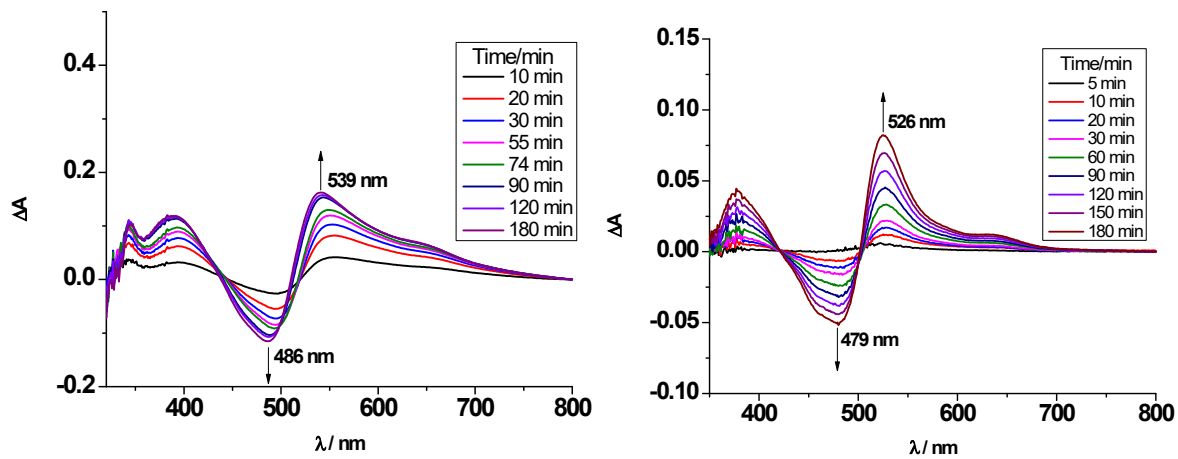

c)

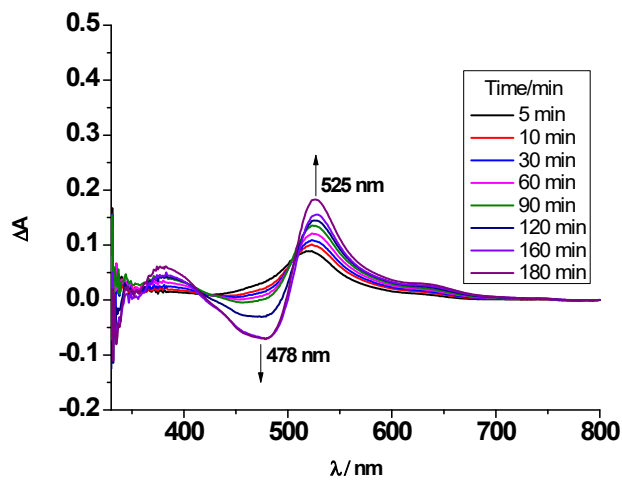

**Fig. S22.** Time evolution of UV-Vis difference spectra during the interaction of complex 7 with 5'-GMP (a), L-Cys (b) and L-Met (c).

(a)

b)



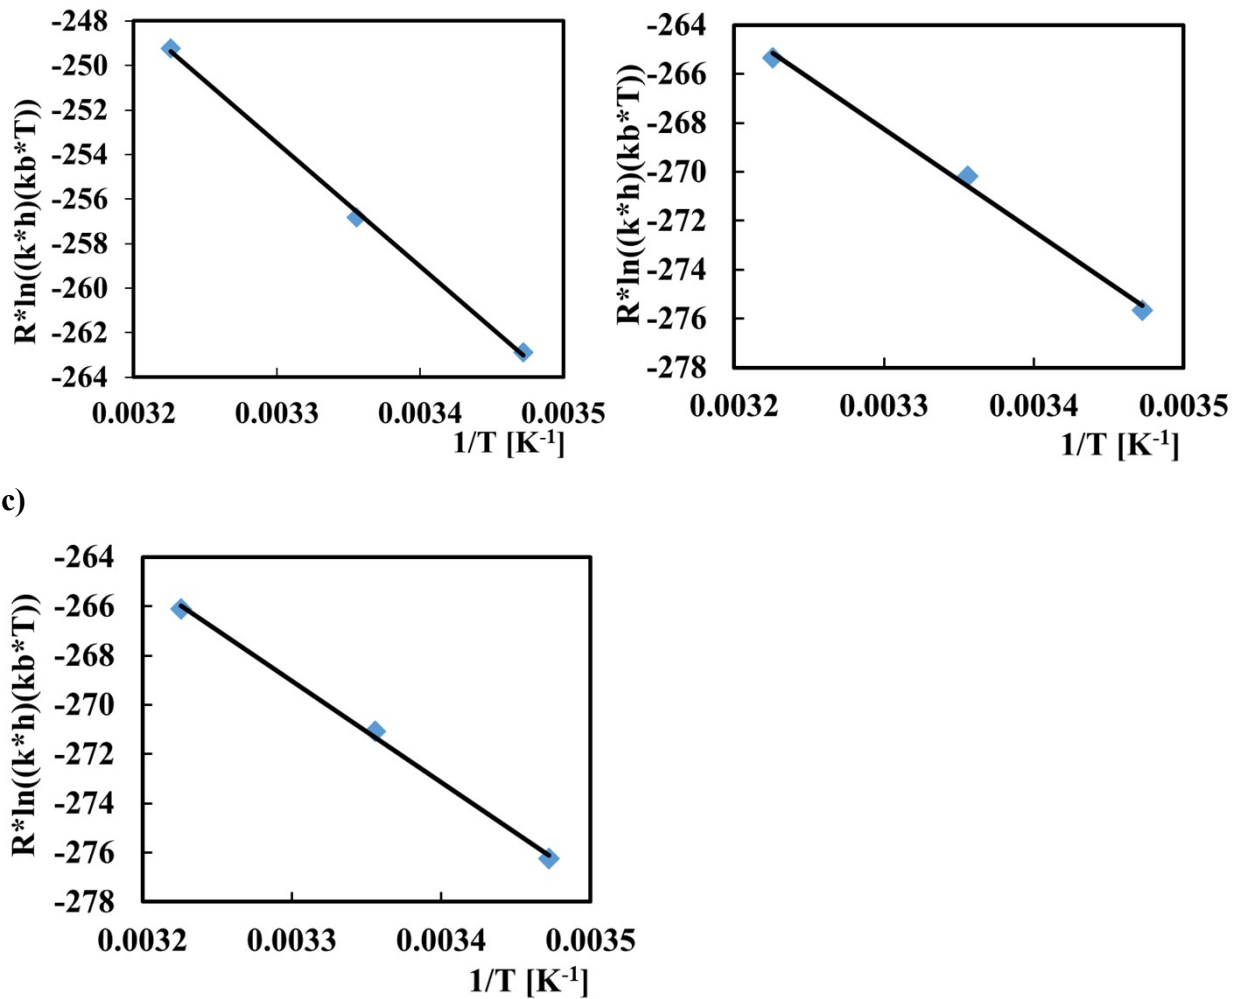

Fig. S23. Eyring plots for the reactions of complex 1 with 5'-GMP (a), L-Cys (b) and L-Met (c).

## DNA-binding studies

### Calculation of the DNA-binding constants

In order to compare quantitatively the binding strength of complexes, the intrinsic binding constants  $K_b$  were determined by monitoring the changes in absorption at the MLCT band with increasing concentration of CT DNA using the following equation (S1)<sup>S1</sup>

$$[\text{DNA}]/(\varepsilon_A - \varepsilon_f) = [\text{DNA}]/(\varepsilon_b - \varepsilon_f) + 1/[K_b(\varepsilon_b - \varepsilon_f)] \quad (\text{S1})$$

$K_b$  is given by the ratio of the slope to the  $y$  intercept in plots  $[\text{DNA}]/(\varepsilon_A - \varepsilon_f)$  vs.  $[\text{DNA}]$  (Fig. S39), where  $[\text{DNA}]$  is the concentration of DNA in base pairs,  $\varepsilon_A = A_{\text{obsd}}/[\text{complex}]$ ,  $\varepsilon_f$  is the extinction coefficient for the unbound complex and  $\varepsilon_b$  is the extinction coefficient for the complex in the fully bound form.

### Stern-Volmer equation for EB and Hoechst competitive studies

The relative binding of complexes to CT-DNA is described by Stern-Volmer equation (S2)<sup>S2</sup>:

$$I_0/I = 1 + K_{sv}[Q] \quad (\text{S2})$$

where  $I_0$  and  $I$  are the emission intensities in the absence and in the presence of the quencher (complexes **1**, **2** or **3**), respectively,  $[Q]$  is the total concentration of quencher,  $K_{sv}$  is the Stern-Volmer quenching constant, which can be obtained from the slope of the plot of  $I_0/I$  vs.  $[Q]$  (Fig. S41).

### Stern-Volmer equation for HSA quenching studies

Fluorescence quenching is described by Stern–Volmer equation:

$$I_0/I = 1 + k_q \tau_0 [Q] = 1 + K_{sv}[Q] \quad (\text{S3})$$

where  $I_0$  = the initial tryptophan fluorescence intensity of HSA,  $I$  = the tryptophan fluorescence intensity of HSA after the addition of the quencher,  $k_q$  = the quenching rate constants of HSA,  $K_{sv}$  = Stern-Volmer quenching constant,  $\tau_0$  = the average lifetime of HSA without the quencher,  $[Q]$  = the concentration of the quencher respectively.

$$K_{sv} = k_q \tau_0 \quad (\text{S4})$$

and, taking as fluorescence lifetime ( $\tau_0$ ) of tryptophan in HSA at around  $10^{-8}$  s,  $K_{sv}$  ( $M^{-1}$ ) can be obtained by the slope of the diagram  $I_0/I$  vs.  $[Q]$  (Stern-Volmer plots, Fig. S44), and subsequently the approximate  $k_q$  ( $M^{-1} s^{-1}$ ) may be calculated.<sup>S2</sup>

### Scatchard equation for HSA quenching studies

From Scatchard equation:

$$\log (I_0 - I/I) = \log K_b + n \log [Q] \quad (\text{S5})$$

where,  $K_b$  and  $n$  are the binding constant and the number of the binding sites, respectively. The number of the binding sites and the binding constant have been obtained from the slope and intercept of the linear plot of  $\log[(I_0 - I)/I]$  vs.  $\log [Q]$ .

### References

- S1.** A. M. Pyle, J. P. Rehmann, R. Meshoyrer, C. V. Kumar, N. J. Turro and J. K. Barton, *J. Am. Chem. Soc.*, 1989, **111**, 3051-3058.
- S2.** R. Lakowicz and G. Weber, *Biochemistry*, 1973, **12**, 4161-4170.
- S3.** S. Wu, W. Yuan, H. Wang, Q. Zhang, M. Liu, K. Yu, *J. Inorg. Biochem.*, 2008, **102**, 2026-2034.\

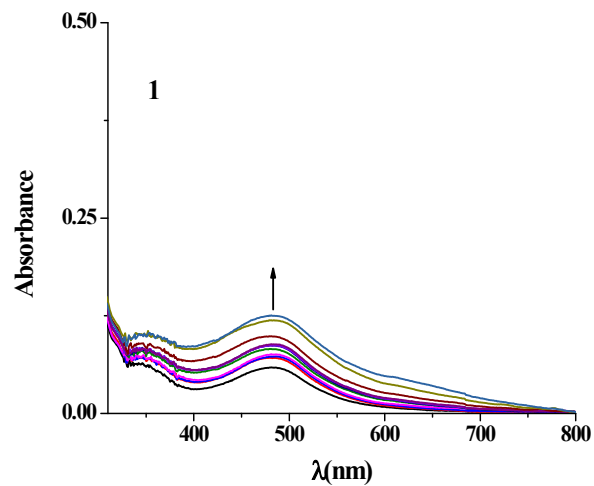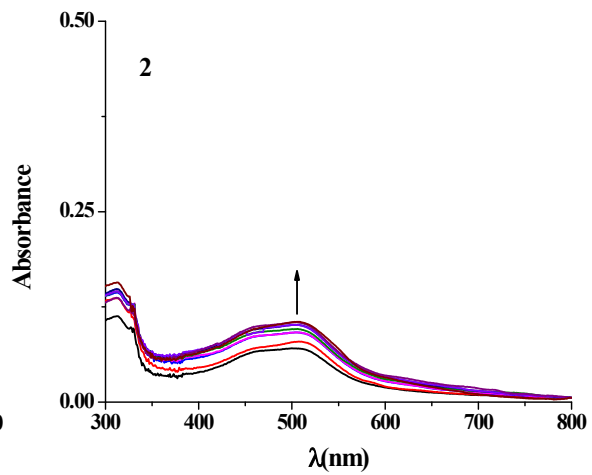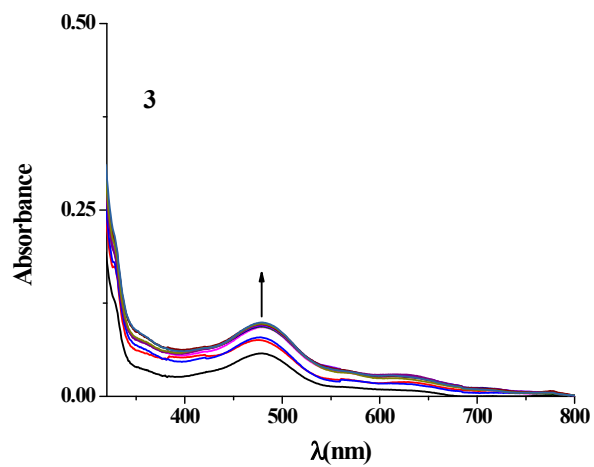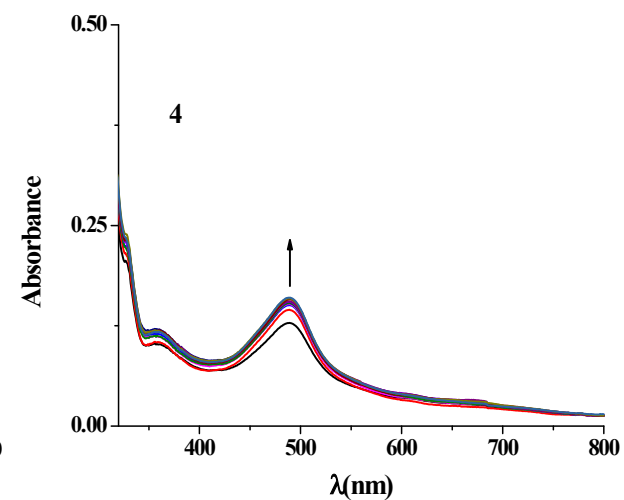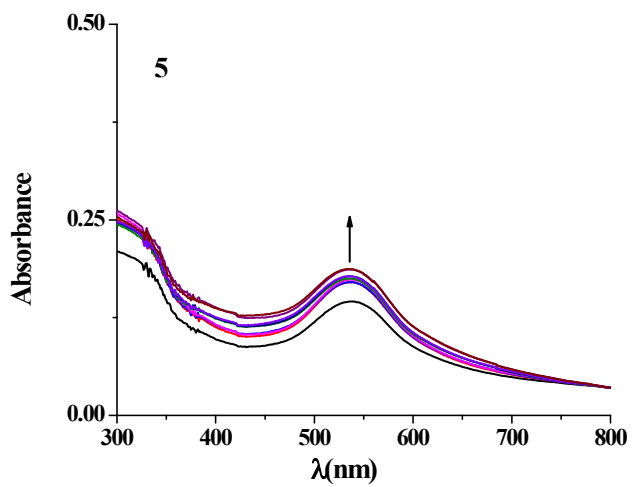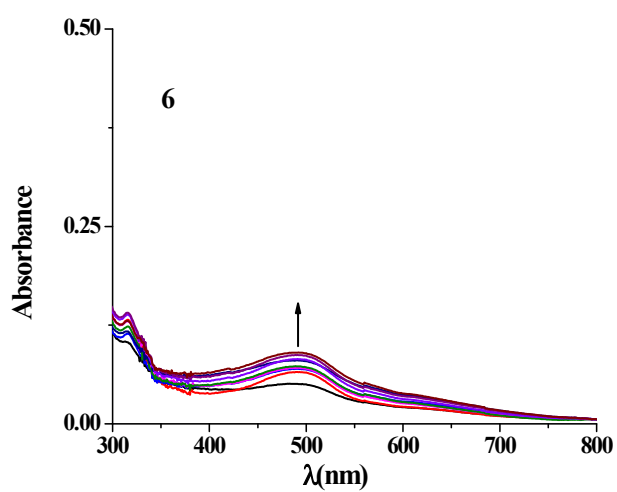

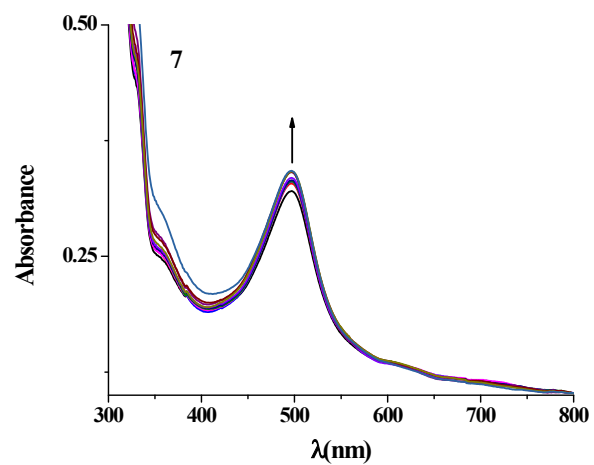

**Fig. S24.** Absorption spectra of complexes **1–7** in 10 mM PBS upon addition of CT DNA.  $[\text{Ru}] = 1.00 \times 10^{-5}$ ,  $[\text{DNA}] = (0-2) \times 10^{-5}$  M. Arrows show the absorbance changing upon increasing CT DNA concentrations.

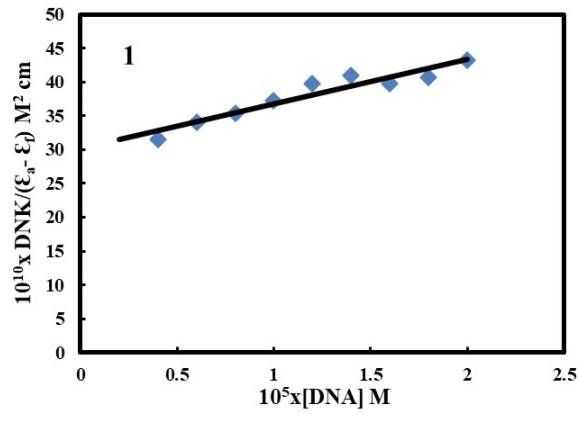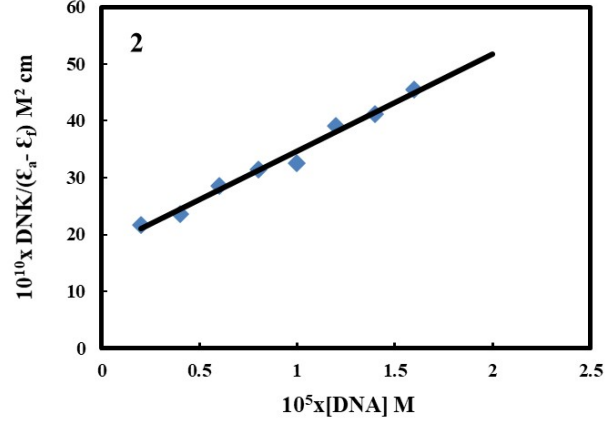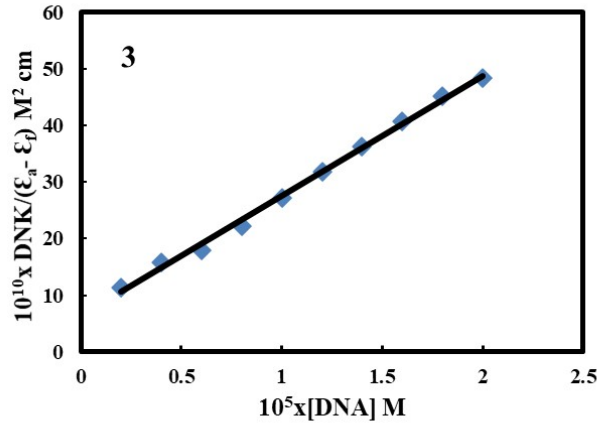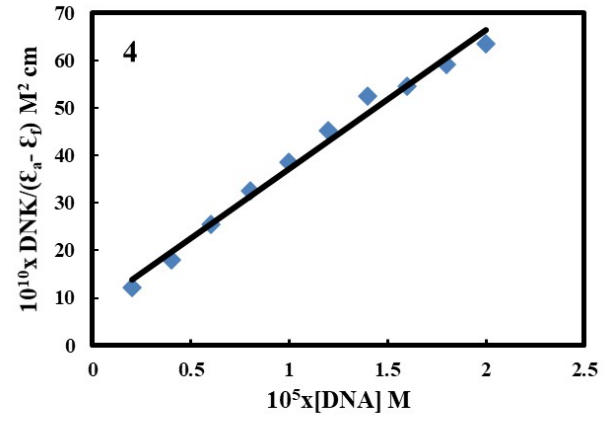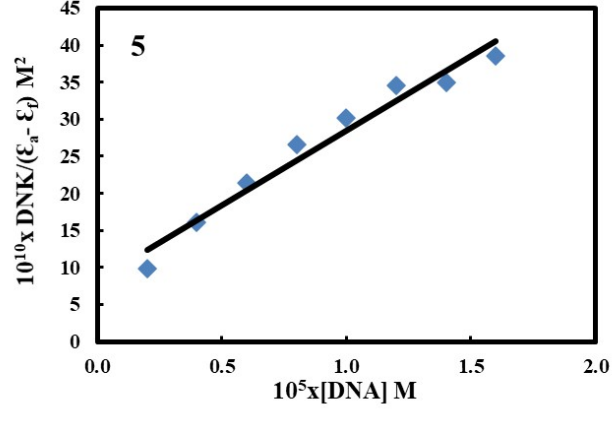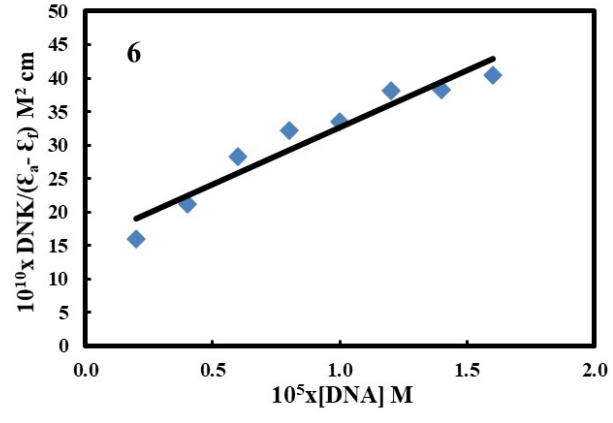

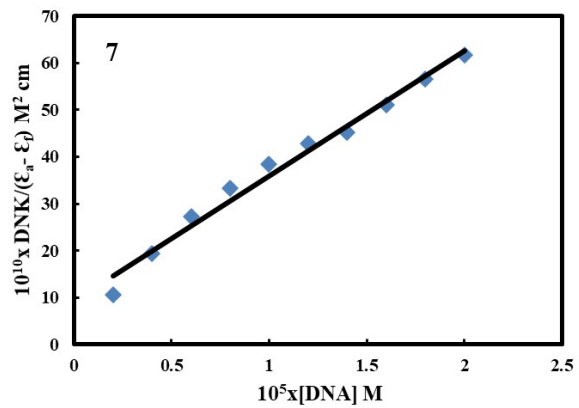

**Fig. S25.** Plots of  $[\text{DNA}] / (\epsilon_A - \epsilon_f)$  vs.  $[\text{DNA}]$  for complexes **1–7**.

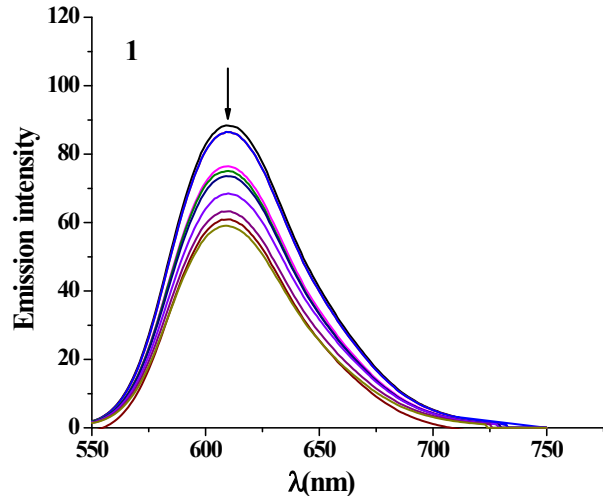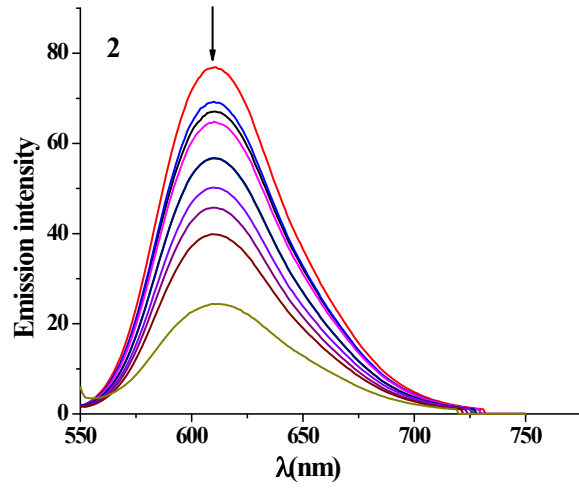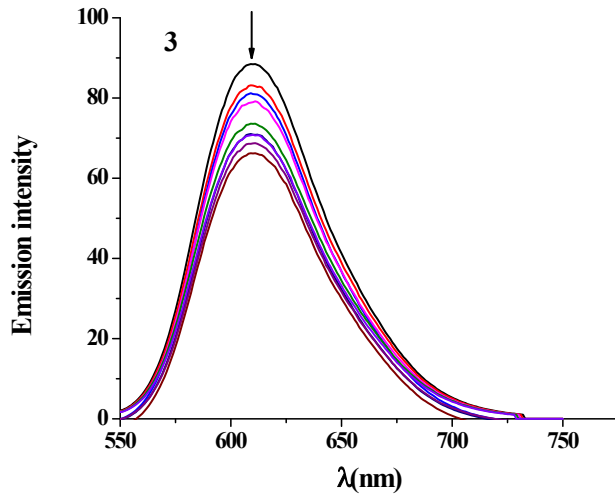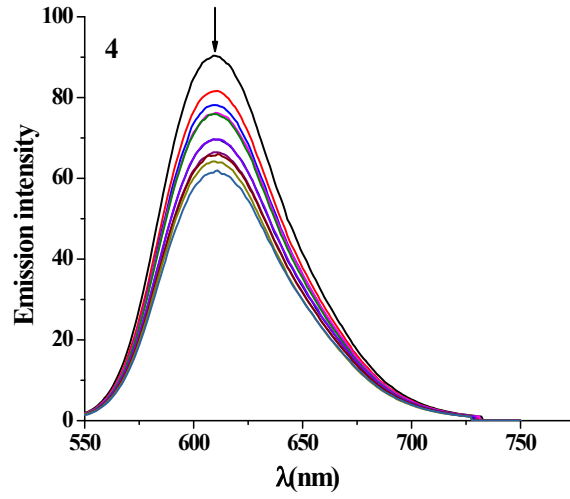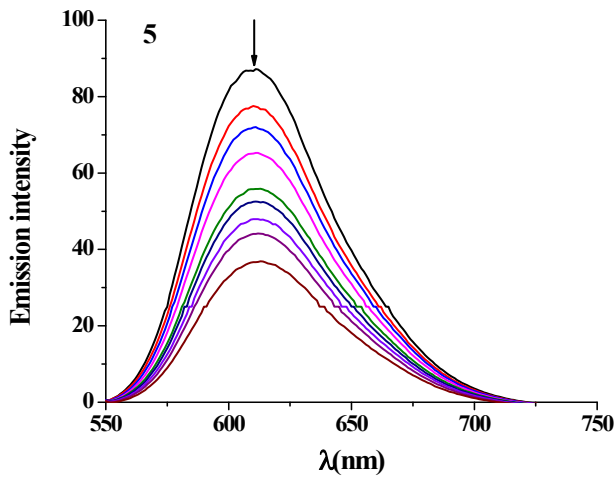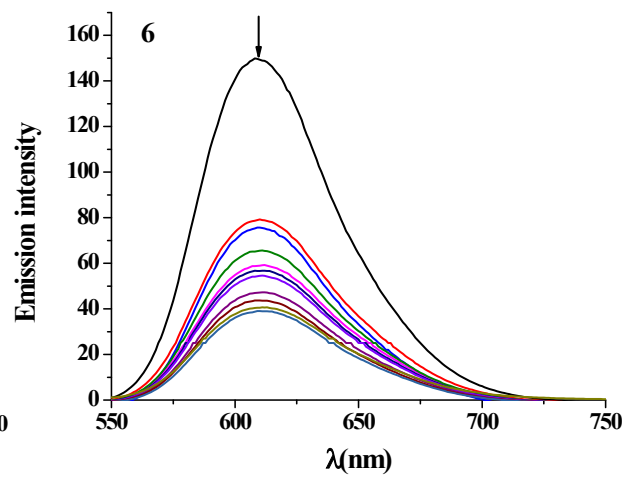



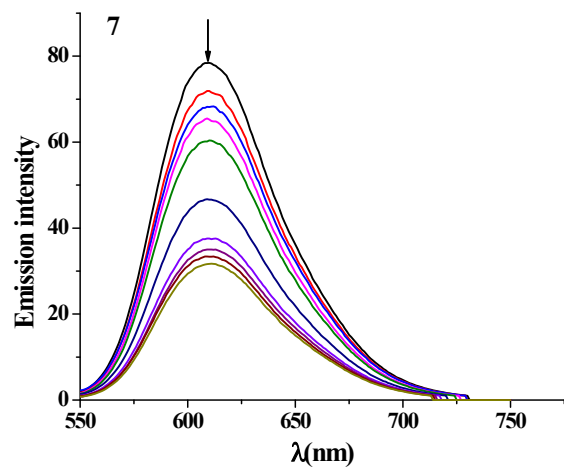

**Fig. S26.** Emission spectra of EB bound to DNA in the presence of complexes **1–7**.  $[\text{EB}] = 28,6 \mu\text{M}$ ,  $[\text{DNA}] = 28,6 \mu\text{M}$ ;  $[\text{Ru}] = 0\text{--}57,2 \mu\text{M}$ ;  $\lambda_{\text{ex}} = 527 \text{ nm}$ . The arrows show the change of the intensity upon increasing the concentration of complexes.

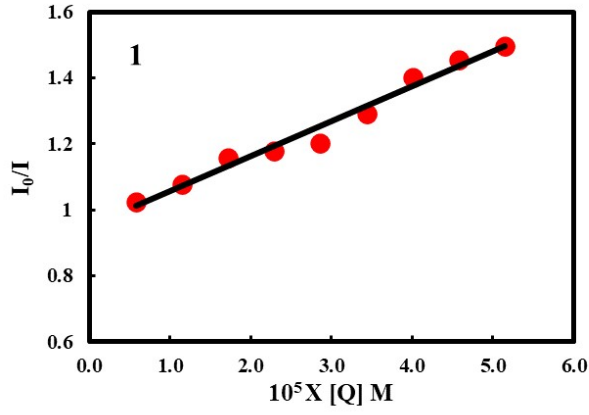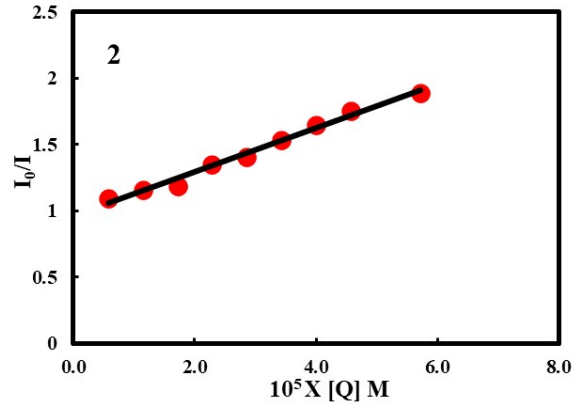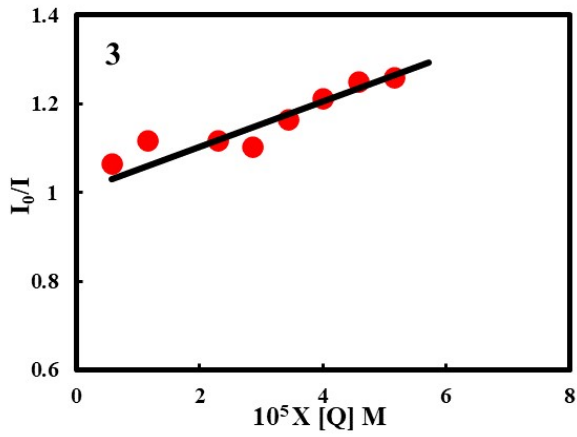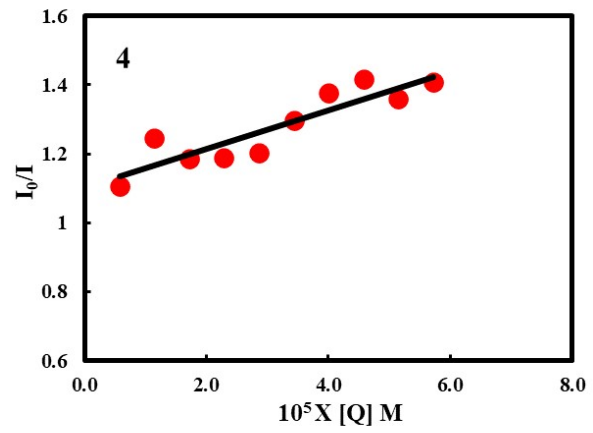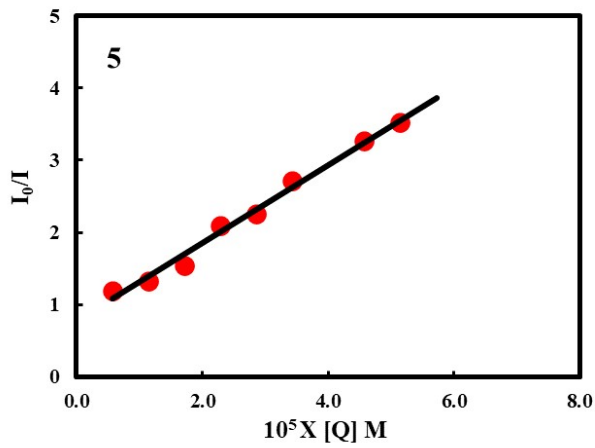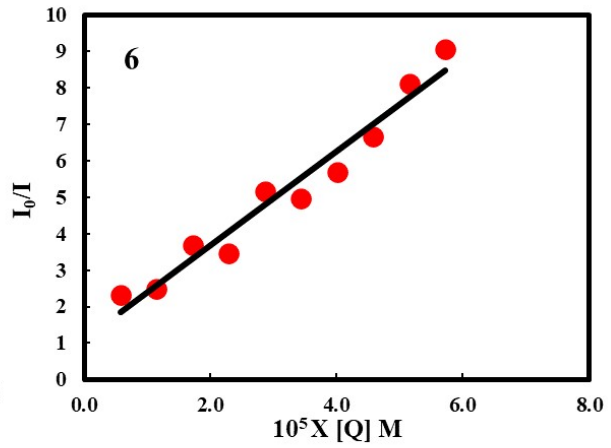

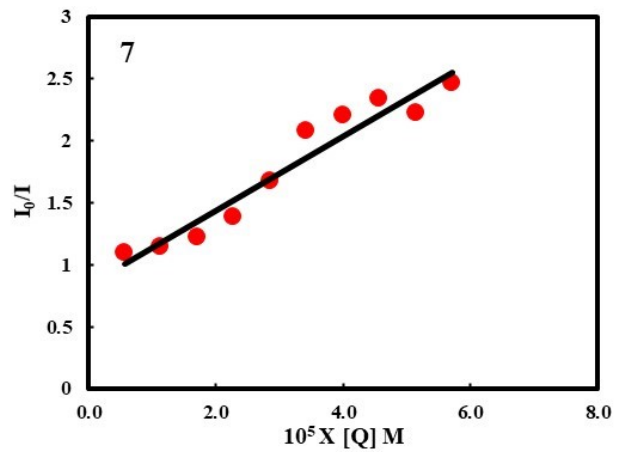

**Fig. S27.** Stern-Volmer quenching plot of EB-DNA for complexes 1–7.

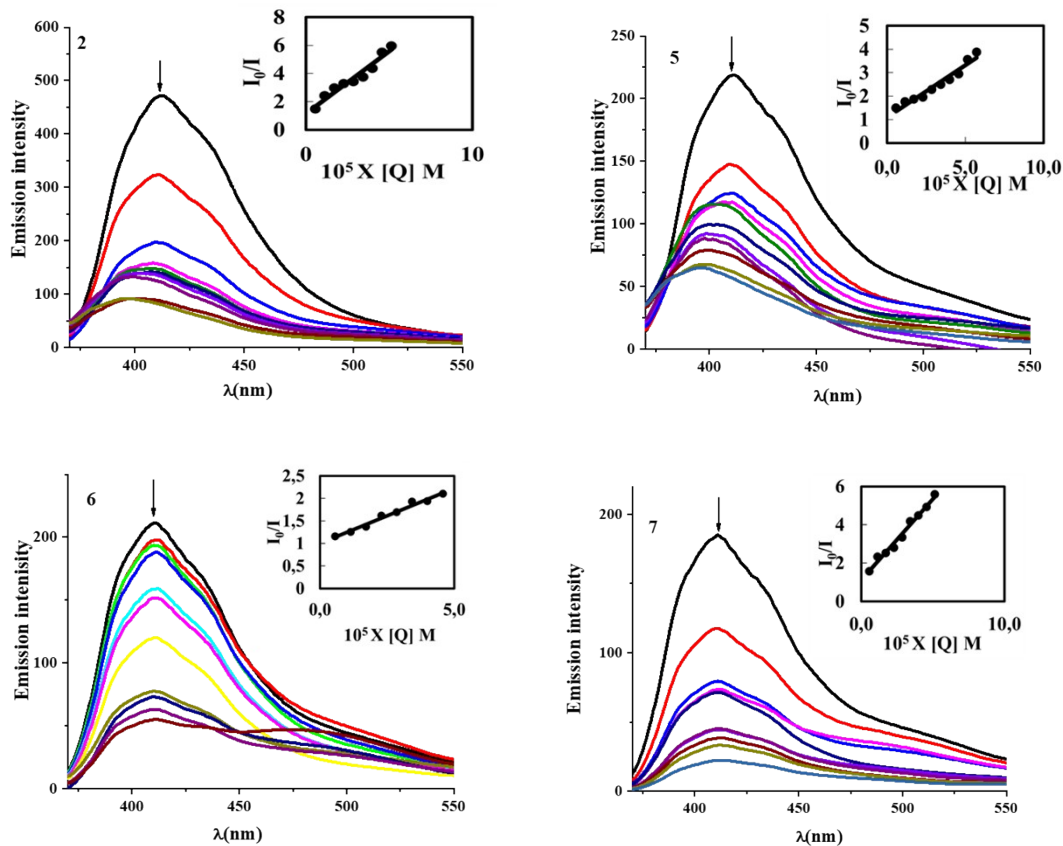

**Fig. S28.** Fluorescence spectra of Hoechst-CT DNA in the presence of varying amounts of complexes **2**, **5**, **6** and **7** in 10 mM PBS. Arrow shows the changes in fluorescence intensity upon increasing the concentration of complexes **2**, **5**, **6** and **7**. Insert graph: Stern-Volmer plots of Hoechst-CT DNA for complexes **2**, **5**, **6** and **7**.

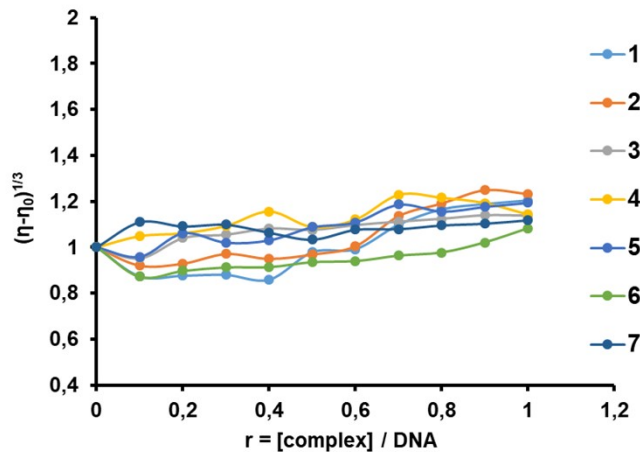

**Fig. S29.** Relative viscosity  $(\eta/\eta_0)^{1/3}$  of CT DNA (0.01 mM) in 10 mM PBS in the presence of the increasing amounts of complexes **1–7** (*r*).

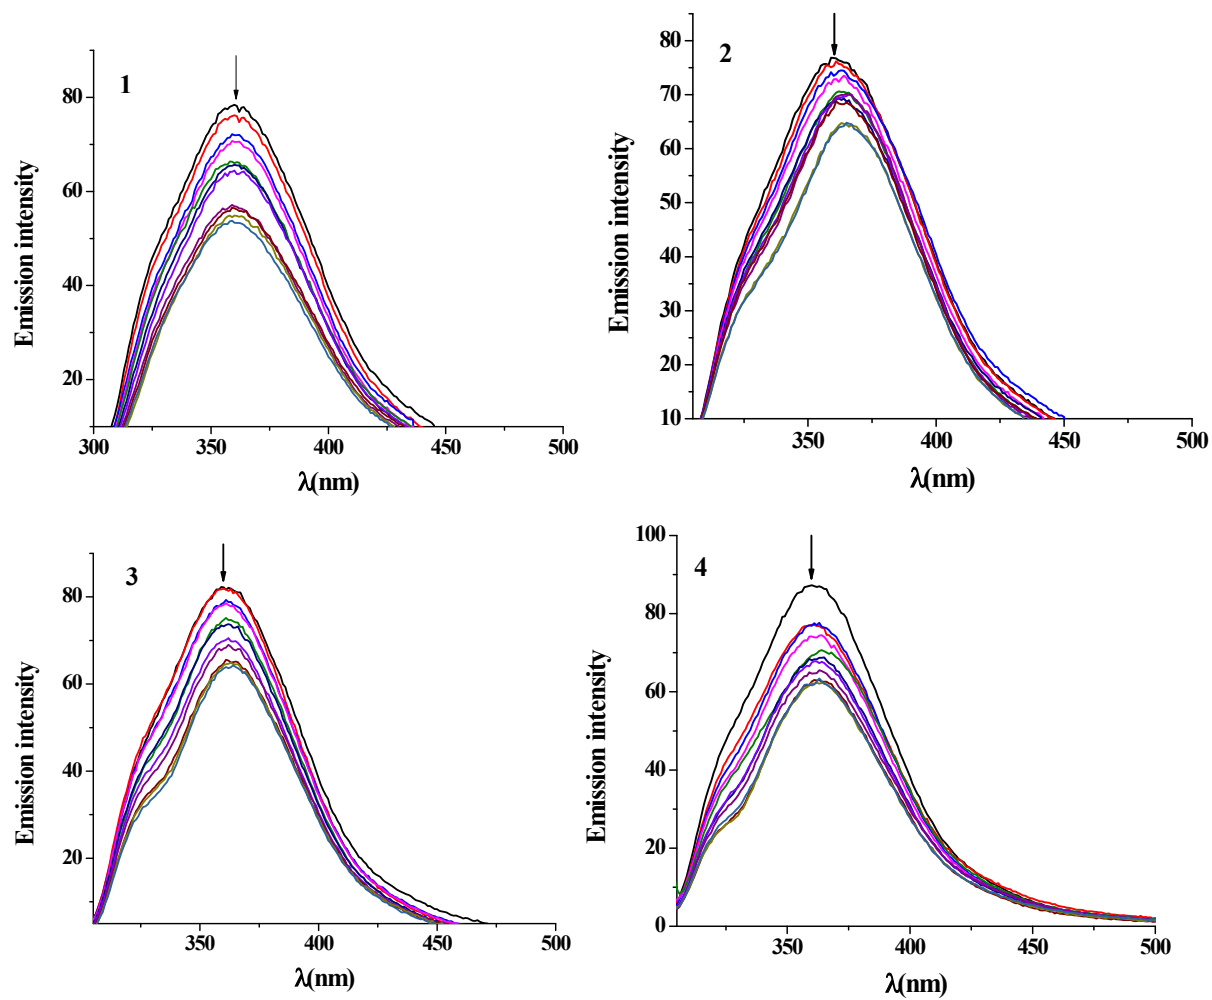

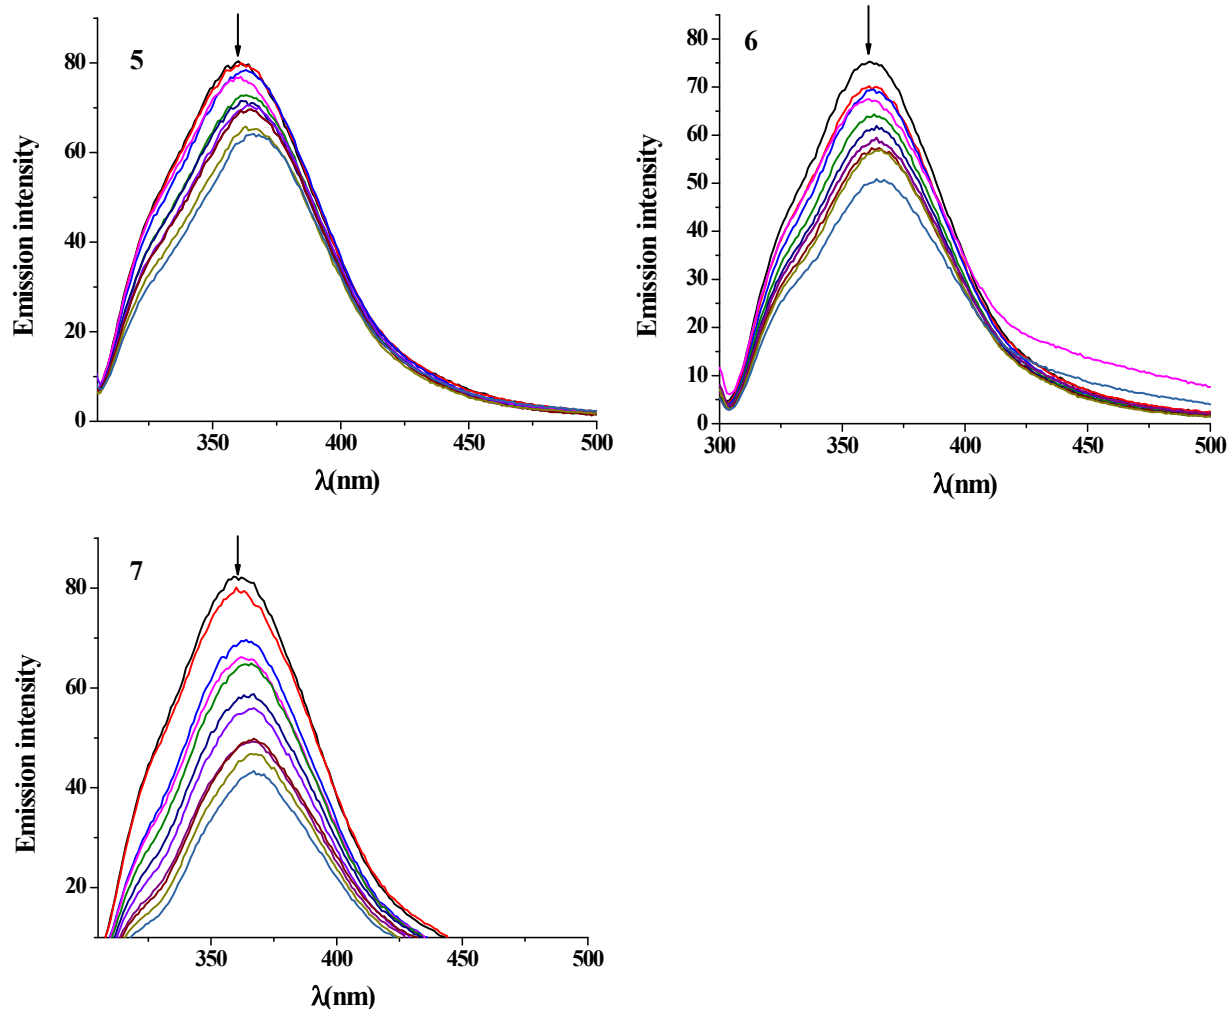

**Fig. S30.** Emission spectra of HSA in the presence of complexes 1–7. [HSA] = 2  $\mu$ M, [Ru] = 0–20  $\mu$ M;  $\lambda_{\text{ex}}$  = 295 nm. Arrow shows the changes in intensity upon increasing the concentration of complexes.

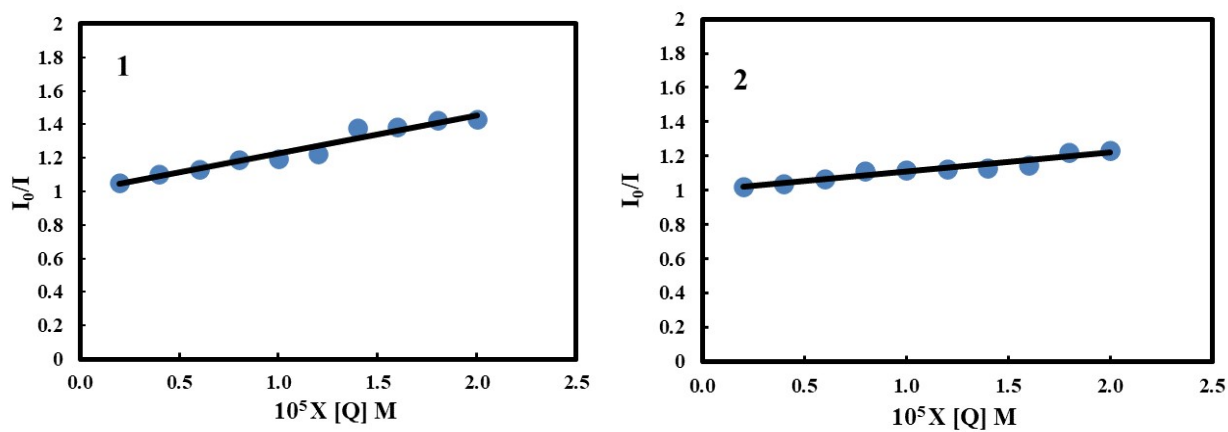

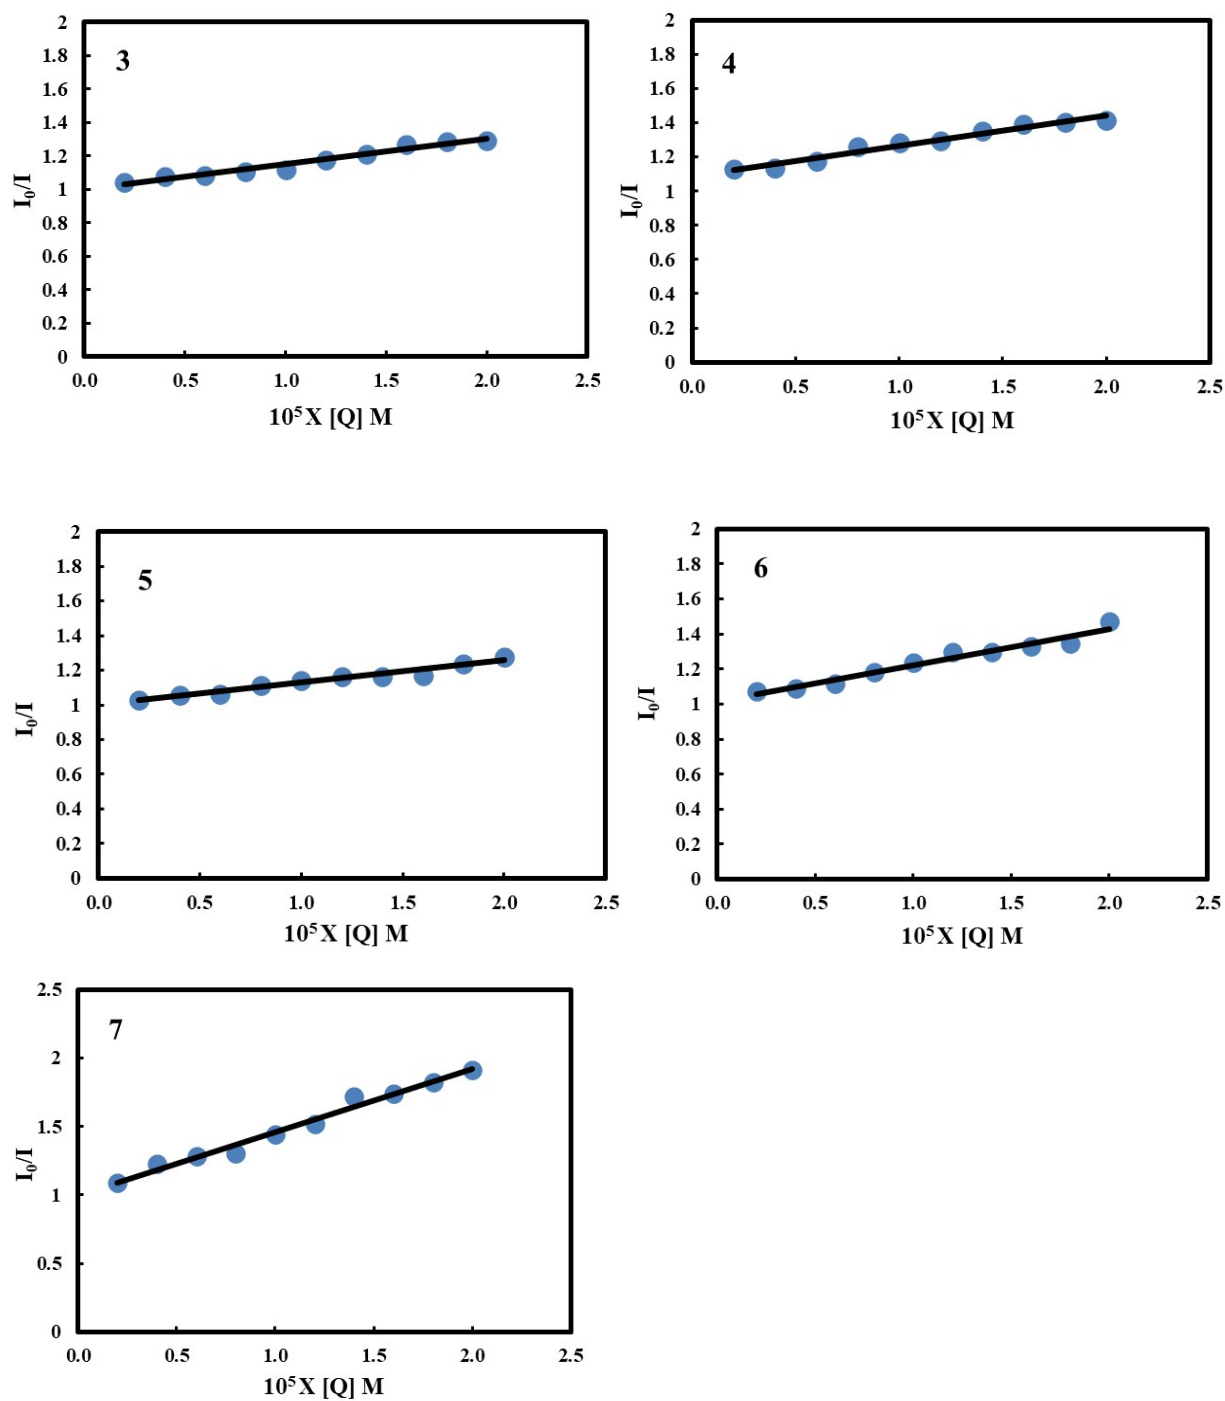

**Fig. S31.** Stern-Volmer quenching plots of HSA for complexes 1–7.

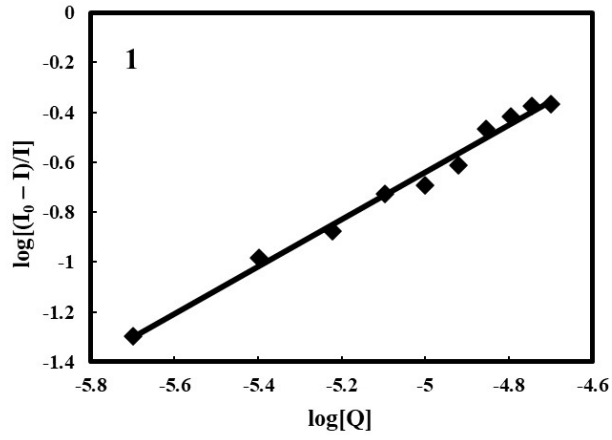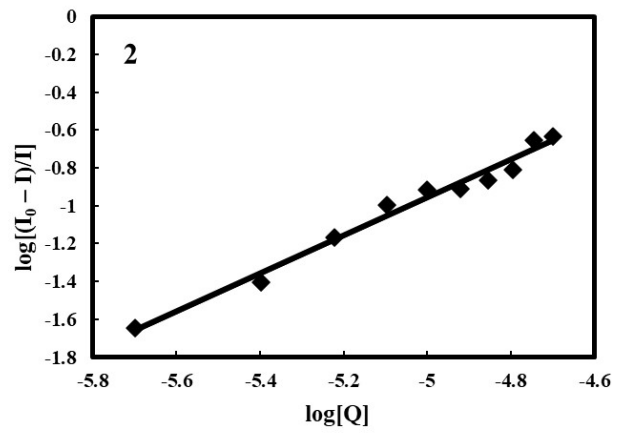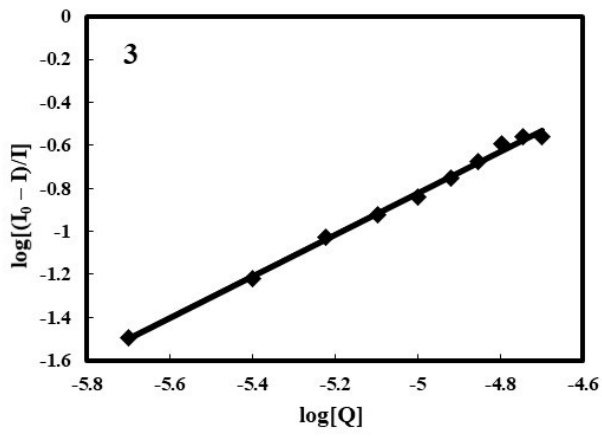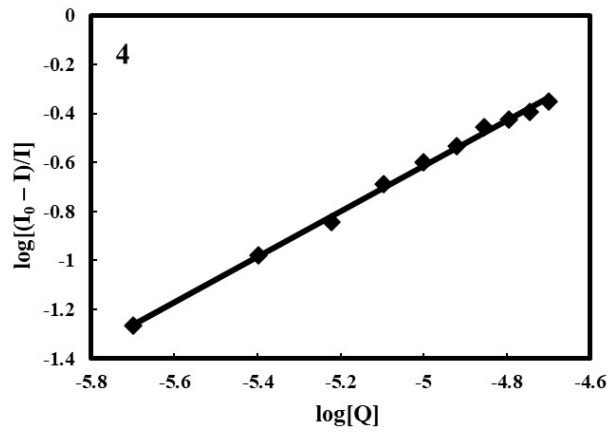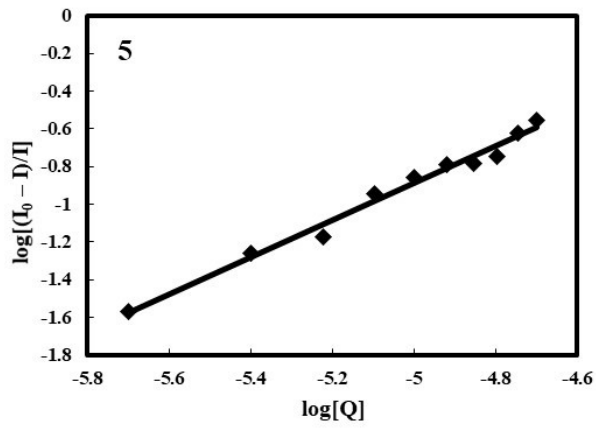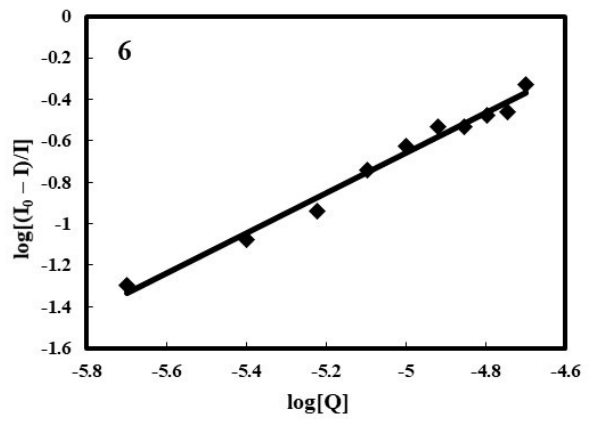



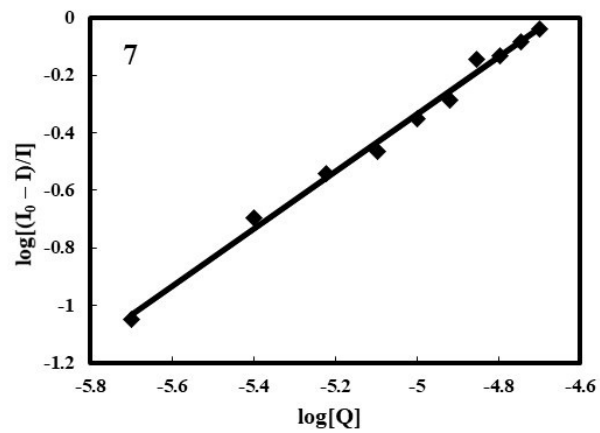

Fig. S32. Dependency of  $\log [(I_0-I)/I]$  vs.  $\log [Q]$  for the interactions of 1–7 with HSA.

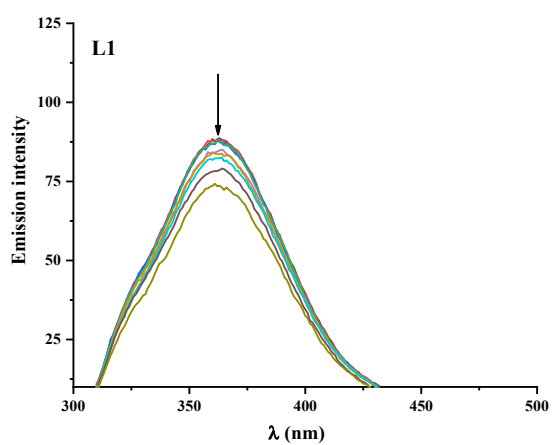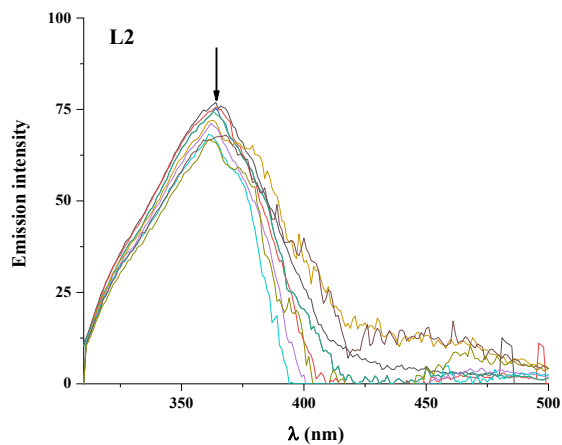

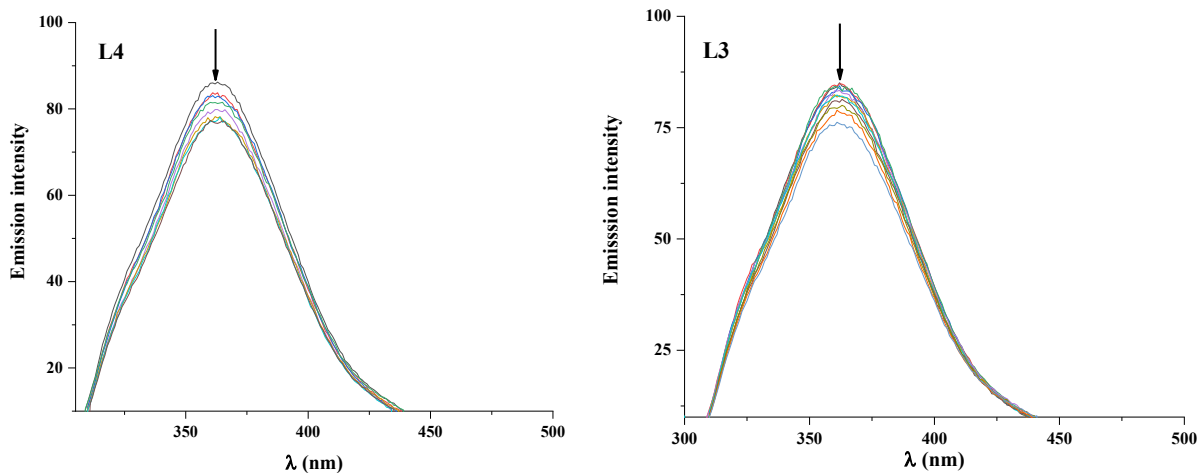

**Fig. S33.** Emission spectra of HSA in the presence of ligands **L1** – **L4**. [HSA] = 2  $\mu$ M, [L] = 0–20  $\mu$ M;  $\lambda_{\text{ex}}$  = 295 nm. Arrow shows the changes in intensity upon increasing the concentration of ligands.

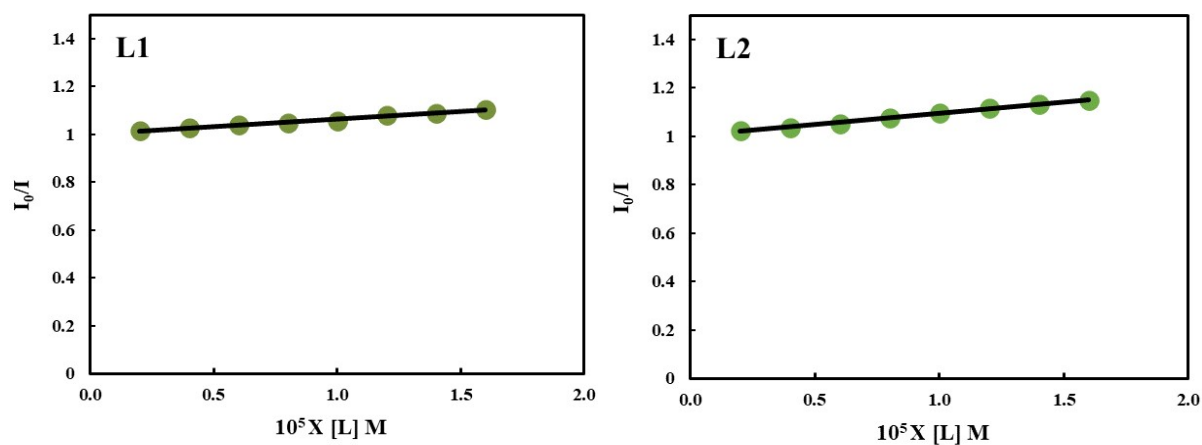

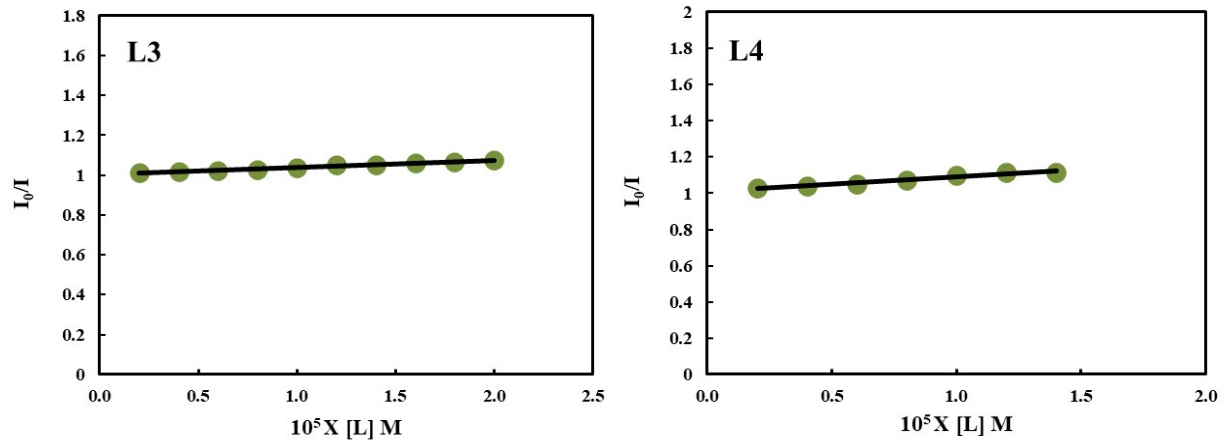

**Fig. S34.** Stern-Volmer quenching plots of HSA for ligands L1 – L4.

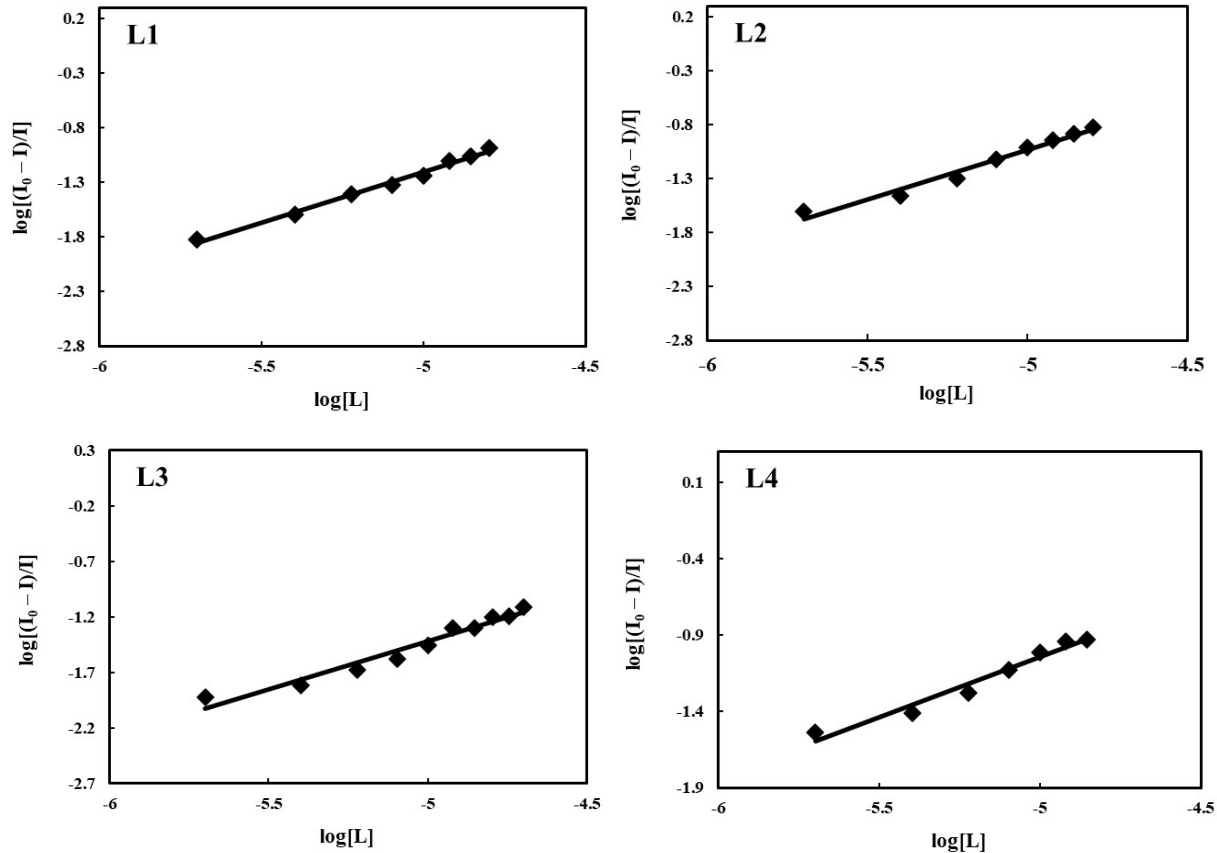

**Fig. S35.** Dependency of  $\log [(I_0-I)/I]$  vs.  $\log [L]$  for the interactions of **L1 – L4** with HSA.

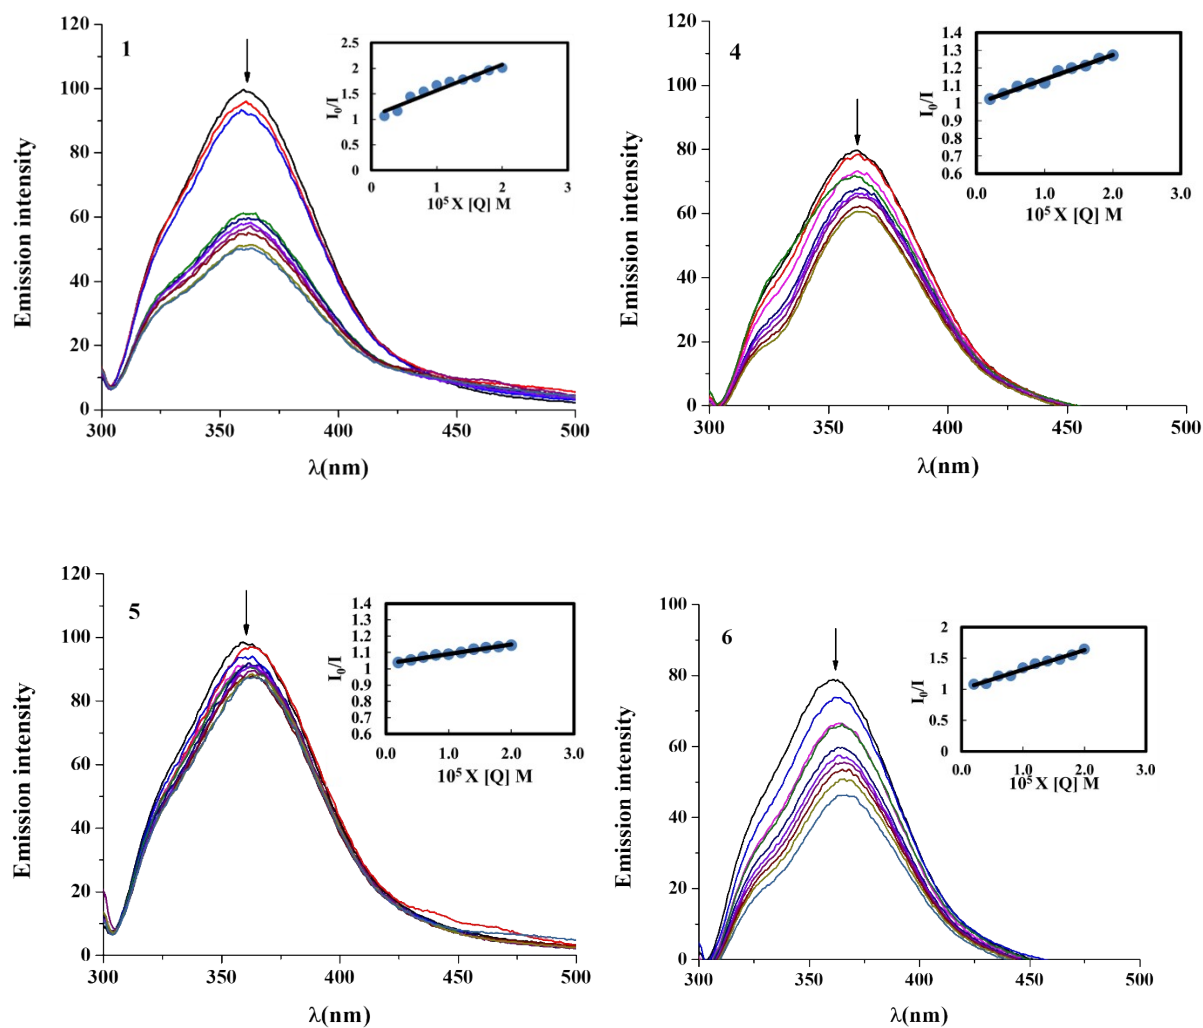

**Fig. S36.** Emission spectra of HSA-Ibuprofen in the presence of complexes **1, 4, 5** and **6**.  $[\text{HSA}] = 2 \mu\text{M}$   $[\text{Ibuprofen}] = 2 \mu\text{M}$ ,  $[\text{Ru}] = 0\text{--}20 \mu\text{M}$ ;  $\lambda_{\text{ex}} = 295 \text{ nm}$ . Arrow shows the changes in the fluorescence intensity upon increasing the concentration of complexes. Insert graph: Stern-Volmer quenching plot of HSA-Ibuprofen for complexes **1–7**.

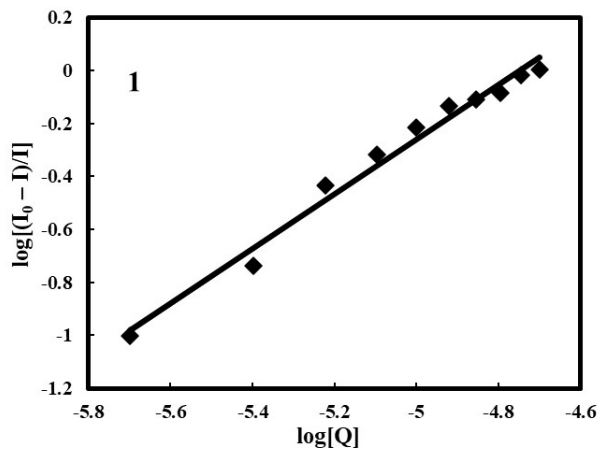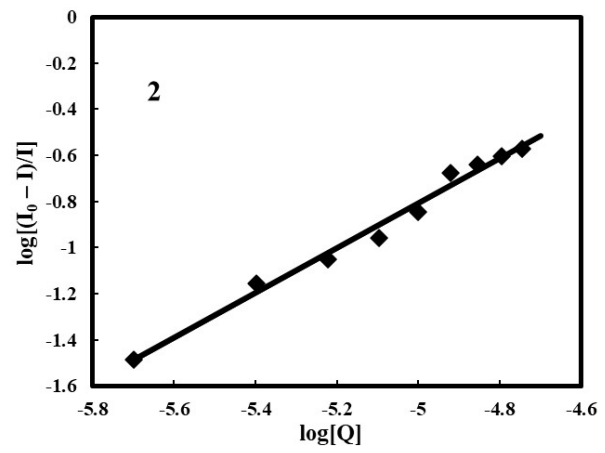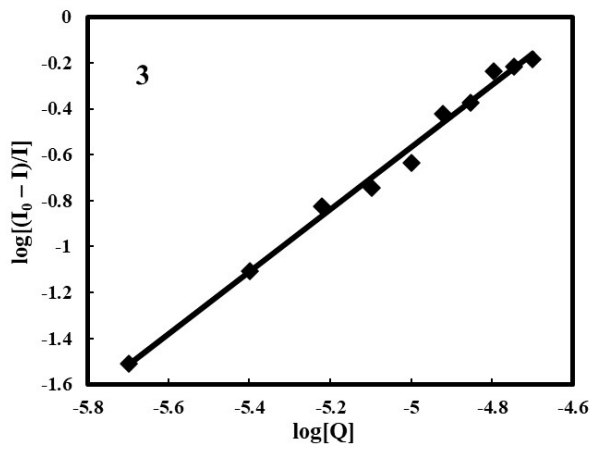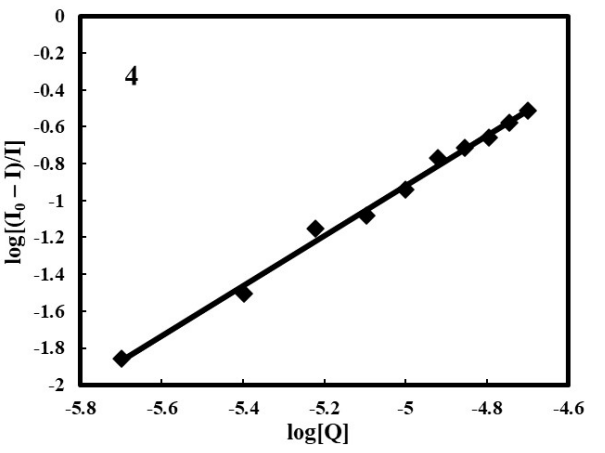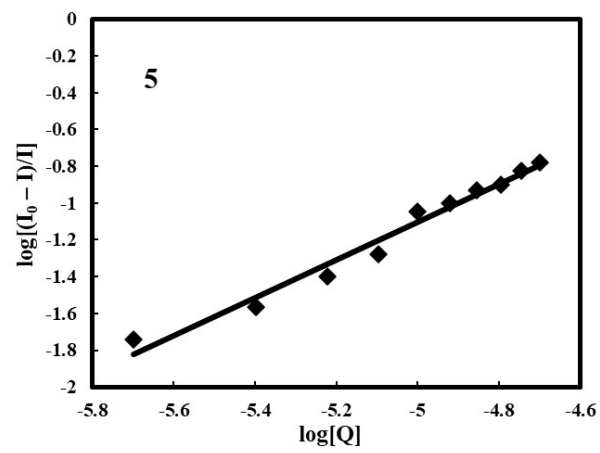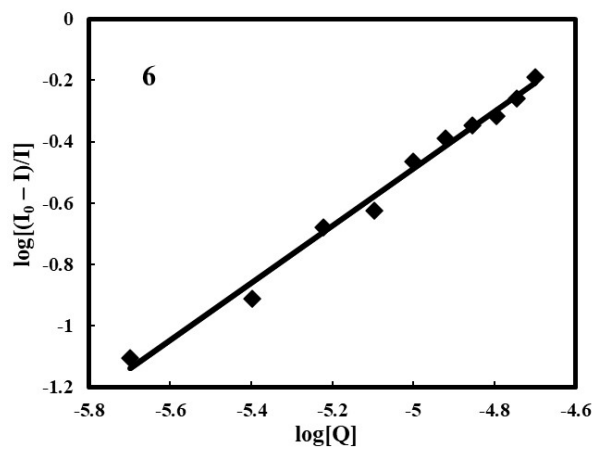

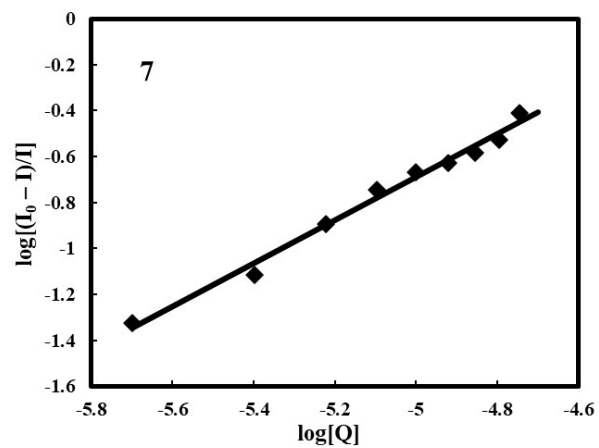

Fig. S37. Dependency of  $\log [(I_0-I)/I]$  vs.  $\log [Q]$  for the interactions of 1–7 with HSA-Ibuprofen

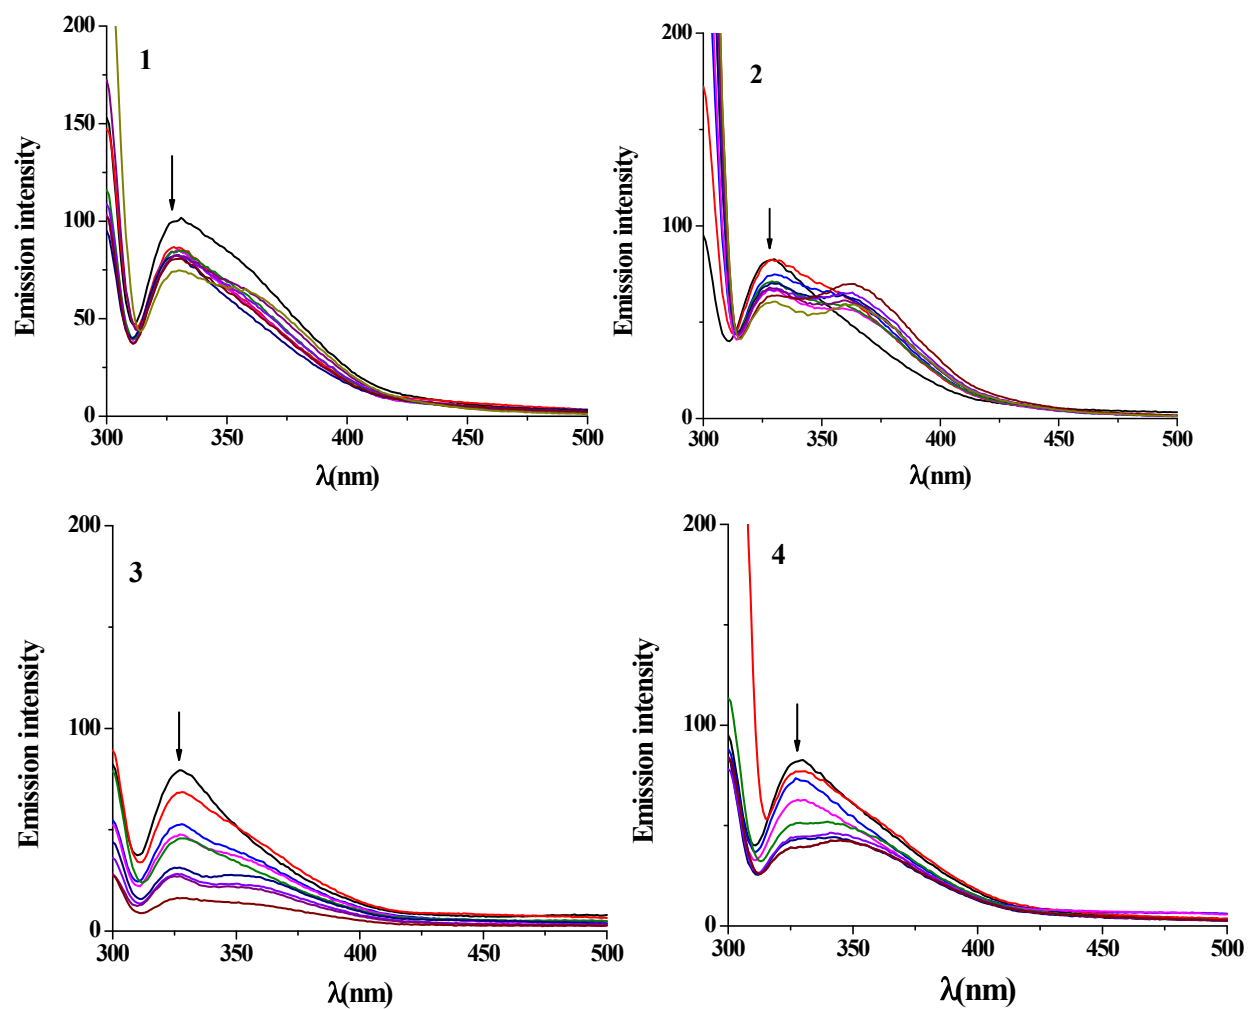

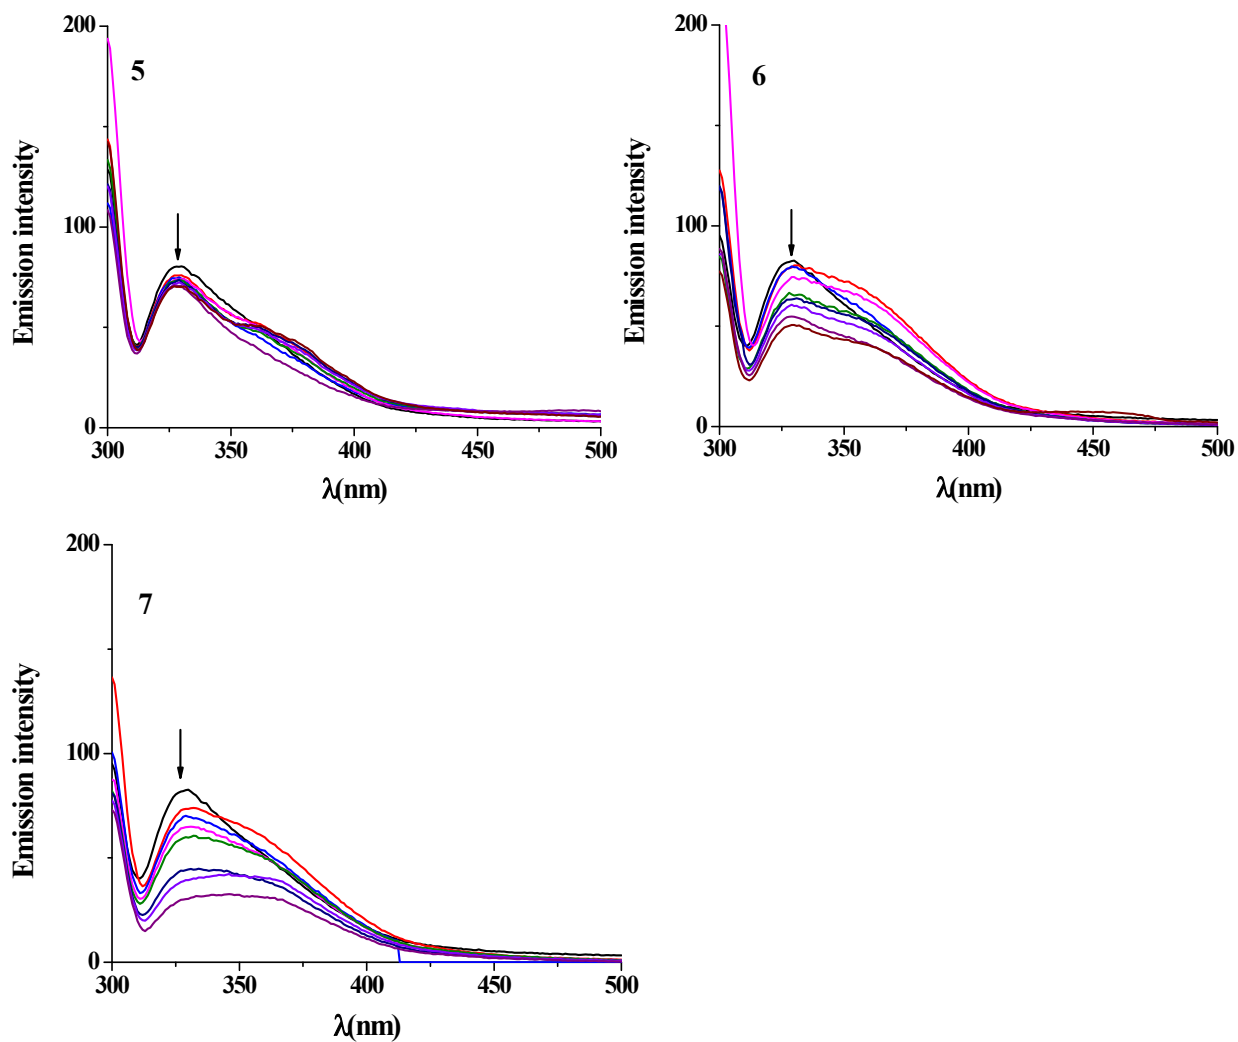

**Fig. S38.** Emission spectra of HSA-Eozin Y in the presence of complexes **1–7**. [HSA] = 2 Mm, [Eozin Y] = 2  $\mu$ M, [Ru] = 0–20  $\mu$ M;  $\lambda_{\text{ex}}$  = 295 nm. Arrow shows the changes in intensity upon increasing the concentration of complexes.

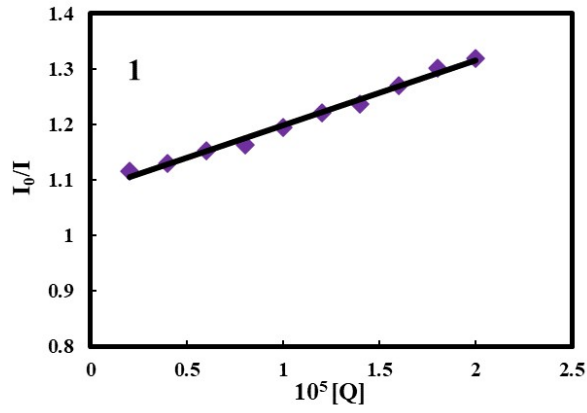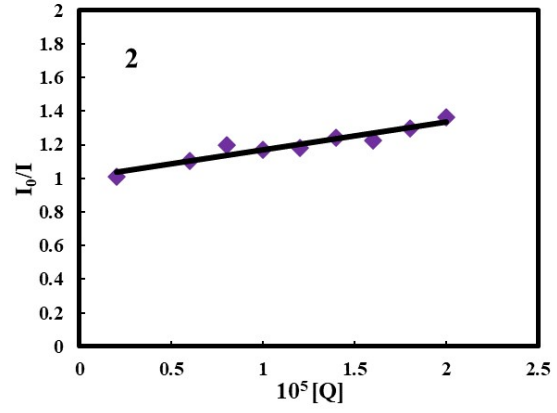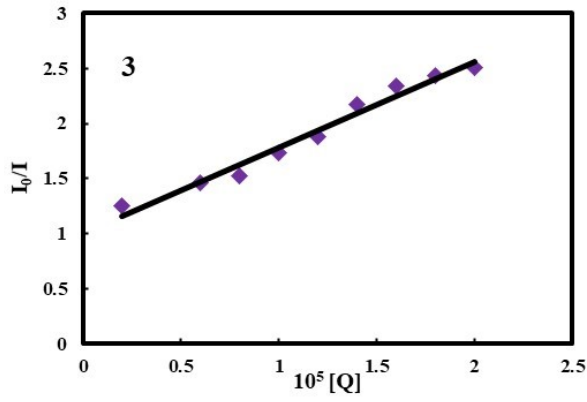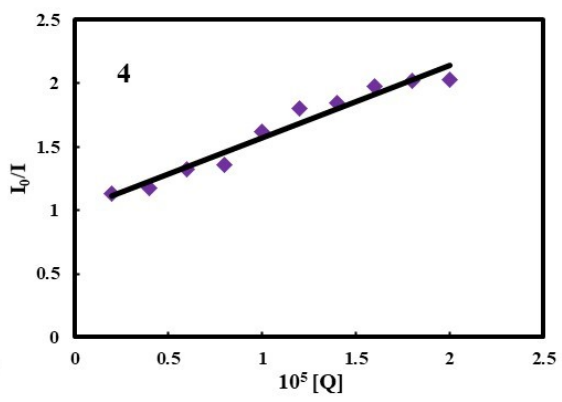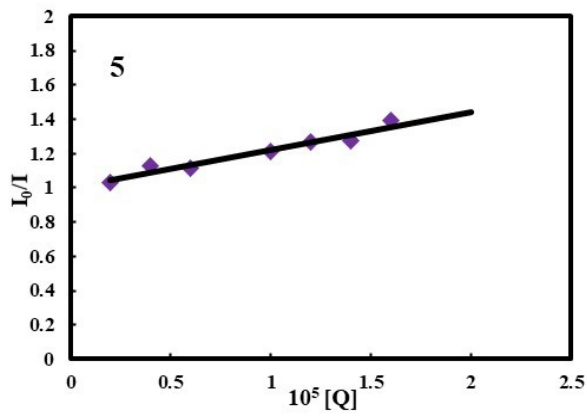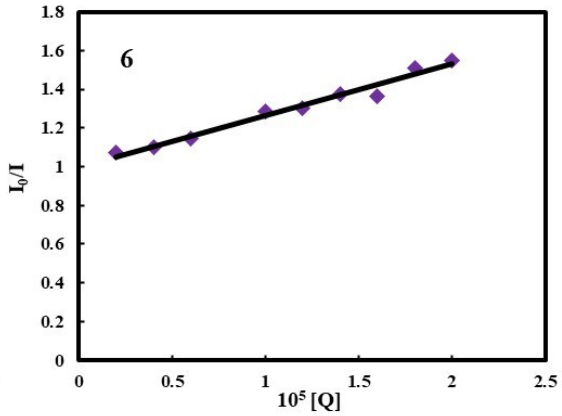



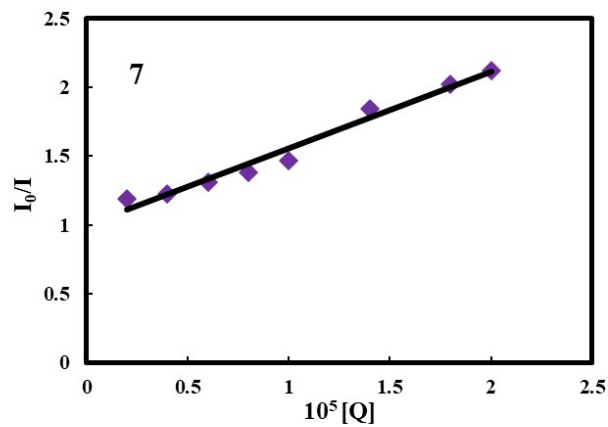

**Fig. S39.** Stern-Volmer quenching plot of HSA-Eozin Y for complexes 1–7.

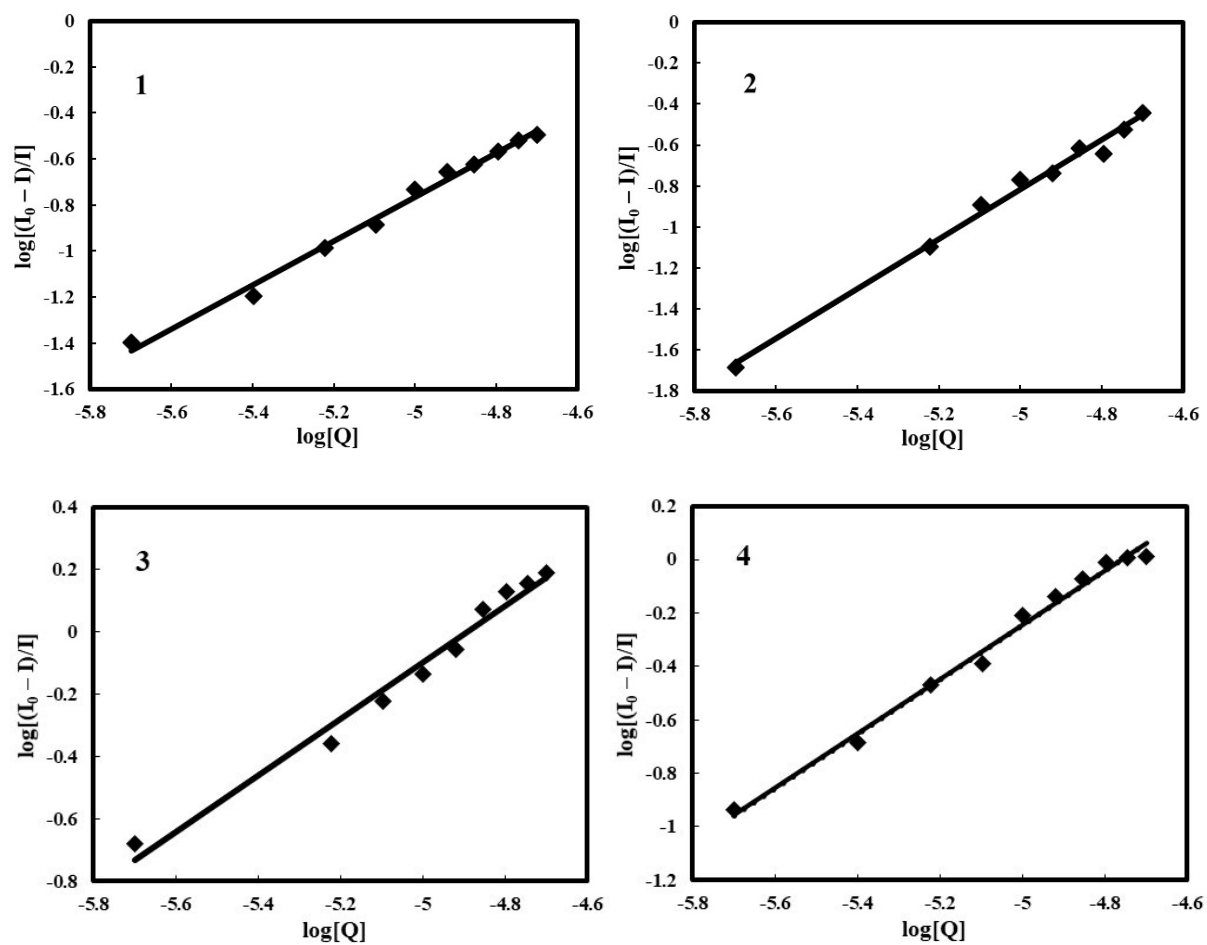

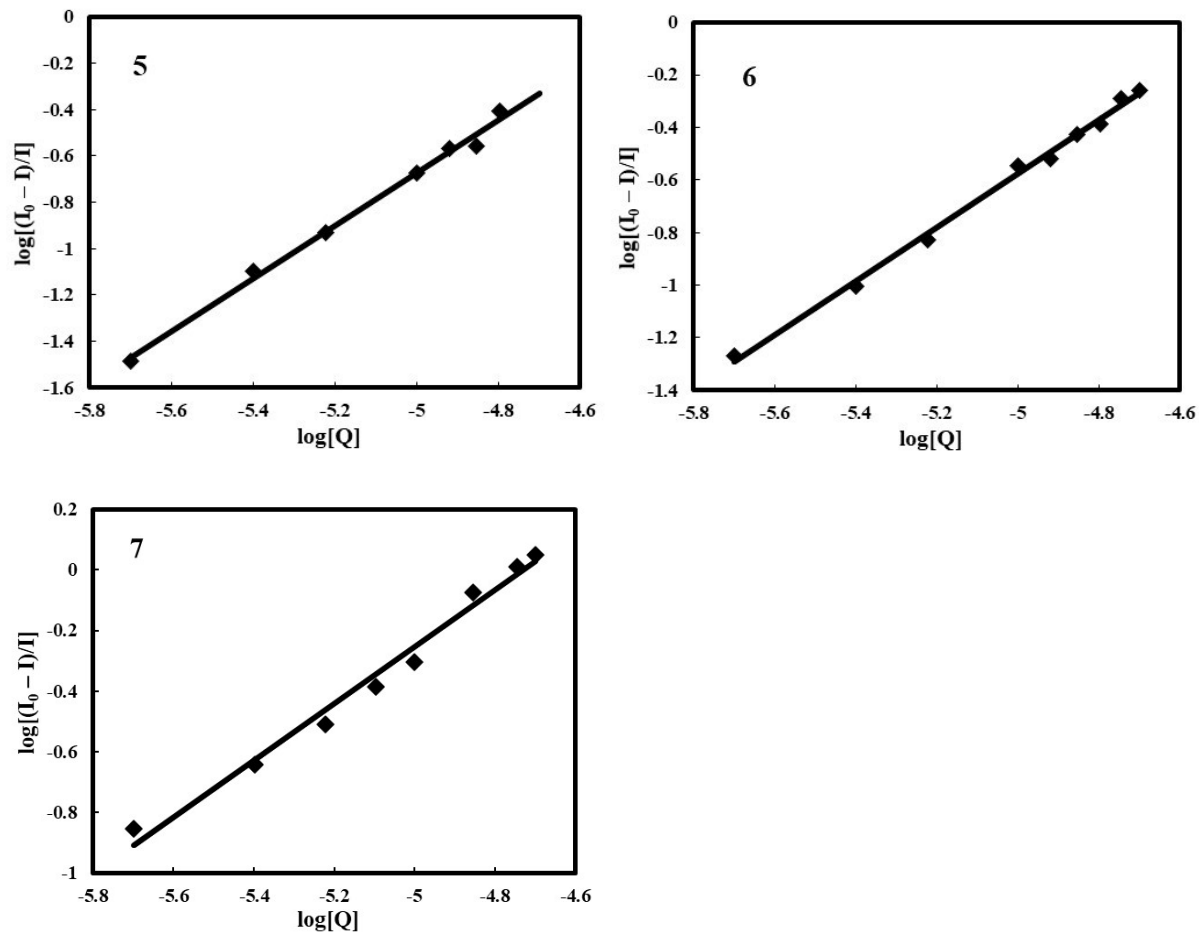

**Fig. S40.** Dependency of  $\log [(I_0-I)/I]$  vs.  $\log [Q]$  for the interactions of 1–7 with HSA-Eozin Y.

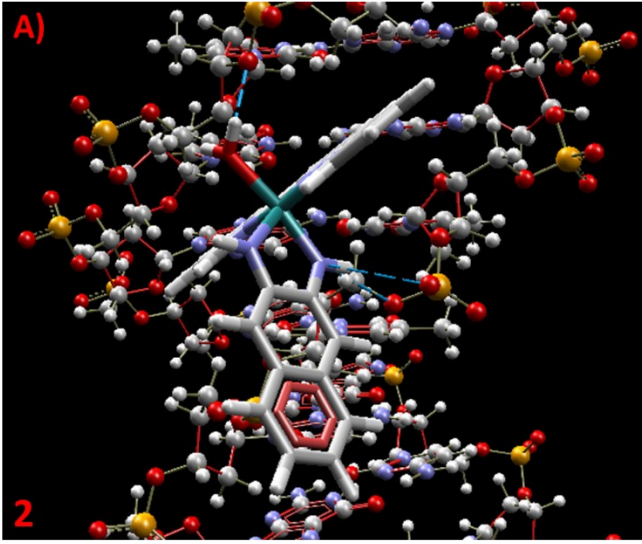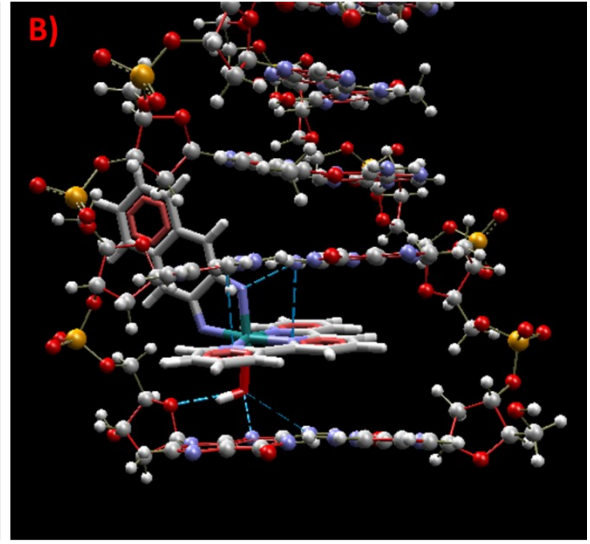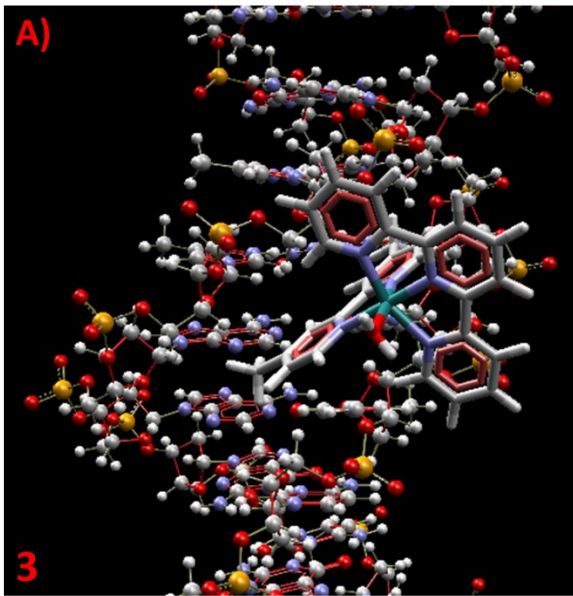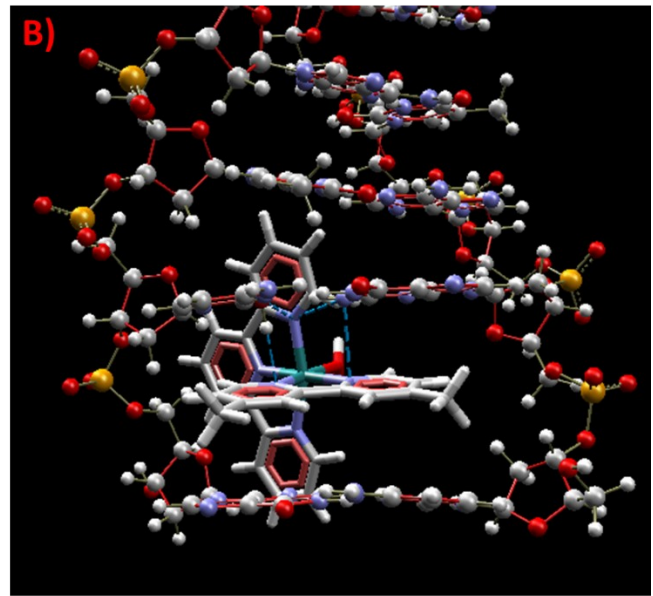

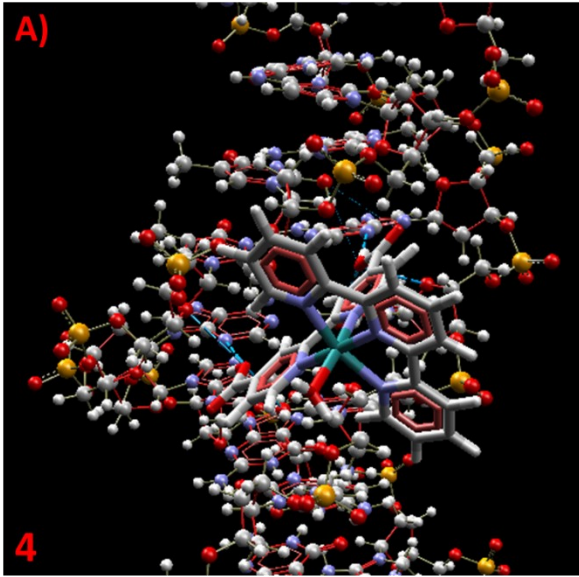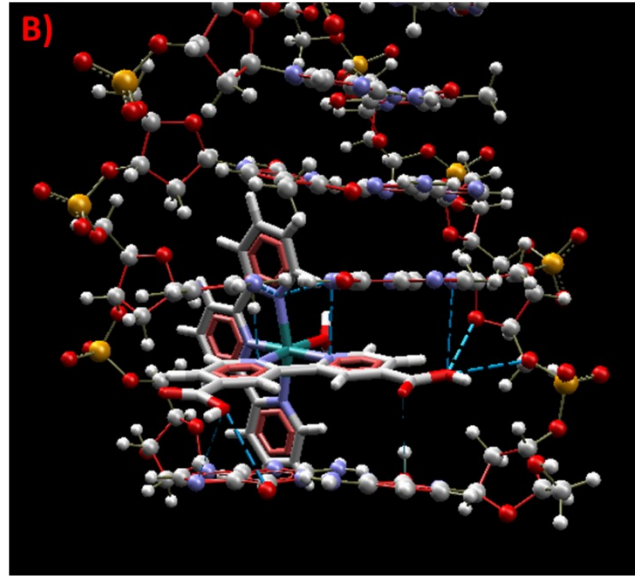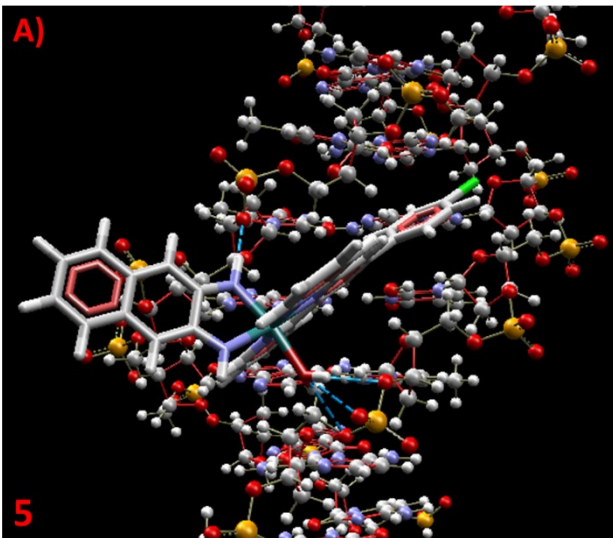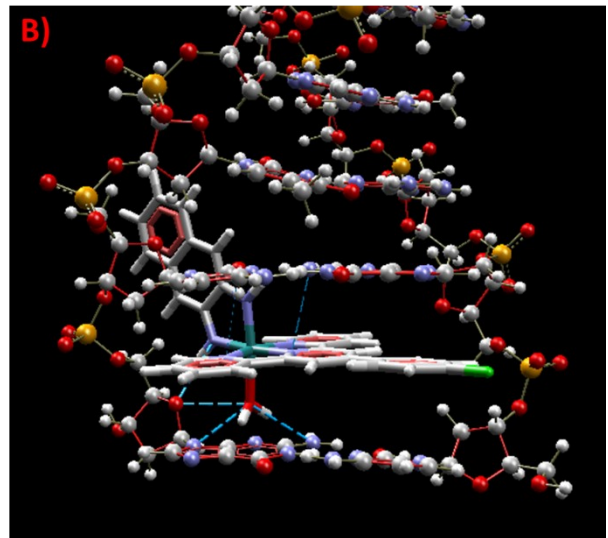

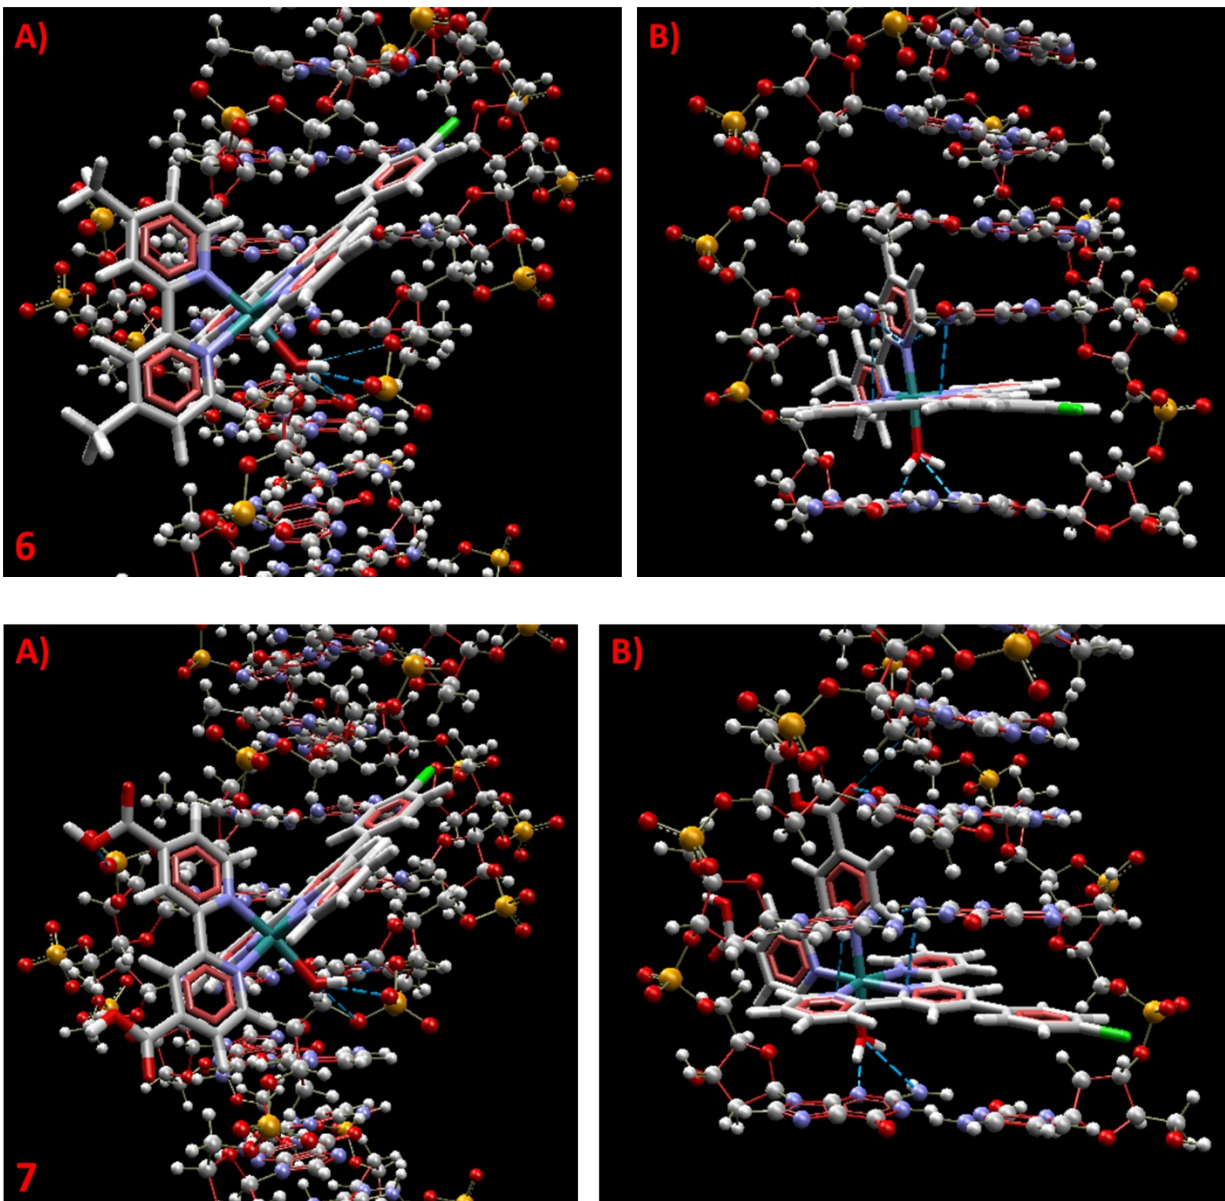

**Fig. S41.** Computational docking model illustrating interactions between complexes 2, 3, 4, 5, 6, 7 and DNA with the A) minor groove and B) intercalation gap. Hydrogen bonds are shown in blue dotted lines.

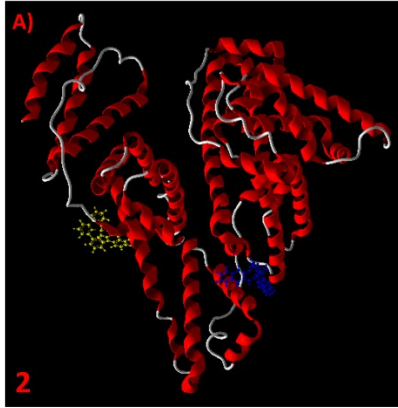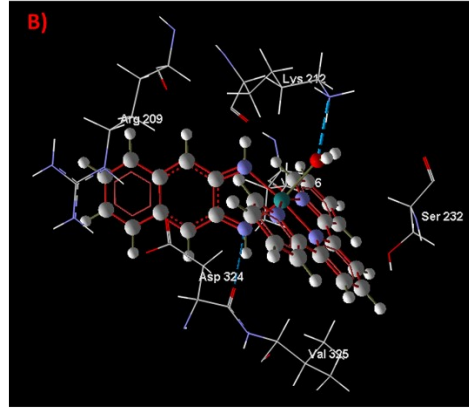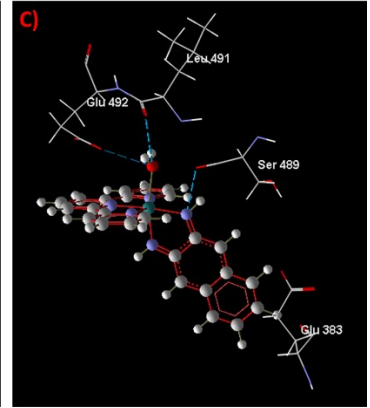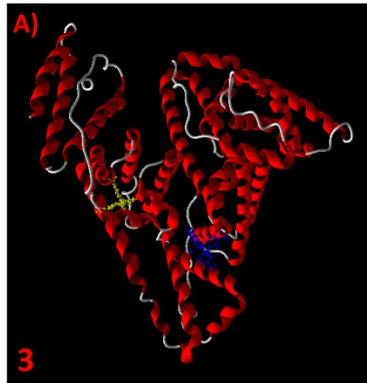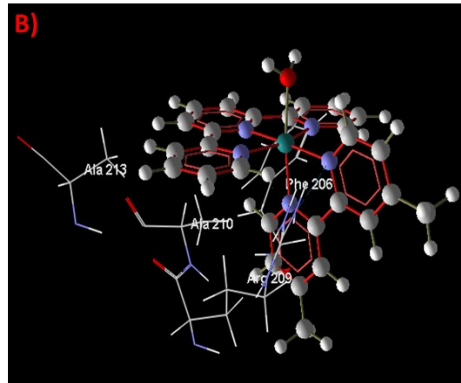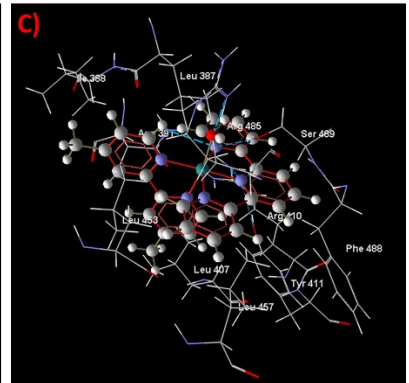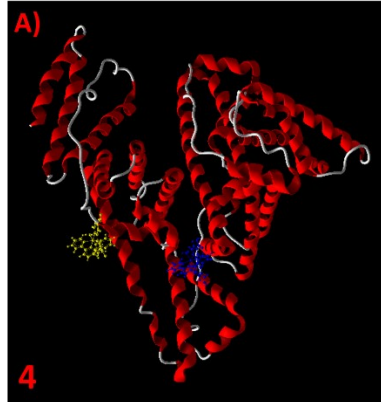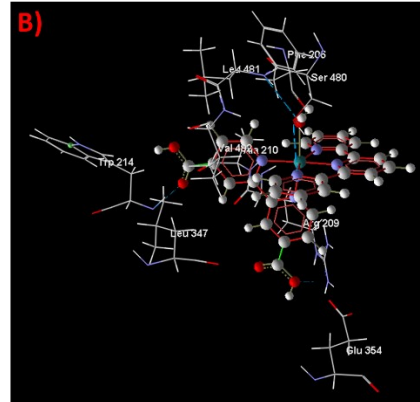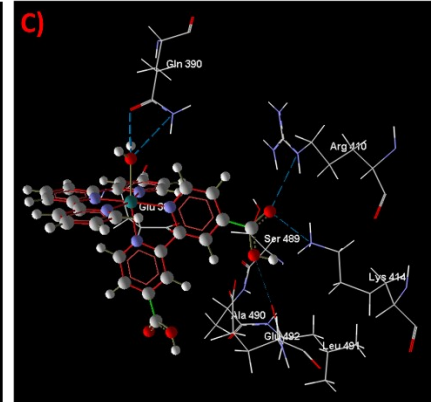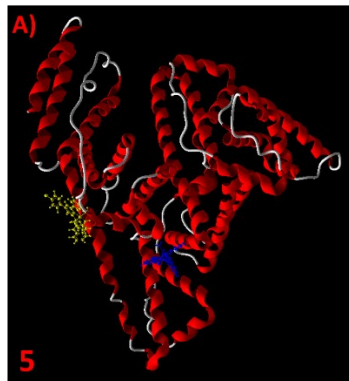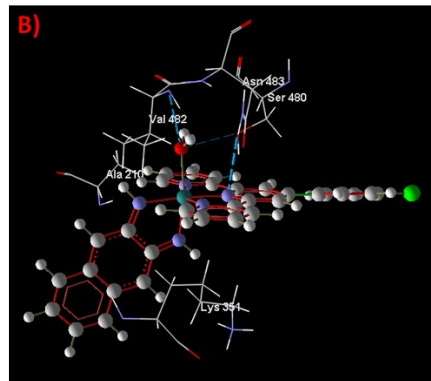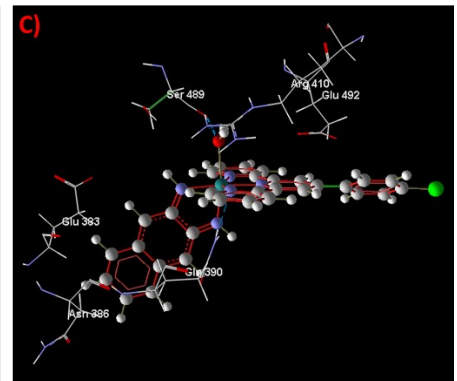

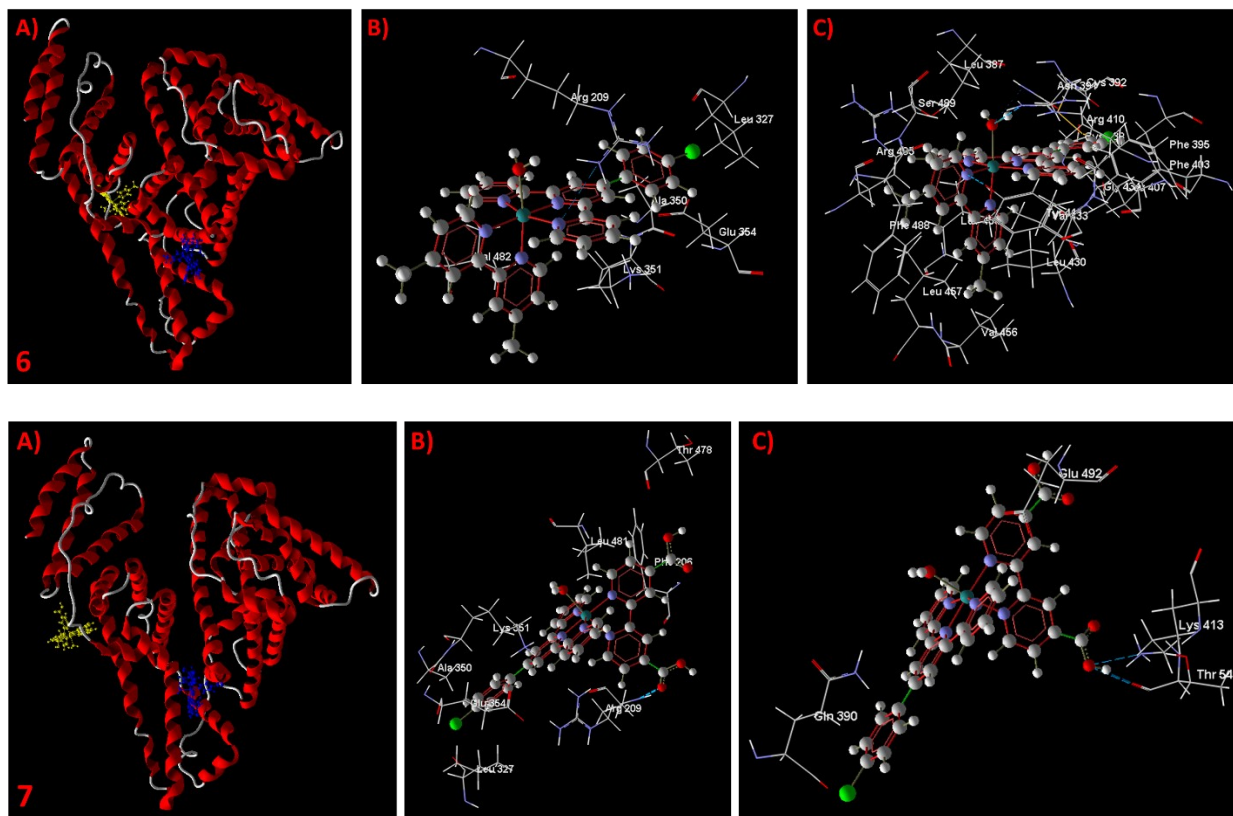

**Fig. S42.** A) Molecular docking of HSA with docking poses of complexes 2, 3, 4, 5, 6 and 7 illustrated on protein's backbone (blue binding into the binding site I and yellow binding into the binding site II), binding site of investigated complexes on HSA protein and selected amino acid residues represented by stick models B) binding into site I and C) site II. Hydrogen bonds are shown in blue dotted lines.

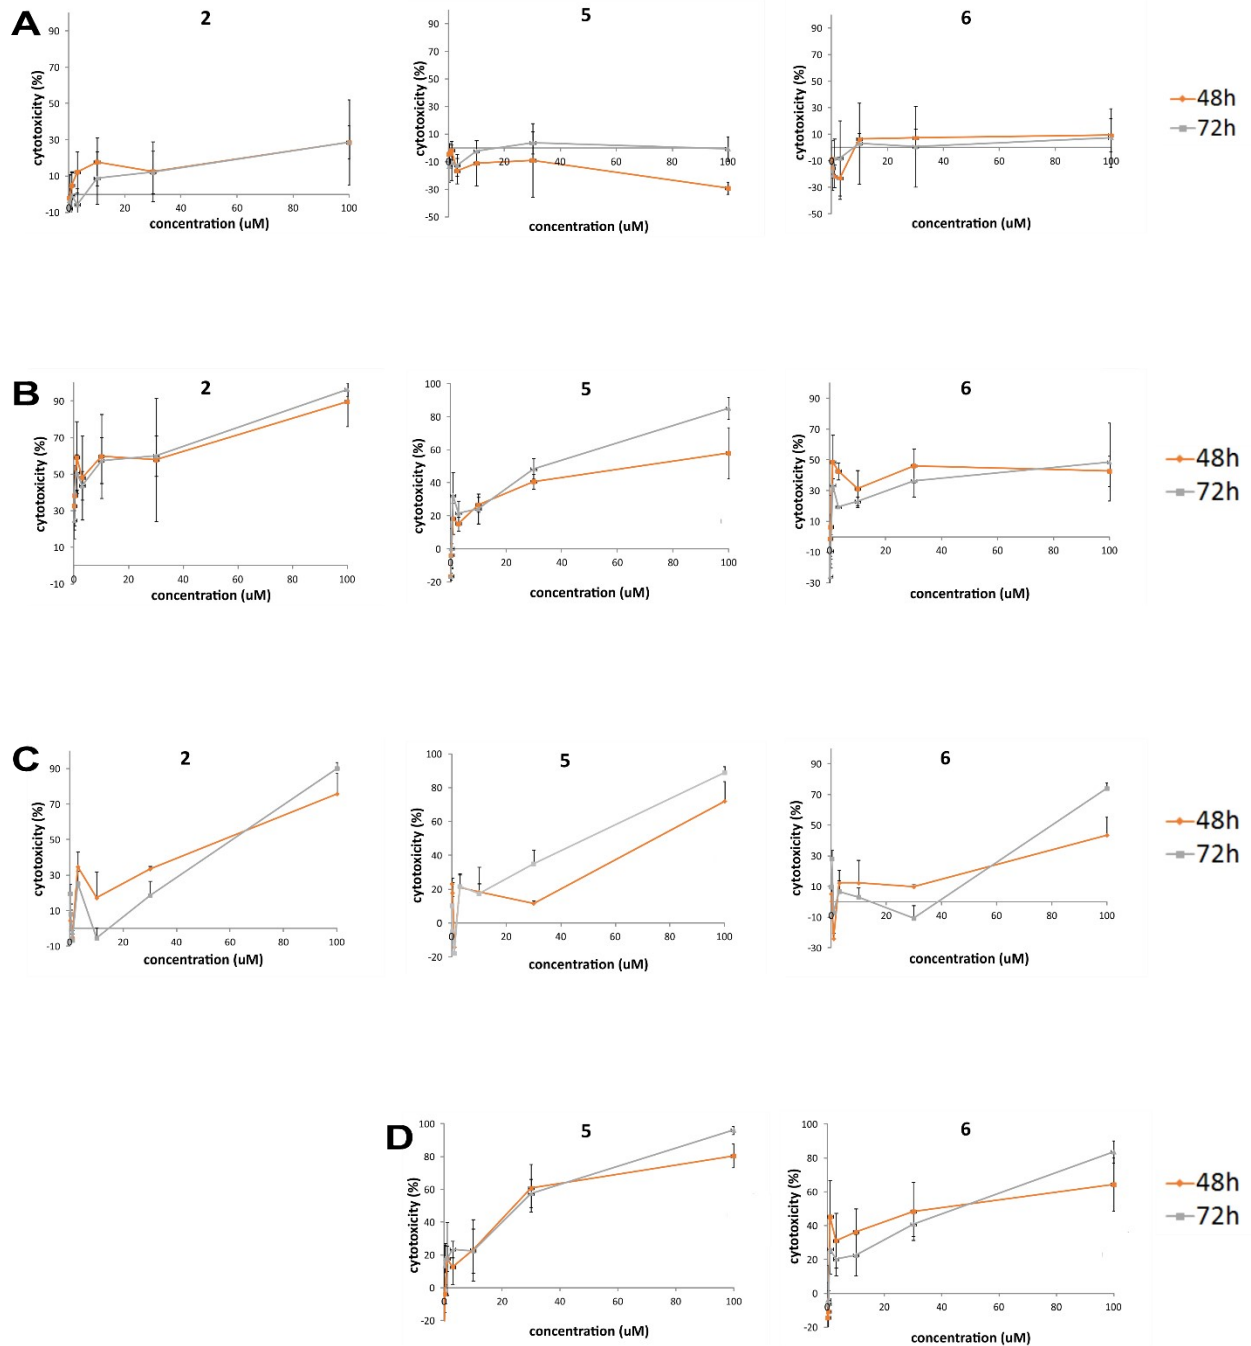

**Fig. 43.** Dose-response curves of cytotoxic effect of various concentrations of complexes **2**, **5**, and **6** against MRC-5 (A), MDA-MB 231 (B), HCT116 (C), and HeLa cells (D) after 48 h and 72 h treatment. The results are presented as mean  $\pm$  SD of three separate experiments.



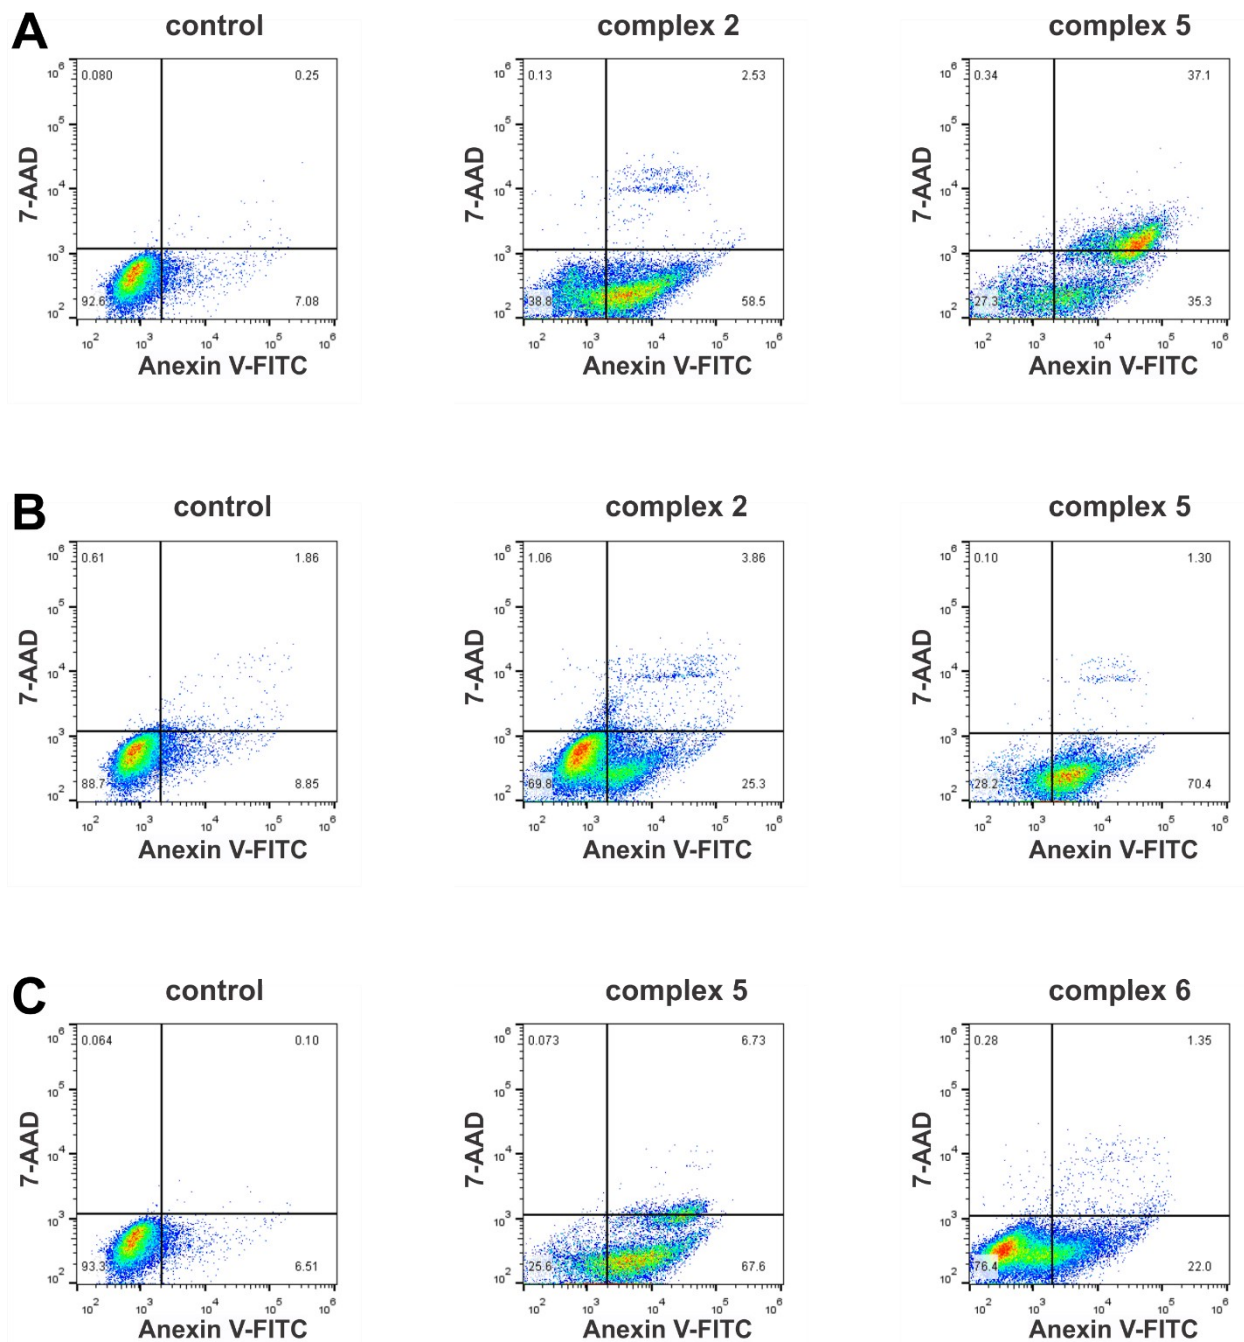

**Fig. S44.** Representative dot plots presenting percentages of viable (Annexin V-7-AAD<sup>-</sup>), early apoptotic (Annexin V+7-AAD<sup>-</sup>), late apoptotic (Annexin V+7-AAD<sup>+</sup>) and necrotic cells (Annexin V-7-AAD<sup>+</sup>) in MDA-MB 231 (A), HCT116 (B), and HeLa cells (C) treated with complexes 2, 5, and 6.

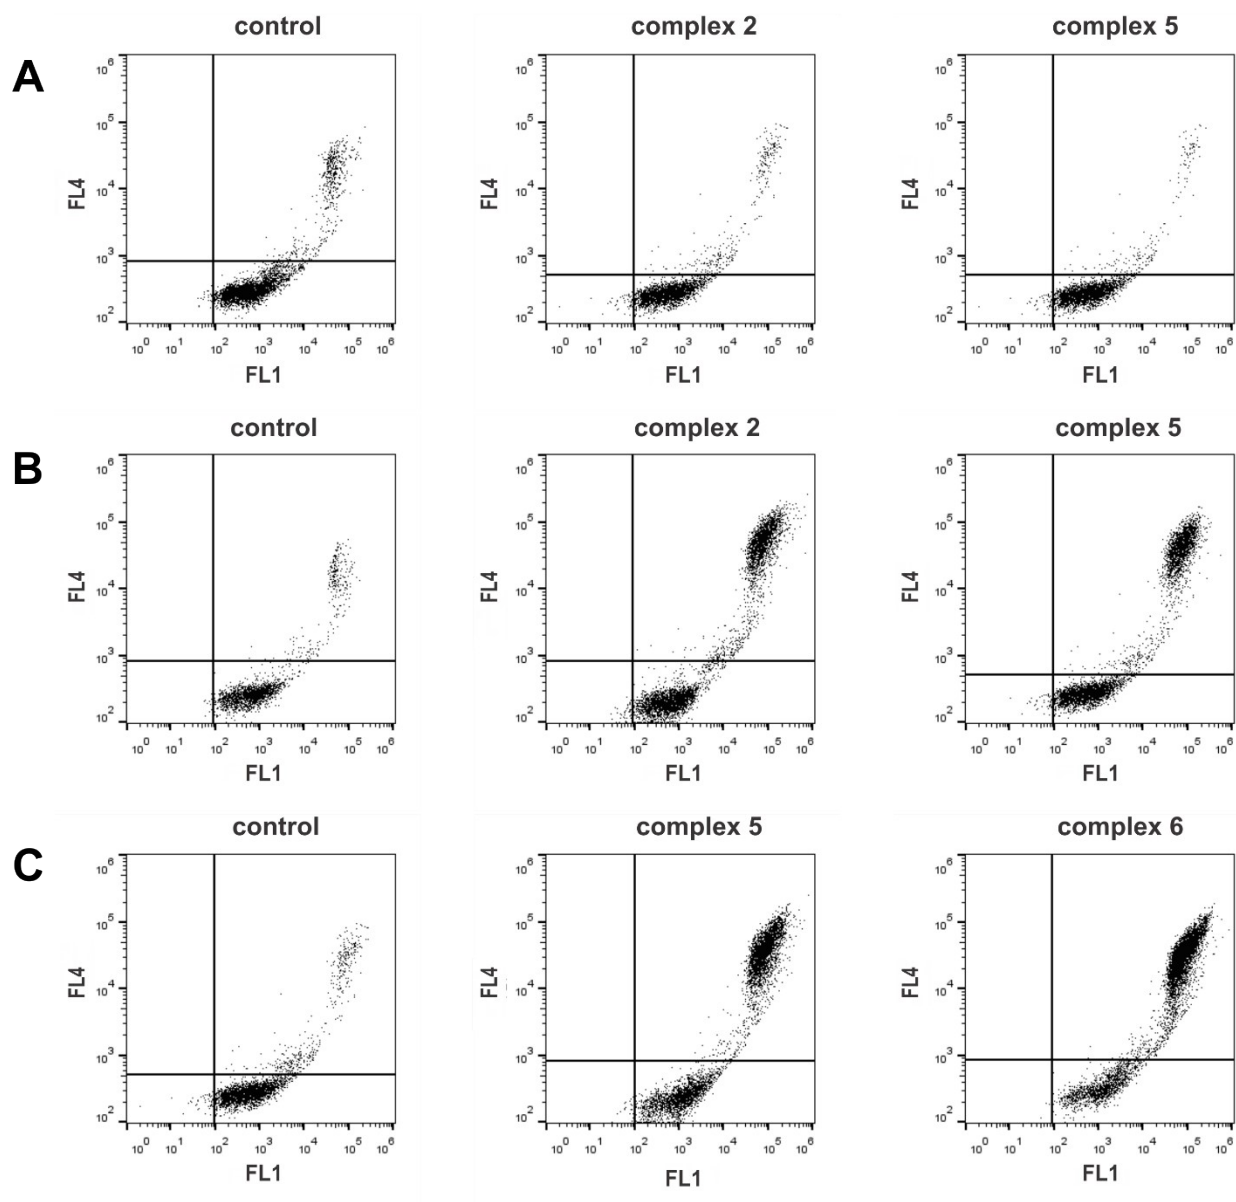

**Fig. S45.** Representative dot plots presenting acridin orange stained MDA-MB 231 (A), HCT116 (B), and HeLa cells (C) treated with complexes 2, 5, and 6.

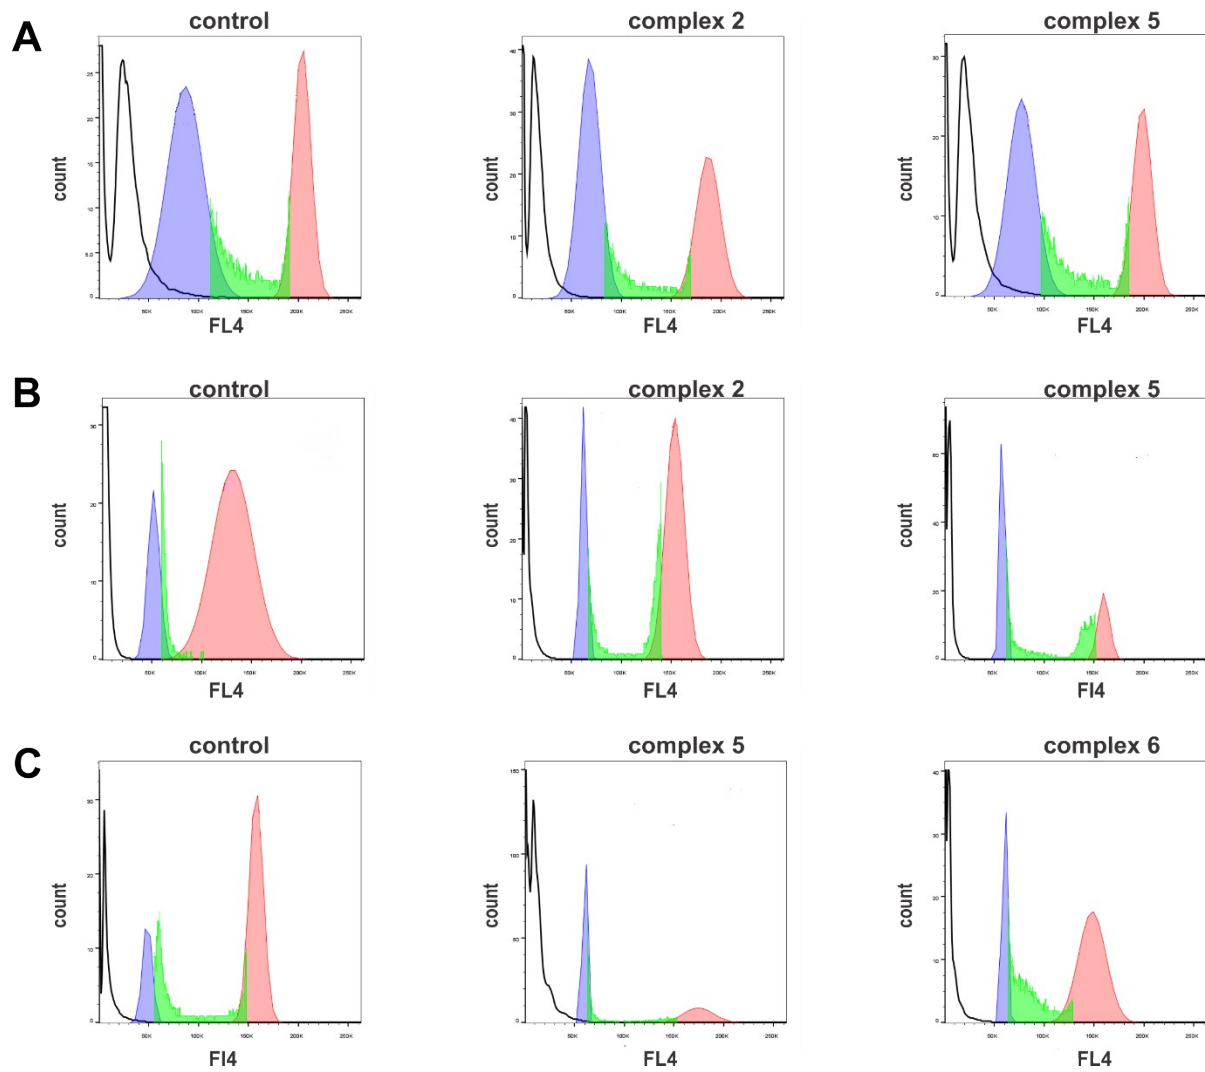

**Fig. S46.** Representative histograms presenting cell cycle distribution in MDA-MB 231 (A), HCT116 (B), and HeLa cells (C) in untreated (control) and cells treated with complexes 2, 5, and 6.

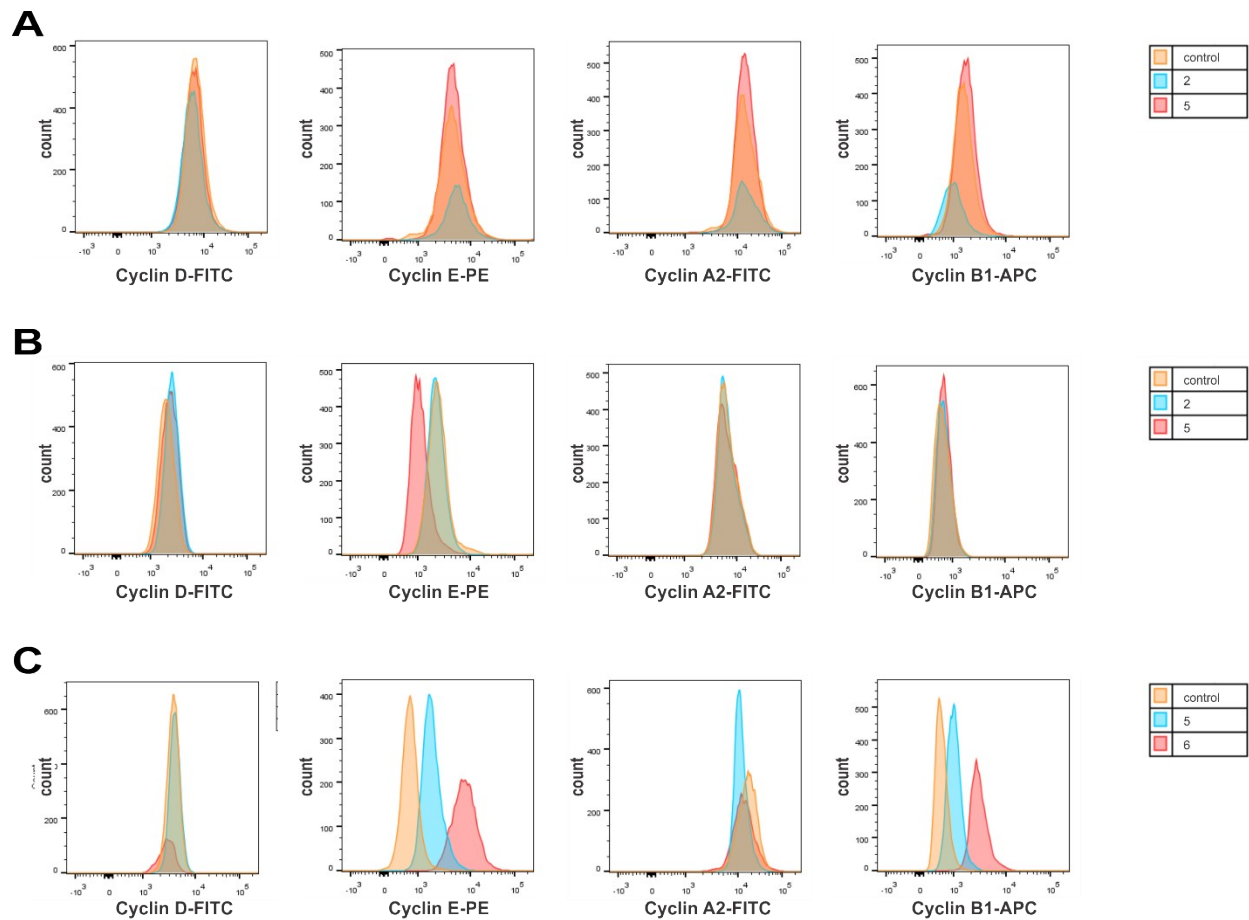

**Fig. S47.** Overlaid histograms presenting the expression of cyclins D, E, A2, and B1 in untreated and treated MDA-MB 231 (A), HCT116 (B), and HeLa (C) cells.

**Table S1.** Observed *pseudo*-first order rate constants as a function of complex concentration and temperature for the reaction of complex **1** with 5'-GMP (**L**) in water.

| $\lambda_{\text{max}}$ (nm) | t (°C) | $C_L$ [ $10^{-3}$ M] | $k_{\text{obsd}}$ [ $10^{-4}$ s $^{-1}$ ] |
|-----------------------------|--------|----------------------|-------------------------------------------|
| 506                         | 15.0   | 5.00                 | 3.62(2)                                   |
|                             |        | 4.00                 | 2.75(3)                                   |
|                             |        | 3.00                 | 2.13(2)                                   |
|                             |        | 2.00                 | 1.62(3)                                   |
|                             |        | 1.00                 | 0.66(3)                                   |
|                             | 25.0   | 5.00                 | 6.99(3)                                   |
|                             |        | 4.00                 | 6.19(2)                                   |
|                             |        | 3.00                 | 4.13(3)                                   |
|                             |        | 2.00                 | 2.85(3)                                   |
|                             |        | 1.00                 | 1.49(3)                                   |
|                             | 37.0   | 5.00                 | 20.80(3)                                  |
|                             |        | 4.00                 | 15.50(2)                                  |
|                             |        | 3.00                 | 11.21(3)                                  |
|                             |        | 2.00                 | 9.05(2)                                   |
|                             |        | 1.00                 | 4.10(2)                                   |

**Table S2.** Observed *pseudo*-first order rate constants as a function of complex concentration and temperature for the reaction of complex **1** with L-Cys (**L**) in water.

| $\lambda_{\text{max}}$ (nm) | t (°C) | $C_{\text{L}}$ [ $10^{-3}$ M] | $k_{\text{obsd}}$ [ $10^{-4}$ s $^{-1}$ ] |
|-----------------------------|--------|-------------------------------|-------------------------------------------|
| 522                         | 15.0   | 5.00                          | 0.70(3)                                   |
|                             |        | 4.00                          | 0.55(3)                                   |
|                             |        | 3.00                          | 0.38(3)                                   |
|                             |        | 2.00                          | 0.30(2)                                   |
|                             |        | 1.00                          | 0.14(3)                                   |
|                             | 25.0   | 5.00                          | 2.20(2)                                   |
|                             |        | 4.00                          | 1.70(2)                                   |
|                             |        | 3.00                          | 1.25(3)                                   |
|                             |        | 2.00                          | 0.77(3)                                   |
|                             |        | 1.00                          | 0.52(3)                                   |
|                             | 37.0   | 5.00                          | 3.80(3)                                   |
|                             |        | 4.00                          | 2.57(3)                                   |
|                             |        | 3.00                          | 1.79(2)                                   |
|                             |        | 2.00                          | 1.12(2)                                   |
|                             |        | 1.00                          | 0.85(2)                                   |

**Table S3.** Observed *pseudo*-first order rate constants as a function of complex concentration and temperature for the reaction of complex **1** with L-Met (**L**) in water.

| $\lambda_{\max}$ (nm) | t (°C) | $C_L$ [ $10^{-3}$ M] | $k_{\text{obsd}}$ [ $10^{-4}$ s $^{-1}$ ] |
|-----------------------|--------|----------------------|-------------------------------------------|
| 502                   | 15.0   | 5.00                 | 0.70(3)                                   |
|                       |        | 4.00                 | 0.52(3)                                   |
|                       |        | 3.00                 | 0.42(3)                                   |
|                       |        | 2.00                 | 0.30(2)                                   |
|                       |        | 1.00                 | 0.13(3)                                   |
|                       | 25.0   | 5.00                 | 1.84(3)                                   |
|                       |        | 4.00                 | 1.37(2)                                   |
|                       |        | 3.00                 | 0.97(3)                                   |
|                       |        | 2.00                 | 0.65(2)                                   |
|                       |        | 1.00                 | 0.47(3)                                   |
|                       | 37.0   | 5.00                 | 2.58(2)                                   |
|                       |        | 4.00                 | 2.19(3)                                   |
|                       |        | 3.00                 | 1.47(3)                                   |
|                       |        | 2.00                 | 1.03(3)                                   |
|                       |        | 1.00                 | 0.60(2)                                   |

**Table S4.** Observed *pseudo*-first order rate constants as a function of complex concentration for the reaction of complex **2** with 5'-GMP, L-Cys and L-Met (**L**) in water.

| Ligand | $\lambda_{\max}$ (nm) | $C_L$ [ $10^{-3}$ M] | $k_{\text{obsd}}$ [ $10^{-4}$ s $^{-1}$ ] |
|--------|-----------------------|----------------------|-------------------------------------------|
| 5'-GMP | 528                   | 5.0                  | 2.59(3)                                   |
|        |                       | 4.0                  | 1.97(2)                                   |
|        |                       | 3.0                  | 1.65(2)                                   |
|        |                       | 2.0                  | 1.15(2)                                   |
|        |                       | 1.0                  | 0.44(3)                                   |
| L-Cys  | 526                   | 5.0                  | 1.49(3)                                   |
|        |                       | 4.0                  | 1.26(3)                                   |
|        |                       | 3.0                  | 0.90(2)                                   |
|        |                       | 2.0                  | 0.51(3)                                   |
|        |                       | 1.0                  | 0.36(2)                                   |
| L-Met  | 533                   | 5.0                  | 1.30(3)                                   |
|        |                       | 4.0                  | 1.13(2)                                   |
|        |                       | 3.0                  | 0.80(2)                                   |
|        |                       | 2.0                  | 0.46(2)                                   |
|        |                       | 1.0                  | 0.32(3)                                   |



**Table S5.** Observed *pseudo*-first order rate constants as a function of complex concentration for the reaction of complex **3** with 5'-GMP, L-Cys and L-Met (**L**) in water.

| Ligand | $\lambda_{\max}$ (nm) | $C_L$ [ $10^{-3}$ M] | $k_{\text{obsd}}$ [ $10^{-4}$ s $^{-1}$ ] |
|--------|-----------------------|----------------------|-------------------------------------------|
| 5'-GMP | 506                   | 5.0                  | 0.80(3)                                   |
|        |                       | 4.0                  | 0.62(2)                                   |
|        |                       | 3.0                  | 0.51(3)                                   |
|        |                       | 2.0                  | 0.29(3)                                   |
|        |                       | 1.0                  | 0.18(3)                                   |
| L-Cys  | 508                   | 5.0                  | 0.50(2)                                   |
|        |                       | 4.0                  | 0.40(2)                                   |
|        |                       | 3.0                  | 0.35(2)                                   |
|        |                       | 2.0                  | 0.20(3)                                   |
|        |                       | 1.0                  | 0.09(2)                                   |
| L-Met  | 482                   | 5.0                  | 0.44(3)                                   |
|        |                       | 4.0                  | 0.35(2)                                   |
|        |                       | 3.0                  | 0.25(3)                                   |
|        |                       | 2.0                  | 0.17(2)                                   |
|        |                       | 1.0                  | 0.01(3)                                   |

**Table S6.** Observed *pseudo*-first order rate constants as a function of complex concentration for the reaction of complex **4** with 5'-GMP, L-Cys and L-Met (**L**) in water.

| Ligand | $\lambda_{\max}$ (nm) | $C_L$ [ $10^{-3}$ M] | $k_{\text{obsd}}$ [ $10^{-4}$ s $^{-1}$ ] |
|--------|-----------------------|----------------------|-------------------------------------------|
| 5'-GMP | 506                   | 5.0                  | 3.20(3)                                   |
|        |                       | 4.0                  | 2.70(3)                                   |
|        |                       | 3.0                  | 2.07(3)                                   |
|        |                       | 2.0                  | 1.43(2)                                   |
|        |                       | 1.0                  | 0.52(2)                                   |
| L-Cys  | 500                   | 5.0                  | 2.22(2)                                   |
|        |                       | 4.0                  | 1.80(3)                                   |
|        |                       | 3.0                  | 1.25(2)                                   |
|        |                       | 2.0                  | 0.95(3)                                   |
|        |                       | 1.0                  | 0.44(2)                                   |
| L-Met  | 509                   | 5.0                  | 1.72(3)                                   |
|        |                       | 4.0                  | 1.35(3)                                   |
|        |                       | 3.0                  | 0.99(3)                                   |
|        |                       | 2.0                  | 0.68(3)                                   |
|        |                       | 1.0                  | 0.36(2)                                   |

**Table S7.** Observed *pseudo*-first order rate constants as a function of complex concentration for the reaction of complex **5** with 5'-GMP, L-Cys and L-Met (**L**) in water.

| Ligand | $\lambda_{\max}$ (nm) | $C_L$ [ $10^{-3}$ M] | $k_{\text{obsd}}$ [ $10^{-4}$ s $^{-1}$ ] |
|--------|-----------------------|----------------------|-------------------------------------------|
| 5'-GMP | 526                   | 5.0                  | 70.00(3)                                  |
|        |                       | 4.0                  | 58.00(2)                                  |
|        |                       | 3.0                  | 40.00(2)                                  |
|        |                       | 2.0                  | 25.00(2)                                  |
|        |                       | 1.0                  | 16.70(3)                                  |
| L-Cys  | 529                   | 5.0                  | 18.20(2)                                  |
|        |                       | 4.0                  | 15.00(3)                                  |
|        |                       | 3.0                  | 13.30(2)                                  |
|        |                       | 2.0                  | 7.96(3)                                   |
|        |                       | 1.0                  | 2.68(2)                                   |
| L-Met  | 527                   | 5.0                  | 8.52(3)                                   |
|        |                       | 4.0                  | 6.00(3)                                   |
|        |                       | 3.0                  | 4.00(3)                                   |
|        |                       | 2.0                  | 3.63(3)                                   |
|        |                       | 1.0                  | 1.76(2)                                   |

**Table S8.** Observed *pseudo*-first order rate constants as a function of complex concentration for the reaction of complex **6** with 5'-GMP, L-Cys and L-Met (**L**) in water.

| Ligand | $\lambda_{\max}$ (nm) | $C_L$ [ $10^{-3}$ M] | $k_{\text{obsd}}$ [ $10^{-4}$ s $^{-1}$ ] |
|--------|-----------------------|----------------------|-------------------------------------------|
| 5'-GMP | 498                   | 5.0                  | 48.00(2)                                  |
|        |                       | 4.0                  | 39.00(3)                                  |
|        |                       | 3.0                  | 26.50(2)                                  |
|        |                       | 2.0                  | 17.50(3)                                  |
|        |                       | 1.0                  | 11.40(2)                                  |
| L-Cys  | 494                   | 5.0                  | 13.60(3)                                  |
|        |                       | 4.0                  | 11.00(3)                                  |
|        |                       | 3.0                  | 7.30(2)                                   |
|        |                       | 2.0                  | 6.23(2)                                   |
|        |                       | 1.0                  | 2.46(2)                                   |
| L-Met  | 529                   | 5.0                  | 3.33(3)                                   |
|        |                       | 4.0                  | 2.64(2)                                   |
|        |                       | 3.0                  | 1.66(2)                                   |
|        |                       | 2.0                  | 1.10(3)                                   |
|        |                       | 1.0                  | 0.90(3)                                   |

**Table S9.** Observed *pseudo*-first order rate constants as a function of complex concentration for the reaction of complex **7** with 5'-GMP, L-Cys and L-Met (**L**) in water.

| Ligand | $\lambda_{\max}$ (nm) | $C_L$ [ $10^{-3}$ M] | $k_{\text{obsd}}$ [ $10^{-4}$ s $^{-1}$ ] |
|--------|-----------------------|----------------------|-------------------------------------------|
| 5'-GMP | 539                   | 5.0                  | 57.60(2)                                  |
|        |                       | 4.0                  | 45.00(2)                                  |
|        |                       | 3.0                  | 30.80(3)                                  |
|        |                       | 2.0                  | 20.00(2)                                  |
|        |                       | 1.0                  | 14.30(2)                                  |
| L-Cys  | 526                   | 5.0                  | 15.20(2)                                  |
|        |                       | 4.0                  | 11.00(2)                                  |
|        |                       | 3.0                  | 8.46(3)                                   |
|        |                       | 2.0                  | 6.34(3)                                   |
|        |                       | 1.0                  | 2.98(2)                                   |
| L-Met  | 525                   | 5.0                  | 4.72(3)                                   |
|        |                       | 4.0                  | 3.54(3)                                   |
|        |                       | 3.0                  | 2.54(3)                                   |
|        |                       | 2.0                  | 2.02(3)                                   |
|        |                       | 1.0                  | 0.91(3)                                   |

**Table S10.** List of amino acids exhibiting most pronounced interactions with the investigated complexes

| Serum albumin docking<br>PDB ID of SA | Complex              | Steric interactions                                                                      | Hydrogen bonds                              |
|---------------------------------------|----------------------|------------------------------------------------------------------------------------------|---------------------------------------------|
| 1AO6 – humane serum albumin           | <b>1<sup>a</sup></b> | Asn-483, Lys-351, Ser-480, Val-482, Trp-214                                              | Leu-481, Ser-480, Val-482                   |
|                                       | <b>1<sup>b</sup></b> | Leu-407, Leu-453, Leu-457, Ser-489, Arg-485, Leu-387, Ile-388, Asn-391, Arg-410, Val-433 | Ser-489, Asn-391, Arg-410                   |
|                                       | <b>2<sup>a</sup></b> | Asp-324, Arg-209, Val-216, Ser-323, Lys-212, Trp-214, Val-325                            | Asp-324, Lys-212                            |
|                                       | <b>2<sup>b</sup></b> | Glu-383, Glu-492, Leu-491, Ser-489                                                       | Ser-489, Glu-492, Leu-491                   |
|                                       | <b>3<sup>a</sup></b> | Arg-209, Ala-210, Ala-213, Trp-214, Phe-206                                              | Arg-209                                     |
|                                       | <b>3<sup>b</sup></b> | Leu-407, Asn-391, Ser-489, Leu-387, Phe-488, Arg-410, Tyr-411, Leu-457, Leu-453, Ile-388 | Tyr-411, Arg-410, Ser-489, Arg-485, Asn-391 |
|                                       | <b>4<sup>a</sup></b> | Val-482, Ser-480, Leu-481, Ala-210, Leu-347, Trp-214, Arg-209, Glu-354, Phe-206          | Leu-481, Ser-480, Trp-214, Arg-209          |
|                                       | <b>4<sup>b</sup></b> | Glu-383, Gln-390, Lys-414, Leu-491, Ser-489, Glu-492, Arg-410, Ala-490                   | Leu-491, Gln-390, Lys-414, Arg-410          |
|                                       | <b>5<sup>a</sup></b> | Ser-480, Asn-483, Lys-351, Ala-210, Trp-214                                              | Ser-480, Val-482                            |
|                                       | <b>5<sup>b</sup></b> | Ser-489, Arg-410, Gln-390, Asn-386, Glu-383, Glu-492                                     | Arg-410, Ser-489, Gln-390                   |
|                                       | <b>6<sup>a</sup></b> | Ala-350, Lys-351, Arg-209, Trp-214, Val-482, Glu-354                                     | Arg-209                                     |
|                                       | <b>6<sup>b</sup></b> | Phe-403, Val-433, Cys-392, Leu-407, Asn-391, Tyr-411, Ser-489, Leu-457, Val-456, Arg-485 | Asn-391, Arg-410, Tyr-411                   |
|                                       | <b>7<sup>a</sup></b> | Leu-481, Thr-478, Phe-206, Arg-209, Trp-214, Lys-351, Ala-350, Leu-327, Glu-354          | Arg-209                                     |
|                                       | <b>7<sup>b</sup></b> | Gln-390, Glu-492, Thr-540, Lys-413                                                       | Lys-413, Thr-540                            |

<sup>a</sup>Binding into the subdomain IIA (site I)

<sup>b</sup>Binding into the subdomain IIIA (site II)

**Table S11.** Percent of cytotoxicity induced by 48 h treatment of MRC-5, MDA-MB 231, HCT116 and HeLa cells with 100 μM complexes. Result are expressed as mean±SD.

---

|          | <b>MRC-5</b> | <b>HCT116</b> | <b>SS</b>      | <b>HeLa</b> | <b>SS</b>      | <b>MDA-MB<br/>231</b> | <b>SS</b>      |
|----------|--------------|---------------|----------------|-------------|----------------|-----------------------|----------------|
| <b>1</b> | 29.8±5.9     | 54.7±0.6      | <b>1.8</b>     | 32.2±4.1    | <b>1.1</b>     | 48.3±4.4              | <b>1.6</b>     |
| <b>2</b> | 28.6±7.3     | 84.0±1.9      | <b>2.9</b>     | 34.4±7.5    | <b>1.2</b>     | 91.4±6.0              | <b>3.2</b>     |
| <b>3</b> | 49.0±7.8     | 39.9±1.5      | <b>0.8</b>     | 56.2±4.1    | <b>1.2</b>     | 51.8±7.1              | <b>1.1</b>     |
| <b>4</b> | 21.4±7.0     | 26.7±1.3      | <b>1.3</b>     | 28.9±3.1    | <b>1.4</b>     | 18.0±7.5              | <b>0.8</b>     |
| <b>5</b> | -8.2±5.7     | 83.1±5.3      | <b>&gt;100</b> | 45.3±6.8    | <b>&gt;100</b> | 50.5±5.9              | <b>&gt;100</b> |
| <b>6</b> | 2.9±6.3      | 65.7±6.7      | <b>22.5</b>    | 86.2±5.5    | <b>29.5</b>    | 65.7±8.3              | <b>22.5</b>    |
| <b>7</b> | 24.1±4.8     | 24.3±3.9      | <b>1.0</b>     | 33.4±3.8    | <b>1.4</b>     | 23.3±4.1              | <b>1.0</b>     |

---
